# Supplementary material
Source: PubMed Central journal article supplement (PMC3993969)
Supplement: pr4010019_si_001.pdf [file pr4010019_si_001.pdf]

## **SUPPORTING INFORMATION**

### **Enhanced FASP (eFASP) to Increase Proteome Coverage and Sample Recovery for Quantitative Proteomic Experiments**

Jonathan Erde<sup>†</sup>, Rachel R. Ogorzalek Loo<sup>‡</sup>, and Joseph A. Loo<sup>†,‡\*</sup>

<sup>†</sup>Department of Chemistry and Biochemistry, and <sup>‡</sup>Department of Biological Chemistry

University of California-Los Angeles, Los Angeles, CA

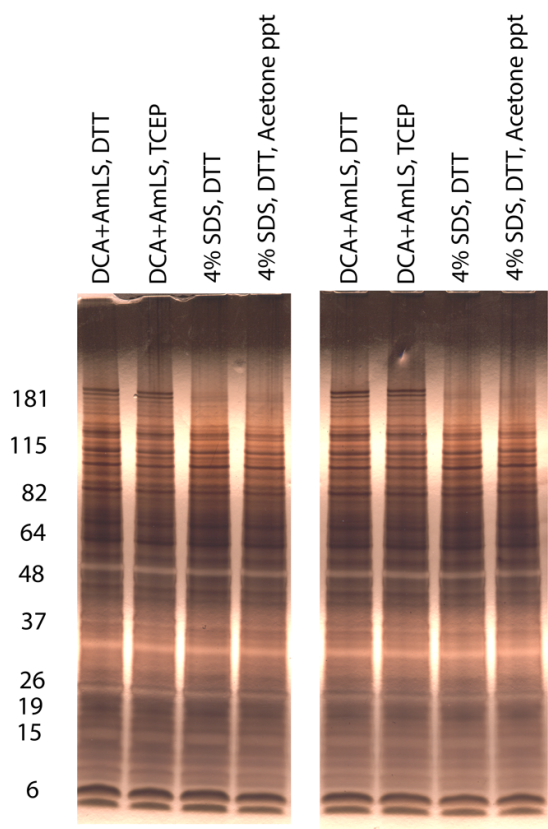

**Figure S1.** Deoxycholic acid (DCA) and ammonium lauroyl sarcosine (AmLS) can replace SDS in lysis buffers.

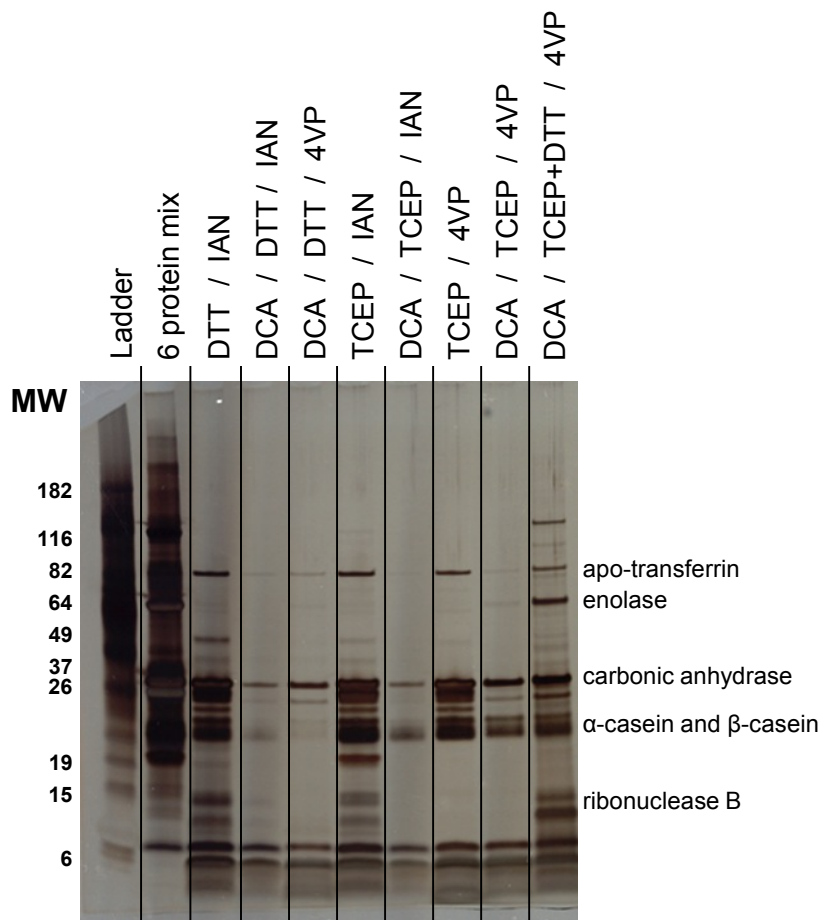

**Figure S2.** A standard protein mixture was reduced and alkylated with combinations of DTT, TCEP, IAN, and 4-VP, prior to trypsin digestion in the presence or absence of 0.1% DCA. The protein ladder was loaded into lane 1, the unprocessed protein mixture (10  $\mu$ g) was loaded into lane 2, and the experimental protein mixture digestions (10  $\mu$ g) were loaded into lanes 3 through 10, of an SDS-PAGE gel.

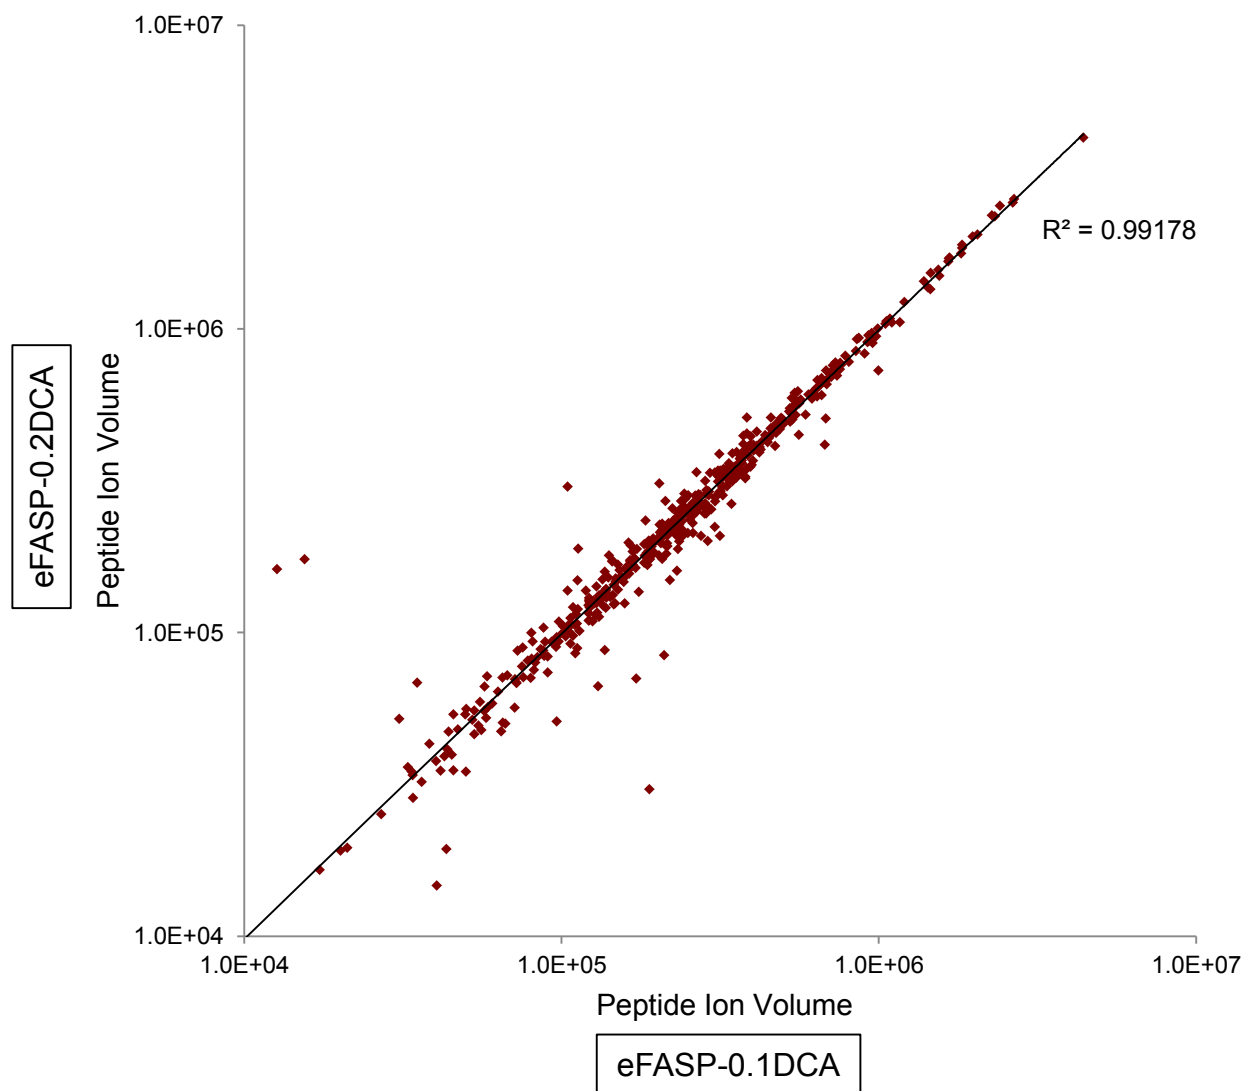

**Figure S3.** Quantitative comparison of peptide yield from eFASP processing of *E. coli* lysate (50  $\mu$ g) with 0.2% DCA and 0.1% DCA in the digestion buffer. The resulting digests were analyzed by LC-MS<sup>E</sup>. Peptide ion volumes were extracted, compared and plotted.

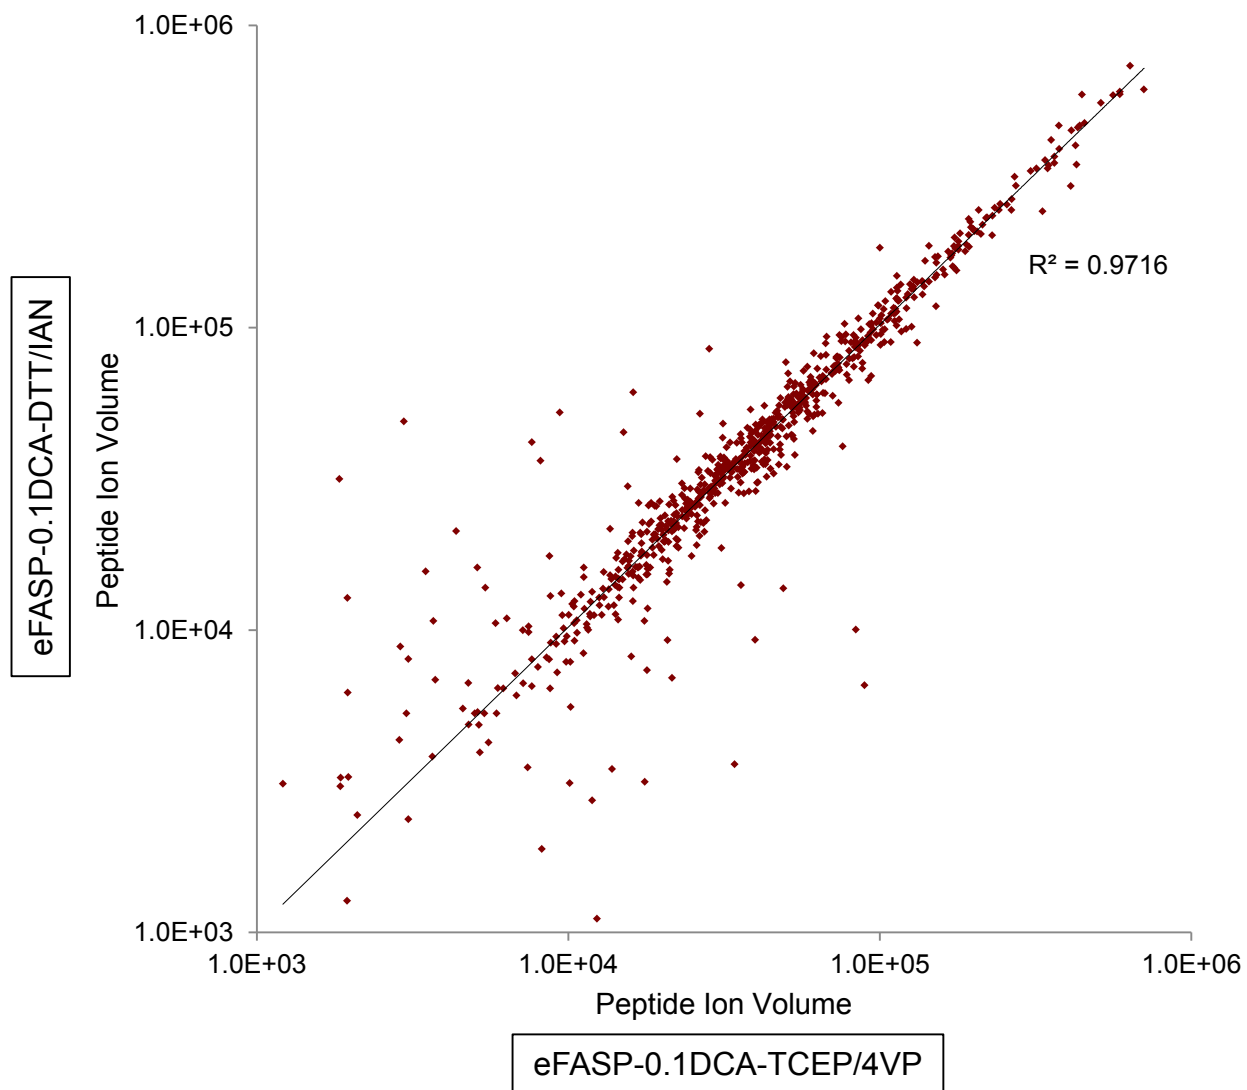

**Figure S4.** Quantitative comparison of peptide yield from eFASP-0.2DCA processing of *E. coli* lysate that was either reduced with DTT and alkylated in-filter with IAN or reduced with TCEP and alkylated in-solution with 4-VP. The resulting digests were analyzed by LC-MS<sup>E</sup>. Peptide ion volumes were extracted, compared and plotted.

| <u>Prep Method</u> | <u>Passivation</u> | <u>Reduction/Alkylation</u> | <u>Proteins</u> | <u>Peptides</u> |               |
|--------------------|--------------------|-----------------------------|-----------------|-----------------|---------------|
|                    |                    |                             |                 | <u>Pass 1</u>   | <u>Pass 2</u> |
| eFASP-0.2DCA-IAN   | 5% T-20            | DTT / IAN                   | 284             | 1,531           | 3,671         |
| eFASP-0.2DCA-4VP   | 5% T-20            | TCEP / 4VP                  | 241             | 1,297           | 3,373         |

**Table S1.** *E. coli* lysates were prepared with solubilization buffer containing either DTT or TCEP. Lysate prepared with DTT was processed by eFASP with alkylation by iodoacetamide. Lysate prepared with TCEP was alkylated in-solution and then processed by eFASP, skipping the steps up to and including in-filter alkylation. Aliquots from each digest (100 ng) were analyzed by LC-MS<sup>E</sup> and searched for protein and peptide content. (Note: “eFASP-0.2DCA-IAN” = “eFASP-0.2DCA-T20” from Table 4)

## Supplementary Protocols

Two optimized eFASP protocols are described below. The first is the standard procedure that utilizes in-filter alkylation with iodoacetamide. The second is the express procedure that utilizes in-solution alkylation with 4-vinylpyridine. The latter provides a time advantage through elimination of the buffer exchange steps required by in-filter alkylation.

### eFASP: Standard

#### 1. Materials

##### **Solutions and Reagents**

**Passivation Solution:** 5% (v/v) TWEEN<sup>®</sup>-20

**Lysis Buffer:** 4% SDS, 0.2% DCA, 50 mM TCEP, 100 mM ABC, pH 8

**Exchange Buffer:** 8 M urea, 0.2% DCA, 100 mM ABC, pH 8

**Alkylation Buffer:** 8 M urea, 50 mM IAN, and 100 mM ABC, pH 8

**Digestion Buffer:** 0.2% DCA, 50 mM ABC, pH 8

**Trypsin Stock:** 0.5 µg/µl, 50 mM ABC, pH 8

**Peptide Recovery Buffer:** 50 mM ABC, pH 8

Ethyl acetate

Methanol

MS-grade H<sub>2</sub>O

##### **Equipment**

Microcon<sup>®</sup> UF unit (YM-30 30 kDa cutoff limit)

Bench-top centrifuge

Thermo-mixer, initially set to 90°C

SpeedVac<sup>®</sup>

Squeeze bottle containing MS-grade H<sub>2</sub>O

Sonicator

Eppendorf LoBind<sup>®</sup> tube, 2 mL

#### 2. Methods

##### **2.1 Surface Passivation**

1. Incubate the filter unit and collection tube overnight in **Passivation Solution** on a shaker. For small batches, this can be done in a 50 mL Falcon tube.
2. Remove components and quickly rinse with a squeeze bottle containing MS-grade H<sub>2</sub>O.
3. Transfer components to a clean container with 250 to 500 mL of MS-grade water. Place on a shaker at low speed for 30 minutes. Repeat this step once or twice with fresh water.
4. Reserve the passivated collection tube for peptide collection.

##### **2.2 Sample lysis**

1. Add **Lysis Buffer** to cell pellet and mix at 600 rpm in a thermo-mixer for 10 minutes at 90°C. Protein concentration should be high enough such that 25 µl of

lysate will provide the desired amount of protein for processing (max 250 µg protein).

2. Sonicate lysate in three 10-second intervals and centrifuge at 14,000 g for 10 minutes. Repeat this step once.
3. Sonicate the supernate and pellet, and cool to 37°C.

### 2.3 Sample processing

1. Mix up to 25 µL of lysate with 200 µL **Exchange Buffer**.
2. Dispense the diluted lysate to the passivated filter unit (assembled with a non-passivated collection tube) and centrifuge at 14,000 g for 10 minutes. Discard filtrate.
3. Add 200 µL **Exchange Buffer** and centrifuge at 14,000 g for 10 minutes. Discard filtrate. Repeat this step twice.
4. Add 100 µL **Alkylation Solution**, and mix at 300 rpm in a thermo-mixer for 1 hour at 37°C.
5. Centrifuge at 14,000 g for 10 minutes. Discard filtrate.
6. Add 200 µL **Exchange Buffer** and centrifuge at 14,000 g for 10 minutes. Discard filtrate.
7. Add 200 µL **eFASP Digestion Buffer** and centrifuge at 14,000 g for 10 minutes. Discard filtrate. Repeat this step twice.
8. Transfer the filter unit to the reserved passivated collection tube.
9. Add 100 µL **eFASP Digestion Buffer** to each filter unit.
10. Add **Trypsin Stock** to the filter unit (trypsin:protein 1:50 w:w), and mix at low speed in a thermo-mixer for 12 hours at 37°C. Ensure the filter unit cap is secure to prevent evaporation.
11. Centrifuge at 14,000 g for 10 minutes.
12. Add 50 µL of **Peptide Recovery Buffer** to each filter unit and centrifuge at 14,000 g for 10 minutes. Repeat this step once.

### 2.4 Phase Transfer

1. Add 200 µL of ethyl acetate to the peptide-containing filtrate and transfer to a 2 mL Eppendorf LoBind® tube.
2. Add 2.5 µL TFA and quickly vortex. White thread-like precipitate may be visible for large quantities of peptides.
3. Add enough ethyl acetate to fill the tube, leaving space for sonication.
4. Sonicate for 10 seconds and centrifuge at 16,000 g for 10 minutes.
5. Carefully remove and discard as much of the upper organic layer as possible without disturbing the boundary layer.
6. Repeat steps 3 through 5 twice.
7. Place the uncovered sample tube in a thermo-mixer at 60°C, in a fume hood, for 5 minutes to remove residual ethyl acetate.
8. Remove residual organic and volatile salts by vacuum drying in a SpeedVac. Resuspend in 50% methanol and vacuum-dry 2 to 3 times.



## **eFASP: Express**

### 1. Materials

#### **Solutions and Reagents**

**Passivation Solution:** 5% (v/v) TWEEN<sup>®</sup>-20

**Lysis Buffer:** 4% SDS, 0.2% DCA, 50 mM TCEP, 100 mM ABC, pH 8

**Exchange Buffer:** 8 M urea, 0.2% DCA, 100 mM ABC, pH 8

**Alkylation Stock:** 500 mM 4-VP in ethanol

**Quench Buffer:** 1M DTT, 100 mM ABC, pH 8

**Digestion Buffer:** 0.2% DCA, 50 mM ABC, pH 8

**Trypsin Stock:** 0.5 µg/µl, 50 mM ABC, pH 8

**Peptide Recovery Buffer:** 50 mM ABC, pH 8

Ethyl acetate

Methanol

MS-grade H<sub>2</sub>O

#### **Equipment**

Microcon<sup>®</sup> UF unit (YM-30 30 kDa cutoff limit)

Bench-top centrifuge

Thermo-mixer, initially set to 90°C

SpeedVac<sup>®</sup>

Squeeze bottle containing MS-grade H<sub>2</sub>O

Sonicator

Eppendorf LoBind<sup>®</sup> tube, 2 mL

### 2. Methods

#### **2.1 Surface Passivation**

**See eFASP Protocol: Standard**

#### **2.2 Sample lysis**

1. Add **Lysis Buffer** to cell pellet and mix at 600 rpm in a thermo-mixer for 10 minutes at 90°C.
2. Sonicate lysate in three 10-second intervals and centrifuge at 14,000 g for 10 minutes. Repeat this step once.
3. Sonicate the supernate and pellet, and cool to 37°C.
4. Add **Alkylation Stock** to final concentration of 25 mM 4-VP and mix at 300 rpm in a thermo-mixer for 1 hour at 37°C.
5. Add **Quench Buffer** to final concentration of 40 mM DTT.

#### **2.3 Sample processing**

1. Mix up to 25 µl of lysate with 200 µL **Exchange Buffer**.
2. Dispense the diluted lysate to the passivated filter unit (assembled with a non-passivated collection tube) and centrifuge at 14,000 g for 10 minutes. Discard filtrate.
3. Add 200 µL **Exchange Buffer** and centrifuge at 14,000 g for 10 minutes. Discard filtrate. Repeat this step twice.

4. Add 200  $\mu$ L **eFASP Digestion Buffer** and centrifuge at 14,000 g for 10 minutes. Discard filtrate. Repeat this step twice.
5. Transfer the filter unit to the reserved passivated collection tube.
6. Add 100  $\mu$ L **eFASP Digestion Buffer** to each filter unit.
7. Add **Trypsin Stock** to the filter unit (trypsin:protein 1:50 w:w), and mix at low speed in a thermo-mixer for 12 hours at 37°C. Ensure the filter unit cap is secure to prevent evaporation.
8. Centrifuge at 14,000 g for 10 minutes.
9. Add 50  $\mu$ L of **Peptide Recovery Buffer** to each filter unit and centrifuge at 14,000 g for 10 minutes. Repeat this step once.

#### **2.4 Phase Transfer**

**See eFASP Protocol: Standard**

# Analysis and Documentation of Peptide and Protein Identifications

## Data Processing and Searching

### Processing Parameters

|                            |                                          |
|----------------------------|------------------------------------------|
| Processing engines         | Aped3D64 (v 2.128)<br>Peptide3D (v 2.81) |
| Peak width                 | Automatic                                |
| MS resolution              | Automatic                                |
| Lockmass                   | 785.8426                                 |
| Lockmass tolerance, ppm    | 0.25                                     |
| Low energy threshold       | 250                                      |
| High energy threshold      | 100                                      |
| Binned intensity threshold | 750                                      |

### Search Engine Parameters

|                              |                                            |
|------------------------------|--------------------------------------------|
| Search Engine                | iaDBs (v 2.119)                            |
| Enzyme                       | Trypsin                                    |
| Missed Cleavage              | 2                                          |
| Fixed                        | Carbamidomethyl or S-pyridylethyl cysteine |
| Variable                     | Oxidized methionine                        |
| False positive rate          | 4                                          |
| Minimum B/Y ions per peptide | 3                                          |
| Minimum peptide per protein  | 1                                          |
| Minimum B/Y ions per protein | 7                                          |

### Protein Sequence Database

|                                |                           |
|--------------------------------|---------------------------|
| Database                       | HAMAP <i>E. coli</i> K-12 |
| Date                           | 2012-07-09                |
| Total protein entries          | 4431                      |
| <i>E. coli</i> protein entries | 4364                      |
| Contaminant protein entries    | 67                        |

## Contaminant protein entries

| <u>Accession</u> |                 |
|------------------|-----------------|
| 1. GFP_AEQVI     | 39. K22E_HUMAN  |
| 2. LALBA_BOVIN   | 40. LYSC_LYSEN  |
| 3. CASA1_BOVIN   | 41. PYGM_RABIT  |
| 4. CASA2_BOVIN   | 42. KRA61_SHEEP |
| 5. TRY2_BOVIN    | 43. KRA33_SHEEP |
| 6. CASB_BOVIN    | 44. KRA34_SHEEP |
| 7. LACB_BOVIN    | 45. KRB2A_SHEEP |
| 8. TRY1_BOVIN    | 46. KRB2B_SHEEP |
| 9. CTRA_BOVIN    | 47. KRB2C_SHEEP |
| 10. CTRB_BOVIN   | 48. KRB2D_SHEEP |
| 11. HBBF_BOVIN   | 49. KRA3_SHEEP  |
| 12. HBA_BOVIN    | 50. KRA3A_SHEEP |
| 13. HBB_BOVIN    | 51. K1C15_SHEEP |
| 14. HBE2_BOVIN   | 52. K1M1_SHEEP  |
| 15. HBE4_BOVIN   | 53. K1M2_SHEEP  |
| 16. HBM_BOVIN    | 54. K2M1_SHEEP  |
| 17. CASK_BOVIN   | 55. K2M3_SHEEP  |
| 18. PEPA_BOVIN   | 56. K2M2_SHEEP  |
| 19. ALBU_BOVIN   | 57. KRUC_SHEEP  |
| 20. AMY1_HUMAN   | 58. LUCI_PHOPY  |
| 21. K1H1_HUMAN   | 59. ADH1_YEAST  |
| 22. K1H2_HUMAN   | 60. ENO1_YEAST  |
| 23. KT33A_HUMAN  | 61. NUCA_SERMA  |
| 24. KT33B_HUMAN  | 62. SSPA_STAA8  |
| 25. KRT34_HUMAN  | 63. SSPA_STAAU  |
| 26. KRT35_HUMAN  | 64. PEPC_PIG    |
| 27. KRT36_HUMAN  | 65. PEPA_PIG    |
| 28. KRT37_HUMAN  | 66. PEPB_PIG    |
| 29. KRT38_HUMAN  | 67. TRYP_PIG    |
| 30. K1C10_HUMAN  |                 |
| 31. K1C9_HUMAN   |                 |
| 32. KRT81_HUMAN  |                 |
| 33. KRT82_HUMAN  |                 |
| 34. KRT83_HUMAN  |                 |
| 35. KRT84_HUMAN  |                 |
| 36. KRT85_HUMAN  |                 |
| 37. KRT86_HUMAN  |                 |
| 38. K2C1_HUMAN   |                 |

## Documentation of Peptide and Protein Identifications

*FASP (see Table 2A)*

### **FASP** (see Table 2A)

|     | Accession | Score | Coverage, % | Peptide matches |
|-----|-----------|-------|-------------|-----------------|
| 1.  | P0A910    | 628   | 30.1        | 5               |
| 2.  | P00634    | 610   | 20.4        | 5               |
| 3.  | P0ADC1    | 571   | 35.8        | 4               |
| 4.  | P69829    | 552   | 24.5        | 2               |
| 5.  | P0AFH8    | 430   | 42.3        | 4               |
| 6.  | P06959    | 407   | 10.6        | 7               |
| 7.  | P0A9M8    | 362   | 7.7         | 5               |
| 8.  | P0A7V0    | 337   | 11.2        | 3               |
| 9.  | P0AAH0    | 308   | 25.3        | 5               |
| 10. | P0A6N1    | 250   | 13.5        | 6               |
| 11. | P0A6Y8    | 234   | 3.1         | 5               |
| 12. | P0A9B2    | 231   | 16.0        | 2               |
| 13. | P33368    | 229   | 35.2        | 4               |
| 14. | P06996    | 222   | 9.0         | 3               |

## Documentation of Peptide and Protein Identifications

*eFASP (0.1%DCA) (see Table 2A)*

### **eFASP (0.1%DCA)** (see Table 2A)

|     | Accession | Score  | Coverage, % | Peptide matches |
|-----|-----------|--------|-------------|-----------------|
| 1.  | P0A6N1    | 69,405 | 81.2        | 25              |
| 2.  | P0ACF8    | 60,448 | 59.9        | 7               |
| 3.  | P69776    | 58,402 | 74.4        | 4               |
| 4.  | P0ABT2    | 58,196 | 89.2        | 16              |
| 5.  | P0A910    | 52,292 | 77.8        | 20              |
| 6.  | P0AG82    | 51,352 | 58.1        | 21              |
| 7.  | P0ADB7    | 50,805 | 39.6        | 1               |
| 8.  | P06996    | 50,667 | 88.8        | 25              |
| 9.  | P0A9B2    | 40,898 | 72.8        | 19              |
| 10. | P0A862    | 37,661 | 48.8        | 6               |
| 11. | P0ACF0    | 36,697 | 57.8        | 5               |
| 12. | P69908    | 36,331 | 55.8        | 22              |
| 13. | P69910    | 36,247 | 54.9        | 22              |
| 14. | P0A6P9    | 35,954 | 76.2        | 20              |
| 15. | P00634    | 32,237 | 80.7        | 28              |
| 16. | P0A917    | 31,653 | 50.9        | 9               |
| 17. | P0A799    | 29,552 | 68.0        | 22              |
| 18. | P0A6F5    | 26,936 | 73.4        | 32              |
| 19. | P0AE08    | 24,296 | 65.2        | 10              |
| 20. | P69783    | 24,153 | 63.3        | 9               |
| 21. | P0C0L2    | 23,823 | 57.3        | 8               |
| 22. | P0A6Y8    | 22,684 | 75.6        | 39              |
| 23. | P0AET2    | 22,492 | 57.4        | 6               |
| 24. | P00761    | 22,469 | 77.1        | 9               |
| 25. | P0AF93    | 22,177 | 71.9        | 5               |
| 26. | P0AEH5    | 20,487 | 45.5        | 4               |
| 27. | P08200    | 19,823 | 52.9        | 18              |
| 28. | P0A8G6    | 19,788 | 58.6        | 9               |
| 29. | P0ABK5    | 18,017 | 86.7        | 19              |
| 30. | P0ABB4    | 17,985 | 85.4        | 27              |
| 31. | P0ABD3    | 17,507 | 67.7        | 10              |
| 32. | P28635    | 17,290 | 69.7        | 13              |
| 33. | P0AA25    | 17,234 | 46.8        | 4               |
| 34. | P0A905    | 16,285 | 38.7        | 4               |
| 35. | P00448    | 16,250 | 71.4        | 10              |
| 36. | P0A6M8    | 15,677 | 60.5        | 31              |
| 37. | P0ADE6    | 15,472 | 72.5        | 9               |
| 38. | P0A6F9    | 14,898 | 51.6        | 4               |

**Documentation of Peptide and Protein Identifications**  
*eFASP (0.1%DCA) (see Table 2A)*

|     |        |        |      |    |
|-----|--------|--------|------|----|
| 39. | P0AGD3 | 13,409 | 73.1 | 8  |
| 40. | P0A6A8 | 12,294 | 33.3 | 3  |
| 41. | P00350 | 12,196 | 62.4 | 26 |
| 42. | P0A7J3 | 12,074 | 64.9 | 11 |
| 43. | P0A9Y6 | 12,066 | 92.8 | 7  |
| 44. | P0AEK4 | 11,990 | 47.3 | 9  |
| 45. | P0AB71 | 11,323 | 52.4 | 12 |
| 46. | P0A7V0 | 11,160 | 51.0 | 8  |
| 47. | P0A912 | 11,069 | 72.3 | 10 |
| 48. | P0AG86 | 10,732 | 60.7 | 5  |
| 49. | Q2M7R5 | 10,690 | 69.6 | 4  |
| 50. | P21420 | 10,672 | 54.0 | 14 |
| 51. | P0AG80 | 10,302 | 54.8 | 21 |
| 52. | P0AFG6 | 10,282 | 34.6 | 12 |
| 53. | P0A870 | 10,276 | 66.9 | 19 |
| 54. | P0ADY7 | 10,242 | 37.5 | 4  |
| 55. | P0AEU7 | 9,797  | 47.8 | 8  |
| 56. | P0AA04 | 9,648  | 81.2 | 5  |
| 57. | P0A7W1 | 9,500  | 67.1 | 8  |
| 58. | P09373 | 9,424  | 64.5 | 37 |
| 59. | P77717 | 9,258  | 74.7 | 5  |
| 60. | P02932 | 8,891  | 53.3 | 19 |
| 61. | P0A9P0 | 8,864  | 49.4 | 17 |
| 62. | P63284 | 8,685  | 65.7 | 44 |
| 63. | P62707 | 8,538  | 58.0 | 12 |
| 64. | P21367 | 8,483  | 60.1 | 8  |
| 65. | P61889 | 7,940  | 81.4 | 21 |
| 66. | P0A825 | 7,809  | 47.0 | 17 |
| 67. | P0ACF4 | 7,746  | 57.8 | 6  |
| 68. | P0A7K2 | 7,745  | 61.2 | 7  |
| 69. | P0A9Q9 | 7,638  | 30.5 | 7  |
| 70. | P0A9D8 | 7,476  | 31.0 | 7  |
| 71. | P0AED0 | 7,430  | 36.1 | 2  |
| 72. | P06959 | 7,137  | 61.4 | 30 |
| 73. | P0AES9 | 6,815  | 54.6 | 2  |
| 74. | P64581 | 6,807  | 9.9  | 1  |
| 75. | P0A850 | 6,666  | 56.3 | 21 |
| 76. | P0A858 | 6,413  | 40.0 | 8  |
| 77. | P0ABB0 | 6,348  | 58.1 | 24 |
| 78. | P0A6P1 | 6,330  | 62.5 | 17 |
| 79. | P0AC69 | 6,233  | 21.7 | 2  |

**Documentation of Peptide and Protein Identifications**  
*eFASP (0.1%DCA) (see Table 2A)*

|      |        |       |      |    |
|------|--------|-------|------|----|
| 80.  | P0A6X7 | 5,947 | 47.5 | 6  |
| 81.  | P45578 | 5,886 | 76.0 | 8  |
| 82.  | P08839 | 5,723 | 53.7 | 23 |
| 83.  | P0A953 | 5,678 | 43.4 | 10 |
| 84.  | P0ACE7 | 5,641 | 53.8 | 3  |
| 85.  | P0A7S9 | 5,597 | 58.5 | 7  |
| 86.  | P0AFG8 | 5,543 | 51.2 | 35 |
| 87.  | P60438 | 5,507 | 30.1 | 6  |
| 88.  | P0AF70 | 5,452 | 53.0 | 3  |
| 89.  | P02359 | 5,355 | 53.1 | 8  |
| 90.  | P0A7R5 | 5,207 | 40.8 | 4  |
| 91.  | P61175 | 5,167 | 51.8 | 6  |
| 92.  | P0ACX3 | 5,161 | 35.6 | 3  |
| 93.  | P0A7R1 | 5,007 | 57.1 | 7  |
| 94.  | P0A8E7 | 4,992 | 42.9 | 6  |
| 95.  | P0A7V3 | 4,990 | 49.8 | 10 |
| 96.  | P0AG55 | 4,962 | 35.0 | 6  |
| 97.  | P0AEK2 | 4,962 | 52.5 | 7  |
| 98.  | P61949 | 4,800 | 46.6 | 5  |
| 99.  | P0AD61 | 4,711 | 38.5 | 12 |
| 100. | P0A7Z4 | 4,658 | 48.9 | 15 |
| 101. | P0A991 | 4,638 | 40.6 | 10 |
| 102. | P0AC59 | 4,618 | 32.6 | 6  |
| 103. | P0A9M8 | 4,616 | 36.8 | 17 |
| 104. | P0C0V0 | 4,537 | 56.3 | 18 |
| 105. | P0A7J7 | 4,524 | 37.3 | 6  |
| 106. | P0AAN9 | 4,462 | 31.4 | 1  |
| 107. | P0A707 | 4,428 | 55.6 | 8  |
| 108. | P75694 | 4,288 | 44.0 | 4  |
| 109. | P0A9C5 | 4,267 | 52.0 | 16 |
| 110. | P60723 | 4,263 | 34.3 | 6  |
| 111. | P0A9Q7 | 4,241 | 46.6 | 29 |
| 112. | P37194 | 4,194 | 20.2 | 3  |
| 113. | P0ABP8 | 4,098 | 54.4 | 8  |
| 114. | P0AEQ3 | 4,085 | 34.7 | 6  |
| 115. | P13979 | 4,012 | 30.7 | 6  |
| 116. | P0ACA3 | 3,938 | 54.7 | 9  |
| 117. | P0A7R9 | 3,891 | 45.7 | 5  |
| 118. | P76402 | 3,858 | 42.7 | 3  |
| 119. | P0A7D4 | 3,836 | 39.8 | 12 |
| 120. | P0AFJ5 | 3,809 | 46.3 | 7  |



**Documentation of Peptide and Protein Identifications**  
*eFASP (0.1%DCA) (see Table 2A)*

|      |        |       |      |    |
|------|--------|-------|------|----|
| 121. | P0ADB1 | 3,769 | 50.9 | 4  |
| 122. | P0A8L1 | 3,759 | 42.1 | 12 |
| 123. | P0A9Q1 | 3,624 | 43.3 | 12 |
| 124. | P00509 | 3,600 | 65.4 | 22 |
| 125. | P0AFH8 | 3,498 | 45.8 | 7  |
| 126. | P31658 | 3,487 | 42.8 | 10 |
| 127. | P0A715 | 3,410 | 44.0 | 11 |
| 128. | P23869 | 3,395 | 38.4 | 6  |
| 129. | P0A805 | 3,380 | 43.2 | 8  |
| 130. | P0ADW3 | 3,373 | 50.8 | 6  |
| 131. | P0A800 | 3,344 | 26.4 | 2  |
| 132. | P0AEZ9 | 3,247 | 43.5 | 7  |
| 133. | P0AG67 | 3,241 | 40.6 | 24 |
| 134. | P0A7D7 | 3,240 | 32.1 | 8  |
| 135. | P0A8P3 | 3,202 | 51.7 | 6  |
| 136. | P61714 | 3,165 | 36.5 | 3  |
| 137. | P0A836 | 3,159 | 48.5 | 19 |
| 138. | P0A7L0 | 3,153 | 45.7 | 8  |
| 139. | P0A9L3 | 3,153 | 32.0 | 4  |
| 140. | P0A7V8 | 3,142 | 34.5 | 8  |
| 141. | P0A6X3 | 3,106 | 24.5 | 2  |
| 142. | P02358 | 3,086 | 51.9 | 5  |
| 143. | P0A763 | 3,000 | 49.0 | 5  |
| 144. | P0A7W7 | 2,975 | 43.9 | 6  |
| 145. | Q46857 | 2,919 | 44.0 | 9  |
| 146. | P0AGE6 | 2,878 | 40.4 | 3  |
| 147. | P0A9K7 | 2,865 | 48.1 | 10 |
| 148. | P0A8T7 | 2,857 | 40.9 | 42 |
| 149. | P0A717 | 2,854 | 32.4 | 7  |
| 150. | P0A955 | 2,846 | 40.9 | 3  |
| 151. | P39177 | 2,836 | 52.8 | 7  |
| 152. | P0AE52 | 2,833 | 34.6 | 4  |
| 153. | P04128 | 2,796 | 45.1 | 3  |
| 154. | P0ABH7 | 2,786 | 59.3 | 16 |
| 155. | P0A998 | 2,785 | 44.9 | 7  |
| 156. | P23721 | 2,707 | 46.1 | 18 |
| 157. | P0A8W8 | 2,707 | 58.5 | 7  |
| 158. | P0AE12 | 2,696 | 27.7 | 11 |
| 159. | P0AAX8 | 2,641 | 29.4 | 6  |
| 160. | P0A8V2 | 2,638 | 46.7 | 47 |
| 161. | P0AE06 | 2,634 | 48.9 | 12 |

**Documentation of Peptide and Protein Identifications**  
*eFASP (0.1%DCA) (see Table 2A)*

|      |        |       |      |    |
|------|--------|-------|------|----|
| 162. | P23538 | 2,611 | 35.9 | 23 |
| 163. | P12758 | 2,602 | 58.5 | 9  |
| 164. | P0A7A9 | 2,597 | 23.3 | 5  |
| 165. | P0AC62 | 2,580 | 57.8 | 3  |
| 166. | P0A908 | 2,557 | 19.8 | 4  |
| 167. | P0AA10 | 2,547 | 39.4 | 4  |
| 168. | P0ADX7 | 2,473 | 32.9 | 4  |
| 169. | P0C0S1 | 2,466 | 31.8 | 7  |
| 170. | P0ADY3 | 2,448 | 35.0 | 5  |
| 171. | P09372 | 2,406 | 39.1 | 7  |
| 172. | P0ADG7 | 2,398 | 44.3 | 15 |
| 173. | P0AF36 | 2,324 | 44.4 | 3  |
| 174. | P0A7X3 | 2,318 | 24.6 | 4  |
| 175. | P0AAI9 | 2,314 | 42.4 | 6  |
| 176. | P0A903 | 2,308 | 52.0 | 12 |
| 177. | P0A6A3 | 2,295 | 32.5 | 7  |
| 178. | P0A6Q6 | 2,258 | 37.1 | 4  |
| 179. | P0A7M6 | 2,203 | 55.6 | 4  |
| 180. | P0ABD8 | 2,200 | 18.6 | 2  |
| 181. | P02931 | 2,143 | 41.4 | 8  |
| 182. | P28304 | 2,137 | 52.6 | 9  |
| 183. | P0AG30 | 2,116 | 41.8 | 15 |
| 184. | P31663 | 2,081 | 33.2 | 6  |
| 185. | P0A8M0 | 2,078 | 33.3 | 14 |
| 186. | P0A6Y1 | 2,069 | 41.5 | 5  |
| 187. | P00934 | 2,063 | 49.8 | 17 |
| 188. | P0AB80 | 2,034 | 23.0 | 6  |
| 189. | P25738 | 2,016 | 54.8 | 3  |
| 190. | P0ABJ9 | 2,012 | 17.6 | 7  |
| 191. | P33602 | 2,006 | 32.7 | 27 |
| 192. | P0A7Z0 | 1,990 | 29.7 | 3  |
| 193. | P0ADZ7 | 1,990 | 11.8 | 2  |
| 194. | P06999 | 1,957 | 34.0 | 7  |
| 195. | P60422 | 1,930 | 40.7 | 10 |
| 196. | P0A6T9 | 1,868 | 24.0 | 2  |
| 197. | P0A7K6 | 1,854 | 20.0 | 3  |
| 198. | P0A855 | 1,852 | 42.6 | 12 |
| 199. | P0AAH0 | 1,821 | 42.8 | 8  |
| 200. | P0AG44 | 1,813 | 18.1 | 2  |
| 201. | P0ACY1 | 1,793 | 18.0 | 5  |
| 202. | P02413 | 1,791 | 27.8 | 7  |

**Documentation of Peptide and Protein Identifications**  
*eFASP (0.1%DCA) (see Table 2A)*

|      |        |       |      |    |
|------|--------|-------|------|----|
| 203. | P62399 | 1,789 | 38.0 | 7  |
| 204. | P0AAC0 | 1,780 | 43.0 | 8  |
| 205. | P0ABS1 | 1,749 | 37.8 | 3  |
| 206. | P0A9T0 | 1,708 | 18.5 | 7  |
| 207. | P25665 | 1,706 | 27.1 | 18 |
| 208. | P05793 | 1,691 | 32.6 | 14 |
| 209. | P21599 | 1,671 | 37.3 | 13 |
| 210. | P0AET8 | 1,632 | 29.8 | 8  |
| 211. | P0AFC7 | 1,624 | 35.0 | 9  |
| 212. | P0A6Z3 | 1,586 | 41.4 | 22 |
| 213. | P63235 | 1,559 | 5.3  | 3  |
| 214. | P0A705 | 1,541 | 32.9 | 26 |
| 215. | P15288 | 1,535 | 22.7 | 13 |
| 216. | P0A817 | 1,535 | 40.4 | 10 |
| 217. | P27298 | 1,528 | 18.5 | 16 |
| 218. | P0ACJ8 | 1,510 | 38.6 | 6  |
| 219. | P0A867 | 1,504 | 38.9 | 12 |
| 220. | P15877 | 1,466 | 29.2 | 16 |
| 221. | P0A9K9 | 1,450 | 42.4 | 5  |
| 222. | P0AFG3 | 1,442 | 28.4 | 23 |
| 223. | P0AEP3 | 1,421 | 32.5 | 10 |
| 224. | P30859 | 1,389 | 24.7 | 6  |
| 225. | P0AG84 | 1,388 | 27.9 | 6  |
| 226. | P23843 | 1,372 | 26.3 | 13 |
| 227. | P0A8X0 | 1,361 | 11.5 | 1  |
| 228. | P0AA16 | 1,336 | 39.3 | 7  |
| 229. | P0ABA6 | 1,327 | 35.5 | 10 |
| 230. | P0A7L8 | 1,314 | 29.4 | 2  |
| 231. | P0AB52 | 1,301 | 17.1 | 2  |
| 232. | P33570 | 1,290 | 36.6 | 19 |
| 233. | P0ABC7 | 1,289 | 31.5 | 15 |
| 234. | P02930 | 1,279 | 22.3 | 13 |
| 235. | P60906 | 1,259 | 34.2 | 14 |
| 236. | P00957 | 1,250 | 40.0 | 31 |
| 237. | P0ADV7 | 1,232 | 30.8 | 10 |
| 238. | P0A8A2 | 1,226 | 29.4 | 4  |
| 239. | P25516 | 1,208 | 23.6 | 24 |
| 240. | P0A6H1 | 1,203 | 20.8 | 11 |
| 241. | P00954 | 1,185 | 32.9 | 11 |
| 242. | P0AG00 | 1,179 | 21.3 | 12 |
| 243. | P05791 | 1,142 | 29.7 | 11 |

**Documentation of Peptide and Protein Identifications**  
*eFASP (0.1%DCA) (see Table 2A)*

|      |        |       |      |    |
|------|--------|-------|------|----|
| 244. | P0AEM9 | 1,113 | 34.2 | 13 |
| 245. | P23836 | 1,112 | 42.2 | 10 |
| 246. | P00579 | 1,105 | 25.3 | 17 |
| 247. | P09424 | 1,105 | 27.0 | 7  |
| 248. | P0A6T1 | 1,097 | 26.8 | 18 |
| 249. | P0A9P4 | 1,096 | 28.7 | 6  |
| 250. | P0AFF6 | 1,089 | 31.3 | 14 |
| 251. | P10907 | 1,066 | 19.7 | 9  |
| 252. | P0A6L0 | 1,055 | 39.0 | 7  |
| 253. | P0AD96 | 1,051 | 32.7 | 7  |
| 254. | P0ACG1 | 1,048 | 32.8 | 5  |
| 255. | P33599 | 1,047 | 29.0 | 16 |
| 256. | P0ACY3 | 1,045 | 25.6 | 18 |
| 257. | P0A9M0 | 1,045 | 21.9 | 20 |
| 258. | P37689 | 1,044 | 18.5 | 13 |
| 259. | P0A8N5 | 1,037 | 33.7 | 21 |
| 260. | P0AGJ9 | 1,035 | 29.3 | 10 |
| 261. | P05055 | 1,027 | 23.6 | 16 |
| 262. | P0ABA0 | 1,007 | 23.1 | 5  |
| 263. | P0ABD5 | 1,002 | 30.1 | 11 |
| 264. | P09831 | 991   | 26.2 | 36 |
| 265. | P42620 | 986   | 22.0 | 10 |
| 266. | P23862 | 984   | 15.4 | 3  |
| 267. | P37665 | 974   | 21.9 | 4  |
| 268. | P61517 | 970   | 33.2 | 7  |
| 269. | P0AEE1 | 941   | 24.3 | 6  |
| 270. | P32132 | 927   | 10.9 | 9  |
| 271. | P27302 | 927   | 21.7 | 12 |
| 272. | P31979 | 926   | 18.4 | 11 |
| 273. | P76372 | 922   | 14.1 | 6  |
| 274. | P07014 | 900   | 13.9 | 6  |
| 275. | P36659 | 896   | 12.1 | 3  |
| 276. | P25553 | 893   | 20.7 | 12 |
| 277. | P0AAI3 | 889   | 21.7 | 16 |
| 278. | P31133 | 864   | 29.5 | 7  |
| 279. | P0A8E1 | 862   | 23.3 | 7  |
| 280. | P31057 | 858   | 20.5 | 4  |
| 281. | P0A6H5 | 850   | 21.2 | 9  |
| 282. | P0ABU5 | 848   | 34.6 | 4  |
| 283. | P0A6F3 | 842   | 25.1 | 13 |
| 284. | P45523 | 842   | 30.7 | 10 |

**Documentation of Peptide and Protein Identifications**  
*eFASP (0.1%DCA) (see Table 2A)*

|      |        |     |      |    |
|------|--------|-----|------|----|
| 285. | P10908 | 834 | 19.4 | 4  |
| 286. | P77245 | 832 | 17.5 | 5  |
| 287. | P42632 | 828 | 22.8 | 28 |
| 288. | P00956 | 819 | 23.4 | 24 |
| 289. | P12281 | 815 | 11.7 | 6  |
| 290. | P0AES6 | 812 | 14.6 | 18 |
| 291. | P07813 | 812 | 17.3 | 19 |
| 292. | P0A9K3 | 802 | 25.7 | 9  |
| 293. | P77395 | 799 | 27.5 | 6  |
| 294. | P00561 | 787 | 24.4 | 19 |
| 295. | P77581 | 783 | 21.4 | 11 |
| 296. | P23847 | 780 | 30.1 | 12 |
| 297. | P07650 | 779 | 23.0 | 14 |
| 298. | P76015 | 768 | 27.5 | 6  |
| 299. | P0A6R0 | 755 | 24.9 | 12 |
| 300. | P75691 | 753 | 7.2  | 11 |
| 301. | P21889 | 751 | 16.4 | 12 |
| 302. | P0AGJ5 | 751 | 12.2 | 5  |
| 303. | P0ADE8 | 744 | 19.3 | 9  |
| 304. | P0A8R0 | 744 | 24.2 | 3  |
| 305. | P0AFG0 | 741 | 36.5 | 7  |
| 306. | P08390 | 736 | 24.3 | 8  |
| 307. | P0AGE9 | 735 | 19.7 | 6  |
| 308. | P0A7T7 | 729 | 42.7 | 5  |
| 309. | P68066 | 725 | 18.9 | 5  |
| 310. | P06986 | 724 | 18.8 | 4  |
| 311. | P0A744 | 716 | 30.7 | 2  |
| 312. | P17169 | 715 | 30.9 | 17 |
| 313. | P76658 | 709 | 12.0 | 4  |
| 314. | P77293 | 709 | 17.3 | 5  |
| 315. | P11557 | 701 | 15.2 | 6  |
| 316. | P08191 | 693 | 25.0 | 4  |
| 317. | P21179 | 689 | 16.5 | 15 |
| 318. | P0A6K6 | 688 | 21.6 | 9  |
| 319. | P39831 | 687 | 16.9 | 6  |
| 320. | P00864 | 676 | 29.0 | 24 |
| 321. | P56262 | 659 | 11.8 | 5  |
| 322. | P25714 | 659 | 10.0 | 7  |
| 323. | P27306 | 658 | 15.0 | 7  |
| 324. | P02942 | 657 | 21.1 | 14 |
| 325. | P0AC84 | 652 | 15.9 | 4  |

**Documentation of Peptide and Protein Identifications**  
*eFASP (0.1%DCA) (see Table 2A)*

|      |        |     |      |    |
|------|--------|-----|------|----|
| 326. | P0AG07 | 649 | 32.4 | 10 |
| 327. | P68206 | 647 | 17.4 | 2  |
| 328. | P15639 | 626 | 21.7 | 11 |
| 329. | P77454 | 624 | 10.3 | 2  |
| 330. | P0AF28 | 624 | 16.7 | 4  |
| 331. | P23893 | 623 | 17.4 | 7  |
| 332. | P10100 | 617 | 20.4 | 4  |
| 333. | P37051 | 607 | 22.5 | 5  |
| 334. | P00582 | 597 | 13.6 | 19 |
| 335. | P0AC38 | 596 | 9.6  | 8  |
| 336. | P0A7E9 | 593 | 31.5 | 6  |
| 337. | P37095 | 593 | 17.6 | 9  |
| 338. | P0ABI4 | 590 | 28.5 | 7  |
| 339. | P76177 | 589 | 11.2 | 7  |
| 340. | P0AEZ3 | 589 | 16.7 | 8  |
| 341. | P0ADY1 | 570 | 34.4 | 20 |
| 342. | P45748 | 566 | 13.7 | 4  |
| 343. | P0A9X4 | 556 | 25.7 | 13 |
| 344. | P0A6E6 | 556 | 26.6 | 4  |
| 345. | P76143 | 555 | 37.1 | 9  |
| 346. | P77774 | 550 | 16.8 | 8  |
| 347. | P76108 | 549 | 23.6 | 9  |
| 348. | P16659 | 540 | 15.2 | 15 |
| 349. | P60595 | 532 | 8.7  | 2  |
| 350. | P0ACJ0 | 525 | 11.6 | 2  |
| 351. | P37636 | 524 | 30.9 | 8  |
| 352. | P15034 | 524 | 16.6 | 11 |
| 353. | P69797 | 523 | 26.6 | 7  |
| 354. | P33195 | 522 | 14.1 | 19 |
| 355. | P0ABZ6 | 521 | 20.8 | 9  |
| 356. | P0AC53 | 520 | 13.0 | 12 |
| 357. | P26646 | 515 | 15.7 | 8  |
| 358. | P0A8N3 | 511 | 8.7  | 14 |
| 359. | P0AES0 | 505 | 14.7 | 8  |
| 360. | P06611 | 503 | 19.7 | 5  |
| 361. | P0A8M3 | 502 | 7.2  | 13 |
| 362. | P0AC41 | 499 | 16.3 | 14 |
| 363. | P0A9C3 | 498 | 23.1 | 8  |
| 364. | P37613 | 494 | 11.0 | 4  |
| 365. | P04949 | 494 | 33.5 | 12 |
| 366. | P0C0K3 | 489 | 10.4 | 5  |

**Documentation of Peptide and Protein Identifications**  
*eFASP (0.1%DCA) (see Table 2A)*

|      |        |     |      |    |
|------|--------|-----|------|----|
| 367. | P77804 | 485 | 14.3 | 15 |
| 368. | P33920 | 481 | 27.5 | 13 |
| 369. | P19323 | 480 | 16.0 | 18 |
| 370. | P13029 | 473 | 10.5 | 19 |
| 371. | P0AEB2 | 472 | 18.9 | 15 |
| 372. | P37666 | 470 | 15.1 | 4  |
| 373. | P37685 | 458 | 14.5 | 8  |
| 374. | P0AF08 | 457 | 9.8  | 3  |
| 375. | P09551 | 452 | 16.2 | 9  |
| 376. | P06983 | 446 | 12.8 | 7  |
| 377. | P0ABJ1 | 437 | 13.0 | 5  |
| 378. | P37349 | 435 | 16.7 | 8  |
| 379. | P60560 | 416 | 15.6 | 5  |
| 380. | P0AFM6 | 415 | 13.5 | 12 |
| 381. | P21165 | 409 | 19.4 | 8  |
| 382. | P09155 | 405 | 20.3 | 7  |
| 383. | P0A9T4 | 401 | 16.5 | 7  |
| 384. | P04693 | 400 | 11.8 | 9  |
| 385. | P33235 | 400 | 18.1 | 10 |
| 386. | P07639 | 398 | 27.6 | 8  |
| 387. | P0A749 | 398 | 5.7  | 6  |
| 388. | P24182 | 398 | 15.1 | 12 |
| 389. | P31475 | 397 | 24.8 | 6  |
| 390. | P26616 | 394 | 8.9  | 10 |
| 391. | P77234 | 392 | 8.3  | 9  |
| 392. | P0AFQ7 | 387 | 6.4  | 5  |
| 393. | P00968 | 382 | 12.6 | 20 |
| 394. | P0A7A7 | 382 | 15.9 | 22 |
| 395. | P0AG90 | 374 | 11.9 | 11 |
| 396. | P17846 | 373 | 17.4 | 13 |
| 397. | P33022 | 372 | 11.2 | 3  |
| 398. | P21151 | 371 | 11.6 | 11 |
| 399. | P75797 | 368 | 11.7 | 12 |
| 400. | P0A879 | 367 | 10.1 | 5  |
| 401. | P0A7B1 | 362 | 11.1 | 20 |
| 402. | P00961 | 361 | 15.7 | 17 |
| 403. | P0A9B6 | 360 | 9.4  | 7  |
| 404. | P0ACB7 | 359 | 10.1 | 4  |
| 405. | P00452 | 359 | 8.4  | 11 |
| 406. | P00959 | 358 | 14.2 | 13 |
| 407. | P0ACLO | 355 | 23.0 | 4  |

**Documentation of Peptide and Protein Identifications**  
*eFASP (0.1%DCA) (see Table 2A)*

|      |        |     |      |    |
|------|--------|-----|------|----|
| 408. | P0AFK9 | 354 | 12.9 | 7  |
| 409. | P22259 | 353 | 16.3 | 14 |
| 410. | P19925 | 350 | 18.7 | 4  |
| 411. | P08506 | 349 | 23.3 | 12 |
| 412. | P41052 | 346 | 5.8  | 8  |
| 413. | P39288 | 346 | 11.9 | 4  |
| 414. | P09169 | 344 | 24.3 | 7  |
| 415. | P0AF63 | 338 | 27.0 | 4  |
| 416. | P06612 | 336 | 9.5  | 23 |
| 417. | P21513 | 336 | 13.8 | 19 |
| 418. | P76655 | 335 | 21.6 | 19 |
| 419. | P17445 | 333 | 20.8 | 13 |
| 420. | P75831 | 330 | 9.3  | 17 |
| 421. | P38038 | 328 | 18.5 | 14 |
| 422. | P0ABQ0 | 326 | 13.8 | 6  |
| 423. | P27550 | 325 | 17.9 | 11 |
| 424. | P00490 | 324 | 10.5 | 18 |
| 425. | P68187 | 320 | 24.0 | 10 |
| 426. | P00962 | 315 | 12.6 | 14 |
| 427. | P39361 | 309 | 5.8  | 6  |
| 428. | P30850 | 307 | 4.4  | 9  |
| 429. | Q57261 | 305 | 21.5 | 12 |
| 430. | P0AA53 | 304 | 15.7 | 9  |
| 431. | P76034 | 304 | 6.8  | 7  |
| 432. | P0A7E3 | 300 | 21.1 | 4  |
| 433. | P21888 | 299 | 7.8  | 8  |
| 434. | P07003 | 299 | 18.0 | 17 |
| 435. | P0AB91 | 298 | 12.6 | 7  |
| 436. | P69503 | 298 | 12.0 | 5  |
| 437. | O76011 | 297 | 18.1 | 12 |
| 438. | P15254 | 293 | 16.9 | 26 |
| 439. | P04805 | 291 | 15.5 | 10 |
| 440. | P24216 | 291 | 20.9 | 8  |
| 441. | P21499 | 291 | 6.4  | 14 |
| 442. | P31224 | 291 | 11.2 | 13 |
| 443. | P36938 | 289 | 17.6 | 7  |
| 444. | P07004 | 288 | 10.8 | 7  |
| 445. | P27296 | 287 | 10.9 | 17 |
| 446. | P36683 | 280 | 13.5 | 19 |
| 447. | P07001 | 280 | 10.4 | 6  |
| 448. | P0A993 | 279 | 6.6  | 6  |



**Documentation of Peptide and Protein Identifications**  
*eFASP (0.1%DCA) (see Table 2A)*

|      |        |     |      |    |
|------|--------|-----|------|----|
| 449. | P32721 | 279 | 11.0 | 13 |
| 450. | P60664 | 275 | 16.7 | 10 |
| 451. | P02918 | 275 | 5.7  | 16 |
| 452. | P0AAI5 | 274 | 24.7 | 8  |
| 453. | P0AGB0 | 273 | 12.4 | 2  |
| 454. | P09151 | 272 | 11.7 | 8  |
| 455. | P0CB39 | 272 | 17.7 | 8  |
| 456. | P16700 | 270 | 16.6 | 10 |
| 457. | P0AEZ1 | 268 | 12.8 | 4  |
| 458. | P0AEU0 | 265 | 26.9 | 8  |
| 459. | P0A9W3 | 265 | 8.8  | 17 |
| 460. | P39099 | 263 | 8.8  | 12 |
| 461. | P0AGG8 | 260 | 17.3 | 11 |
| 462. | P31554 | 257 | 10.1 | 11 |
| 463. | Q46855 | 256 | 12.0 | 5  |
| 464. | Q46837 | 256 | 10.3 | 33 |
| 465. | P08369 | 249 | 10.2 | 5  |
| 466. | P75876 | 246 | 11.6 | 13 |
| 467. | P24171 | 246 | 12.9 | 11 |
| 468. | P0A894 | 245 | 11.6 | 3  |
| 469. | P27848 | 239 | 16.5 | 7  |
| 470. | P42593 | 235 | 13.4 | 7  |
| 471. | Q14525 | 119 | 10.2 | 4  |

## Documentation of Peptide and Protein Identifications

*eFASP (0.1%*n*OG) (see Table 2A)*

### **eFASP (0.1%*n*OG)** (see Table 2A)

|     | Accession | Score  | Coverage, % | Peptide matches |
|-----|-----------|--------|-------------|-----------------|
| 1.  | P0A6N1    | 77,105 | 78.9        | 27              |
| 2.  | P0ADB7    | 55,065 | 85.4        | 2               |
| 3.  | P0A910    | 54,858 | 76.3        | 29              |
| 4.  | P69776    | 53,857 | 42.3        | 3               |
| 5.  | P06996    | 48,684 | 89.9        | 29              |
| 6.  | P0ABT2    | 38,530 | 68.3        | 15              |
| 7.  | P0AG82    | 35,644 | 74.9        | 32              |
| 8.  | P0AET2    | 33,197 | 82.4        | 6               |
| 9.  | P00634    | 29,725 | 81.3        | 31              |
| 10. | P0AEH5    | 29,385 | 35.6        | 3               |
| 11. | P0ACF8    | 29,321 | 64.2        | 12              |
| 12. | P0A6P9    | 27,538 | 72.5        | 23              |
| 13. | P0A9B2    | 27,018 | 60.7        | 20              |
| 14. | P0A6F9    | 26,609 | 52.6        | 4               |
| 15. | P0A8G6    | 24,982 | 53.0        | 7               |
| 16. | P0A799    | 24,744 | 59.4        | 18              |
| 17. | P0A917    | 24,146 | 53.8        | 11              |
| 18. | P0A6M8    | 20,987 | 67.2        | 40              |
| 19. | P0A905    | 20,980 | 45.8        | 5               |
| 20. | P0ACF0    | 19,539 | 61.1        | 4               |
| 21. | P00761    | 19,004 | 38.1        | 6               |
| 22. | P0A862    | 18,801 | 68.5        | 12              |
| 23. | P0AF93    | 18,480 | 64.8        | 4               |
| 24. | P0A6F5    | 17,160 | 78.3        | 34              |
| 25. | P69783    | 16,960 | 66.9        | 8               |
| 26. | P0ABB4    | 16,174 | 59.4        | 18              |
| 27. | P0AA25    | 15,665 | 71.6        | 7               |
| 28. | P0A6Y8    | 15,179 | 78.1        | 47              |
| 29. | P0C0L2    | 14,337 | 45.5        | 6               |
| 30. | P0AG86    | 13,404 | 31.6        | 3               |
| 31. | P08200    | 12,825 | 62.0        | 21              |
| 32. | P0A9P0    | 12,612 | 51.1        | 19              |
| 33. | P28635    | 12,144 | 67.5        | 12              |
| 34. | Q2M7R5    | 10,615 | 33.3        | 2               |
| 35. | P45578    | 10,352 | 61.4        | 8               |
| 36. | P0ABD3    | 9,977  | 53.8        | 7               |
| 37. | P0AE08    | 9,942  | 71.7        | 14              |
| 38. | P21420    | 9,696  | 47.1        | 14              |

**Documentation of Peptide and Protein Identifications**  
*eFASP (0.1%*n*OG) (see Table 2A)*

|     |        |       |      |    |
|-----|--------|-------|------|----|
| 39. | P0A825 | 9,395 | 40.3 | 12 |
| 40. | P0ADE6 | 9,321 | 75.2 | 10 |
| 41. | P0ACE7 | 9,272 | 59.7 | 4  |
| 42. | P0AEK4 | 9,136 | 46.6 | 12 |
| 43. | P09373 | 8,831 | 63.7 | 36 |
| 44. | P06959 | 8,702 | 52.4 | 27 |
| 45. | P02358 | 8,630 | 57.0 | 6  |
| 46. | P77717 | 8,601 | 36.3 | 2  |
| 47. | P0AB14 | 8,144 | 54.7 | 5  |
| 48. | P0AFG6 | 7,921 | 44.9 | 10 |
| 49. | P0A7R5 | 7,652 | 54.4 | 6  |
| 50. | P0A858 | 7,619 | 39.6 | 8  |
| 51. | P13979 | 7,592 | 25.0 | 6  |
| 52. | P0A7V8 | 7,402 | 34.0 | 9  |
| 53. | P0ABK5 | 7,295 | 68.4 | 15 |
| 54. | P0A7V0 | 7,294 | 65.6 | 10 |
| 55. | P0A912 | 7,180 | 69.4 | 9  |
| 56. | P0A7K2 | 7,036 | 43.0 | 6  |
| 57. | P0AFH8 | 6,903 | 61.7 | 12 |
| 58. | P69910 | 6,663 | 56.9 | 18 |
| 59. | P62707 | 6,518 | 46.0 | 9  |
| 60. | P69908 | 6,327 | 60.5 | 21 |
| 61. | P0AC69 | 6,239 | 33.9 | 3  |
| 62. | P63284 | 6,143 | 49.9 | 45 |
| 63. | P02932 | 6,098 | 69.2 | 23 |
| 64. | P0A991 | 5,924 | 42.6 | 12 |
| 65. | P0A7W1 | 5,906 | 52.1 | 8  |
| 66. | P0AG67 | 5,861 | 40.9 | 27 |
| 67. | P09372 | 5,831 | 37.6 | 6  |
| 68. | P0ADA7 | 5,820 | 63.9 | 3  |
| 69. | P0A7V3 | 5,795 | 18.0 | 4  |
| 70. | P0AG80 | 5,686 | 61.6 | 19 |
| 71. | P31658 | 5,590 | 52.3 | 12 |
| 72. | P0A7D7 | 5,556 | 34.6 | 8  |
| 73. | P60723 | 5,479 | 43.3 | 8  |
| 74. | P0A850 | 5,428 | 47.5 | 20 |
| 75. | P08839 | 5,092 | 43.7 | 21 |
| 76. | P0ABD8 | 5,035 | 44.9 | 2  |
| 77. | P0A6A8 | 4,960 | 33.3 | 3  |
| 78. | P0AE52 | 4,932 | 50.6 | 5  |
| 79. | P61889 | 4,931 | 39.1 | 11 |

**Documentation of Peptide and Protein Identifications**  
*eFASP (0.1%*n*OG) (see Table 2A)*

|      |        |       |      |    |
|------|--------|-------|------|----|
| 80.  | P0A7R1 | 4,836 | 44.3 | 6  |
| 81.  | P64581 | 4,817 | 27.7 | 3  |
| 82.  | P68919 | 4,773 | 38.3 | 3  |
| 83.  | P0AES9 | 4,757 | 59.1 | 3  |
| 84.  | P0ADY7 | 4,740 | 11.8 | 1  |
| 85.  | P0A9C5 | 4,718 | 55.4 | 16 |
| 86.  | P0AEK2 | 4,661 | 32.0 | 4  |
| 87.  | P61175 | 4,627 | 53.6 | 6  |
| 88.  | P0A7L0 | 4,544 | 47.4 | 7  |
| 89.  | P39177 | 4,440 | 71.1 | 7  |
| 90.  | P23843 | 4,423 | 42.0 | 16 |
| 91.  | P0AEU7 | 4,368 | 55.3 | 11 |
| 92.  | P0A6P1 | 4,318 | 63.3 | 18 |
| 93.  | P0AD61 | 4,221 | 58.5 | 21 |
| 94.  | P0A953 | 4,207 | 49.5 | 15 |
| 95.  | P0A9M8 | 4,099 | 39.1 | 20 |
| 96.  | P0A7J3 | 4,086 | 47.9 | 9  |
| 97.  | P00934 | 4,032 | 27.3 | 6  |
| 98.  | P60438 | 4,017 | 33.5 | 7  |
| 99.  | P0AC62 | 3,996 | 66.3 | 6  |
| 100. | P0ADB1 | 3,985 | 37.5 | 3  |
| 101. | P0A7Z4 | 3,979 | 46.2 | 17 |
| 102. | P0AG55 | 3,965 | 43.5 | 7  |
| 103. | P0ABP8 | 3,954 | 50.2 | 10 |
| 104. | P00448 | 3,908 | 48.1 | 6  |
| 105. | P0AA10 | 3,797 | 49.3 | 5  |
| 106. | P25738 | 3,738 | 41.9 | 3  |
| 107. | P62768 | 3,590 | 53.9 | 11 |
| 108. | P0AGD3 | 3,561 | 32.6 | 3  |
| 109. | P76402 | 3,530 | 31.8 | 2  |
| 110. | P0ABB0 | 3,469 | 48.9 | 26 |
| 111. | P02359 | 3,464 | 43.0 | 9  |
| 112. | P0ACX3 | 3,461 | 45.5 | 3  |
| 113. | P0AG30 | 3,373 | 43.0 | 16 |
| 114. | P0C0V0 | 3,347 | 44.7 | 16 |
| 115. | P00509 | 3,326 | 34.1 | 13 |
| 116. | P0A8G9 | 3,245 | 33.8 | 3  |
| 117. | P0A715 | 3,189 | 28.5 | 7  |
| 118. | P0ACA3 | 3,186 | 57.6 | 10 |
| 119. | P0AF70 | 3,146 | 63.3 | 3  |
| 120. | P0A8T7 | 3,114 | 38.5 | 41 |

**Documentation of Peptide and Protein Identifications**  
*eFASP (0.1%*n*OG) (see Table 2A)*

|      |        |       |      |    |
|------|--------|-------|------|----|
| 121. | P63235 | 3,099 | 10.2 | 6  |
| 122. | P0A7J7 | 3,079 | 53.5 | 6  |
| 123. | P0A8V2 | 3,064 | 36.7 | 46 |
| 124. | P15639 | 3,031 | 36.5 | 16 |
| 125. | P60422 | 3,027 | 38.5 | 8  |
| 126. | P0A7W7 | 2,994 | 36.9 | 4  |
| 127. | P0AEZ9 | 2,970 | 45.3 | 6  |
| 128. | P0A836 | 2,876 | 24.0 | 10 |
| 129. | P45523 | 2,873 | 28.5 | 8  |
| 130. | P0A6L0 | 2,853 | 32.1 | 11 |
| 131. | P0A870 | 2,837 | 47.0 | 20 |
| 132. | P0A7D4 | 2,760 | 23.6 | 11 |
| 133. | P0AAC0 | 2,593 | 32.9 | 8  |
| 134. | P0AAB8 | 2,547 | 20.4 | 4  |
| 135. | P0ADG7 | 2,472 | 59.0 | 19 |
| 136. | P0A8L1 | 2,389 | 38.1 | 15 |
| 137. | P0A7G2 | 2,379 | 30.8 | 3  |
| 138. | P0A707 | 2,370 | 50.6 | 8  |
| 139. | P61949 | 2,322 | 56.3 | 9  |
| 140. | P0ADW3 | 2,311 | 40.9 | 5  |
| 141. | P0A805 | 2,283 | 34.6 | 6  |
| 142. | P13029 | 2,239 | 24.0 | 18 |
| 143. | P0A7K6 | 2,209 | 20.0 | 2  |
| 144. | P0AGE0 | 2,196 | 24.7 | 5  |
| 145. | P0A9D8 | 2,159 | 44.5 | 12 |
| 146. | P0AFG8 | 2,156 | 34.4 | 29 |
| 147. | P12758 | 2,145 | 52.6 | 8  |
| 148. | P64519 | 2,143 | 44.0 | 2  |
| 149. | P39831 | 2,124 | 17.7 | 8  |
| 150. | P0A7U3 | 2,120 | 37.0 | 2  |
| 151. | P0ABH7 | 2,103 | 36.3 | 10 |
| 152. | P23538 | 2,069 | 26.1 | 23 |
| 153. | P0A9Q7 | 2,052 | 30.3 | 23 |
| 154. | P76335 | 2,022 | 22.9 | 7  |
| 155. | P0A998 | 1,984 | 15.2 | 6  |
| 156. | P0AAI3 | 1,983 | 31.7 | 18 |
| 157. | P0A7U7 | 1,978 | 23.0 | 2  |
| 158. | P0AEQ3 | 1,949 | 34.7 | 13 |
| 159. | P0A9Q9 | 1,930 | 32.4 | 8  |
| 160. | P0A855 | 1,902 | 43.0 | 11 |
| 161. | P0A7X3 | 1,899 | 25.4 | 5  |

**Documentation of Peptide and Protein Identifications**  
*eFASP (0.1%*n*OG) (see Table 2A)*

|      |        |       |      |    |
|------|--------|-------|------|----|
| 162. | P02930 | 1,898 | 32.3 | 13 |
| 163. | P0A6H1 | 1,894 | 29.7 | 8  |
| 164. | P61517 | 1,891 | 30.5 | 6  |
| 165. | P27302 | 1,883 | 22.3 | 16 |
| 166. | P0A6Q3 | 1,881 | 36.1 | 5  |
| 167. | P00350 | 1,870 | 46.6 | 21 |
| 168. | P0AFJ5 | 1,869 | 28.0 | 5  |
| 169. | P23847 | 1,863 | 33.8 | 14 |
| 170. | P33599 | 1,857 | 31.2 | 21 |
| 171. | P05793 | 1,842 | 36.1 | 14 |
| 172. | Q46857 | 1,839 | 44.7 | 8  |
| 173. | P0A7R9 | 1,837 | 45.7 | 4  |
| 174. | P0A877 | 1,822 | 32.1 | 6  |
| 175. | P60624 | 1,814 | 46.2 | 3  |
| 176. | P06999 | 1,801 | 29.1 | 7  |
| 177. | P0ADX7 | 1,773 | 49.3 | 7  |
| 178. | P25553 | 1,716 | 24.6 | 13 |
| 179. | P0ABD5 | 1,712 | 14.4 | 8  |
| 180. | P0AFC3 | 1,708 | 17.7 | 3  |
| 181. | P0ADU5 | 1,698 | 22.3 | 3  |
| 182. | P0A7E9 | 1,693 | 30.3 | 5  |
| 183. | P23721 | 1,672 | 27.9 | 12 |
| 184. | P75694 | 1,624 | 52.8 | 3  |
| 185. | P0AB71 | 1,604 | 38.4 | 10 |
| 186. | P0A817 | 1,588 | 35.4 | 12 |
| 187. | P77804 | 1,581 | 31.1 | 11 |
| 188. | P0A903 | 1,559 | 59.3 | 11 |
| 189. | P28304 | 1,539 | 26.9 | 6  |
| 190. | P0AG44 | 1,537 | 18.1 | 2  |
| 191. | P69441 | 1,535 | 30.4 | 9  |
| 192. | P75691 | 1,506 | 24.4 | 12 |
| 193. | P0A867 | 1,460 | 36.4 | 10 |
| 194. | P21179 | 1,449 | 14.6 | 16 |
| 195. | P0AET8 | 1,443 | 23.9 | 7  |
| 196. | P05020 | 1,440 | 32.5 | 8  |
| 197. | P0AG18 | 1,431 | 17.2 | 4  |
| 198. | P0AE12 | 1,417 | 34.9 | 12 |
| 199. | P21367 | 1,413 | 17.3 | 4  |
| 200. | P36659 | 1,379 | 29.1 | 9  |
| 201. | P33602 | 1,378 | 23.2 | 24 |
| 202. | P0A6Q6 | 1,351 | 11.9 | 3  |

**Documentation of Peptide and Protein Identifications**  
*eFASP (0.1%*n*OG) (see Table 2A)*

|      |        |       |      |    |
|------|--------|-------|------|----|
| 203. | P09169 | 1,350 | 24.9 | 10 |
| 204. | P0AFG3 | 1,341 | 24.3 | 21 |
| 205. | P32132 | 1,323 | 19.6 | 13 |
| 206. | P0A6Z3 | 1,305 | 36.1 | 21 |
| 207. | P07913 | 1,288 | 27.6 | 7  |
| 208. | P0A9Q1 | 1,281 | 40.8 | 12 |
| 209. | P0A6A3 | 1,279 | 5.8  | 3  |
| 210. | P25516 | 1,273 | 26.9 | 21 |
| 211. | P04805 | 1,259 | 26.8 | 15 |
| 212. | P10908 | 1,239 | 14.2 | 8  |
| 213. | P0A8M0 | 1,234 | 26.0 | 14 |
| 214. | P60560 | 1,221 | 15.6 | 4  |
| 215. | P0A717 | 1,176 | 17.1 | 8  |
| 216. | P0ABF6 | 1,172 | 13.3 | 4  |
| 217. | P0ABS1 | 1,169 | 11.9 | 2  |
| 218. | P04128 | 1,161 | 26.9 | 4  |
| 219. | P0ADY3 | 1,157 | 26.8 | 3  |
| 220. | P0ABU5 | 1,144 | 12.4 | 3  |
| 221. | P0A705 | 1,134 | 26.2 | 24 |
| 222. | P0AFF6 | 1,126 | 23.4 | 10 |
| 223. | P0A9P4 | 1,125 | 22.7 | 6  |
| 224. | P76177 | 1,124 | 36.6 | 9  |
| 225. | P21599 | 1,118 | 33.5 | 17 |
| 226. | P0ABC7 | 1,110 | 18.1 | 6  |
| 227. | P37636 | 1,104 | 29.6 | 8  |
| 228. | P16682 | 1,063 | 20.4 | 8  |
| 229. | P0A7F3 | 1,054 | 42.5 | 4  |
| 230. | P37051 | 1,053 | 15.4 | 7  |
| 231. | P0AGJ9 | 1,049 | 16.3 | 8  |
| 232. | P0A9D2 | 1,048 | 25.4 | 5  |
| 233. | P0A796 | 943   | 24.1 | 9  |
| 234. | P76268 | 933   | 31.6 | 10 |
| 235. | P0AA16 | 932   | 21.3 | 9  |
| 236. | P0AAH0 | 925   | 12.8 | 5  |
| 237. | P0AF24 | 920   | 26.0 | 4  |
| 238. | P05055 | 920   | 23.5 | 17 |
| 239. | P02663 | 918   | 19.4 | 3  |
| 240. | P0AB80 | 914   | 24.9 | 9  |
| 241. | P05791 | 914   | 16.6 | 12 |
| 242. | P23893 | 912   | 17.1 | 8  |
| 243. | P0AC59 | 894   | 11.2 | 4  |

**Documentation of Peptide and Protein Identifications**  
*eFASP (0.1%*n*OG) (see Table 2A)*

|      |        |     |      |    |
|------|--------|-----|------|----|
| 244. | P0AE06 | 890 | 32.5 | 15 |
| 245. | P0A6F1 | 881 | 21.2 | 9  |
| 246. | P04949 | 873 | 27.9 | 12 |
| 247. | P52697 | 864 | 31.1 | 7  |
| 248. | P08390 | 857 | 16.3 | 4  |
| 249. | P0ADC1 | 848 | 9.3  | 2  |
| 250. | P0AEE5 | 847 | 24.4 | 10 |
| 251. | P0A7E1 | 828 | 10.4 | 6  |
| 252. | P0A6H5 | 823 | 28.7 | 16 |
| 253. | P64476 | 801 | 24.2 | 2  |
| 254. | P69407 | 798 | 11.1 | 4  |
| 255. | P0ABU2 | 796 | 17.6 | 10 |
| 256. | P0A9M0 | 792 | 13.1 | 18 |
| 257. | P0ABJ1 | 791 | 11.4 | 3  |
| 258. | P0A8M3 | 784 | 9.4  | 13 |
| 259. | P07012 | 780 | 21.6 | 13 |
| 260. | P31057 | 778 | 18.6 | 4  |
| 261. | P0AAI5 | 771 | 30.5 | 7  |
| 262. | P0AES6 | 770 | 20.2 | 21 |
| 263. | P0AAI9 | 766 | 12.0 | 4  |
| 264. | P0A794 | 759 | 30.0 | 6  |
| 265. | P02931 | 748 | 22.9 | 15 |
| 266. | P0AFC7 | 741 | 21.8 | 11 |
| 267. | P31697 | 741 | 46.9 | 9  |
| 268. | P09832 | 736 | 16.3 | 12 |
| 269. | P76372 | 734 | 9.8  | 5  |
| 270. | P28861 | 734 | 9.7  | 4  |
| 271. | P0A9K9 | 730 | 23.0 | 3  |
| 272. | P0ABA6 | 711 | 10.8 | 6  |
| 273. | P33570 | 709 | 15.4 | 9  |
| 274. | P0AGJ5 | 706 | 29.9 | 11 |
| 275. | P76108 | 701 | 36.5 | 14 |
| 276. | P00561 | 692 | 23.9 | 25 |
| 277. | P0AC02 | 688 | 13.5 | 5  |
| 278. | P62399 | 686 | 33.0 | 7  |
| 279. | P11557 | 683 | 21.7 | 9  |
| 280. | P25665 | 673 | 19.1 | 21 |
| 281. | P45470 | 671 | 30.8 | 7  |
| 282. | P13482 | 659 | 21.6 | 16 |
| 283. | P00961 | 656 | 6.0  | 12 |
| 284. | P15034 | 652 | 17.7 | 14 |



**Documentation of Peptide and Protein Identifications**  
*eFASP (0.1%*n*OG) (see Table 2A)*

|      |        |     |      |    |
|------|--------|-----|------|----|
| 285. | P0A940 | 651 | 15.7 | 29 |
| 286. | P00957 | 651 | 26.7 | 30 |
| 287. | P0AC41 | 645 | 19.6 | 13 |
| 288. | P0ACG1 | 637 | 29.9 | 4  |
| 289. | P16659 | 631 | 23.8 | 18 |
| 290. | P0ADE8 | 631 | 22.4 | 10 |
| 291. | P0A8B5 | 627 | 40.4 | 5  |
| 292. | P37095 | 625 | 14.3 | 12 |
| 293. | P39187 | 622 | 17.9 | 6  |
| 294. | P0AFK9 | 619 | 18.7 | 10 |
| 295. | P17169 | 618 | 23.0 | 16 |
| 296. | P0A9A6 | 610 | 23.0 | 11 |
| 297. | P0A8W8 | 607 | 26.8 | 10 |
| 298. | P0A8N3 | 597 | 15.5 | 9  |
| 299. | P00582 | 595 | 10.8 | 17 |
| 300. | P76220 | 594 | 11.1 | 3  |
| 301. | P27306 | 592 | 21.9 | 9  |
| 302. | P77674 | 589 | 29.1 | 9  |
| 303. | P07118 | 577 | 12.2 | 23 |
| 304. | P77739 | 575 | 16.4 | 2  |
| 305. | P00960 | 572 | 6.3  | 4  |
| 306. | P0ABH0 | 569 | 12.6 | 7  |
| 307. | P17846 | 560 | 12.6 | 10 |
| 308. | P12281 | 553 | 16.6 | 5  |
| 309. | P0ADY1 | 553 | 17.3 | 15 |
| 310. | P07003 | 549 | 15.4 | 7  |
| 311. | P0A951 | 532 | 7.5  | 1  |
| 312. | P0AG93 | 531 | 14.6 | 4  |
| 313. | P24182 | 530 | 14.0 | 16 |
| 314. | P76658 | 525 | 8.6  | 7  |
| 315. | P36879 | 522 | 12.7 | 7  |
| 316. | P46853 | 521 | 14.2 | 7  |
| 317. | Q46845 | 518 | 6.9  | 3  |
| 318. | P11880 | 516 | 13.1 | 4  |
| 319. | P30859 | 515 | 24.7 | 7  |
| 320. | P09158 | 513 | 30.6 | 5  |
| 321. | P0A6U8 | 508 | 11.3 | 6  |
| 322. | P31979 | 507 | 26.3 | 16 |
| 323. | P76143 | 502 | 20.3 | 7  |
| 324. | P22106 | 501 | 12.3 | 7  |
| 325. | P0A6F3 | 501 | 13.6 | 19 |

**Documentation of Peptide and Protein Identifications**  
*eFASP (0.1%*n*OG) (see Table 2A)*

|      |        |     |      |    |
|------|--------|-----|------|----|
| 326. | P39306 | 499 | 15.8 | 4  |
| 327. | P15254 | 494 | 16.0 | 26 |
| 328. | P21499 | 494 | 14.4 | 21 |
| 329. | P0A9W3 | 493 | 11.5 | 18 |
| 330. | P65556 | 492 | 28.3 | 5  |
| 331. | P76558 | 492 | 21.6 | 12 |
| 332. | P21165 | 488 | 13.5 | 14 |
| 333. | P09831 | 488 | 10.6 | 31 |
| 334. | P24171 | 483 | 7.9  | 10 |
| 335. | P30745 | 473 | 21.9 | 12 |
| 336. | P07813 | 472 | 10.0 | 20 |
| 337. | P0A8N5 | 468 | 18.2 | 12 |
| 338. | P0ABJ9 | 466 | 9.6  | 7  |
| 339. | P42620 | 463 | 14.9 | 10 |
| 340. | P37689 | 461 | 14.2 | 11 |
| 341. | P0A6K6 | 446 | 17.0 | 8  |
| 342. | P0C960 | 446 | 14.3 | 8  |
| 343. | P0ACY3 | 445 | 12.0 | 13 |
| 344. | P07017 | 443 | 25.7 | 13 |
| 345. | P33195 | 441 | 12.6 | 17 |
| 346. | P0A7G6 | 441 | 8.2  | 5  |
| 347. | P07395 | 439 | 13.0 | 15 |
| 348. | P75792 | 431 | 28.4 | 7  |
| 349. | P00864 | 429 | 19.6 | 18 |
| 350. | P09551 | 422 | 24.2 | 14 |
| 351. | P0A9L8 | 417 | 14.5 | 5  |
| 352. | P0A894 | 411 | 15.5 | 6  |
| 353. | P25522 | 409 | 10.8 | 7  |
| 354. | P0AF12 | 408 | 11.2 | 2  |
| 355. | P0AEZ1 | 406 | 22.3 | 8  |
| 356. | P0A955 | 406 | 27.7 | 2  |
| 357. | P0AB38 | 403 | 13.6 | 4  |
| 358. | P26365 | 402 | 8.1  | 9  |
| 359. | P21513 | 393 | 12.4 | 22 |
| 360. | P0A901 | 391 | 18.6 | 5  |
| 361. | P77774 | 390 | 19.9 | 6  |
| 362. | P64451 | 384 | 22.5 | 5  |
| 363. | P0AFI7 | 383 | 17.0 | 7  |
| 364. | P0A9X4 | 382 | 21.0 | 8  |
| 365. | P0AG40 | 382 | 14.4 | 6  |
| 366. | P0AC84 | 377 | 8.8  | 3  |

**Documentation of Peptide and Protein Identifications**  
*eFASP (0.1%*n*OG) (see Table 2A)*

|      |        |     |      |    |
|------|--------|-----|------|----|
| 367. | P0A6T1 | 376 | 9.8  | 11 |
| 368. | P77171 | 360 | 10.4 | 8  |
| 369. | P15877 | 358 | 12.8 | 17 |
| 370. | P39325 | 354 | 12.9 | 4  |
| 371. | P37387 | 353 | 13.6 | 8  |
| 372. | P17993 | 350 | 24.2 | 5  |
| 373. | P16456 | 349 | 14.7 | 7  |
| 374. | P0ACB2 | 347 | 8.3  | 6  |
| 375. | P00935 | 346 | 5.2  | 6  |
| 376. | P32712 | 345 | 20.7 | 4  |
| 377. | P0A738 | 343 | 27.3 | 4  |
| 378. | P0AA97 | 341 | 10.5 | 4  |
| 379. | P0AGG8 | 336 | 14.8 | 6  |
| 380. | P0ABF1 | 327 | 14.4 | 11 |
| 381. | P11875 | 323 | 2.3  | 8  |
| 382. | P0A7A7 | 318 | 12.0 | 11 |
| 383. | P76339 | 317 | 14.4 | 13 |
| 384. | P07650 | 316 | 9.8  | 9  |
| 385. | P02662 | 315 | 29.0 | 5  |
| 386. | P06971 | 310 | 8.8  | 16 |
| 387. | P25526 | 306 | 12.0 | 8  |
| 388. | P00579 | 306 | 9.0  | 9  |
| 389. | P0AG00 | 304 | 17.8 | 11 |
| 390. | P60906 | 304 | 14.4 | 8  |
| 391. | P30749 | 297 | 26.7 | 2  |
| 392. | P30850 | 297 | 9.9  | 14 |
| 393. | P04079 | 296 | 8.8  | 5  |
| 394. | P37648 | 295 | 12.5 | 10 |
| 395. | P43672 | 294 | 5.2  | 15 |
| 396. | P0A6B7 | 292 | 20.1 | 12 |
| 397. | P0C0S1 | 291 | 12.6 | 5  |
| 398. | P77182 | 290 | 3.1  | 6  |
| 399. | P0A8G3 | 288 | 9.4  | 9  |
| 400. | P69451 | 286 | 18.7 | 8  |
| 401. | P0ADA5 | 284 | 8.9  | 4  |
| 402. | P0AFP6 | 281 | 13.4 | 3  |
| 403. | P0AB77 | 281 | 6.8  | 13 |
| 404. | P46837 | 281 | 8.3  | 20 |
| 405. | P36661 | 279 | 12.2 | 10 |
| 406. | P37624 | 49  | 0.7  | 1  |
| 407. | P42632 | 77  | 1.1  | 3  |

**Documentation of Peptide and Protein Identifications**  
*eFASP (0.1%*n*OG) (see Table 2A)*

|             |    |     |   |
|-------------|----|-----|---|
| 408. P02942 | 90 | 3.1 | 2 |
|-------------|----|-----|---|

## Documentation of Peptide and Protein Identifications

2D Clean-Up Kit (see Table 2A)

### 2D Clean-Up Kit (see Table 2A)

|     | Accession | Score  | Coverage, % | Peptide matches |
|-----|-----------|--------|-------------|-----------------|
| 1.  | P0A6N1    | 84,854 | 79.4        | 28              |
| 2.  | P0ACF8    | 55,503 | 59.1        | 8               |
| 3.  | P0ABT2    | 40,563 | 79.6        | 15              |
| 4.  | P0A910    | 38,640 | 66.5        | 22              |
| 5.  | P06996    | 35,323 | 66.5        | 19              |
| 6.  | P0A862    | 33,213 | 58.9        | 7               |
| 7.  | P0A9B2    | 30,122 | 61.3        | 18              |
| 8.  | P0A6P9    | 29,921 | 74.3        | 24              |
| 9.  | P0A6F5    | 27,102 | 75.0        | 35              |
| 10. | P00634    | 26,196 | 85.8        | 29              |
| 11. | P0ADB7    | 25,947 | 39.6        | 1               |
| 12. | P0AES9    | 25,872 | 25.5        | 1               |
| 13. | P64581    | 23,610 | 25.7        | 2               |
| 14. | P0AET2    | 22,636 | 63.0        | 6               |
| 15. | P0A799    | 21,637 | 75.5        | 23              |
| 16. | P0AG82    | 18,304 | 64.7        | 24              |
| 17. | P69783    | 17,884 | 45.0        | 7               |
| 18. | P69910    | 17,403 | 54.3        | 18              |
| 19. | P08200    | 16,527 | 55.5        | 21              |
| 20. | P0A6Y8    | 16,322 | 71.5        | 47              |
| 21. | P0ABK5    | 14,792 | 63.2        | 13              |
| 22. | P0ABD3    | 13,985 | 69.6        | 12              |
| 23. | P0A917    | 13,823 | 55.0        | 10              |
| 24. | P0A8G6    | 13,580 | 59.6        | 9               |
| 25. | P0C0L2    | 12,372 | 46.2        | 8               |
| 26. | P0A6M8    | 12,339 | 68.6        | 39              |
| 27. | P0ADB1    | 12,277 | 83.9        | 7               |
| 28. | P69776    | 11,375 | 57.7        | 5               |
| 29. | P00761    | 11,159 | 42.9        | 7               |
| 30. | P0AA25    | 10,568 | 62.4        | 6               |
| 31. | P0AEK4    | 10,042 | 50.4        | 13              |
| 32. | P77717    | 9,352  | 58.4        | 5               |
| 33. | P0A9Y6    | 9,344  | 71.0        | 6               |
| 34. | P0A912    | 9,251  | 74.0        | 9               |
| 35. | P0A9P0    | 9,150  | 42.0        | 19              |
| 36. | P61889    | 9,085  | 83.3        | 16              |
| 37. | P0ABB4    | 8,921  | 65.0        | 21              |
| 38. | P62707    | 8,713  | 49.6        | 13              |

**Documentation of Peptide and Protein Identifications**  
*2D Clean-Up Kit (see Table 2A)*

|     |        |       |      |    |
|-----|--------|-------|------|----|
| 39. | P0A6F9 | 8,695 | 70.1 | 7  |
| 40. | P0A870 | 7,949 | 65.6 | 19 |
| 41. | P0AB71 | 7,767 | 48.8 | 12 |
| 42. | P0A7V0 | 7,690 | 78.0 | 15 |
| 43. | P0AFG6 | 7,507 | 39.5 | 13 |
| 44. | P0ACF0 | 7,445 | 57.8 | 6  |
| 45. | P0ADE6 | 7,196 | 83.2 | 11 |
| 46. | P0A6A8 | 6,961 | 33.3 | 3  |
| 47. | P0AG80 | 6,802 | 54.1 | 18 |
| 48. | P21420 | 6,780 | 37.8 | 11 |
| 49. | P0A825 | 6,651 | 49.4 | 16 |
| 50. | P28635 | 6,600 | 73.1 | 14 |
| 51. | P63284 | 6,525 | 63.4 | 49 |
| 52. | P0AF70 | 6,461 | 63.3 | 3  |
| 53. | P0AGD3 | 6,446 | 73.1 | 10 |
| 54. | P0AEH5 | 6,330 | 71.3 | 4  |
| 55. | P0AE08 | 5,997 | 60.4 | 9  |
| 56. | P00448 | 5,881 | 30.1 | 5  |
| 57. | P09373 | 5,862 | 65.7 | 40 |
| 58. | P0A867 | 5,861 | 63.6 | 16 |
| 59. | P0AF93 | 5,426 | 54.7 | 3  |
| 60. | P0A7Z4 | 5,377 | 58.1 | 15 |
| 61. | P68206 | 5,302 | 76.8 | 6  |
| 62. | P00350 | 5,288 | 53.2 | 20 |
| 63. | P60438 | 5,254 | 31.1 | 4  |
| 64. | P09372 | 5,066 | 47.2 | 8  |
| 65. | P0A7J3 | 5,042 | 69.7 | 11 |
| 66. | P0A905 | 4,966 | 45.8 | 5  |
| 67. | P0A7R5 | 4,908 | 48.5 | 4  |
| 68. | P0AG55 | 4,872 | 35.6 | 6  |
| 69. | P02359 | 4,821 | 49.7 | 10 |
| 70. | P0A850 | 4,802 | 48.2 | 18 |
| 71. | P0AC62 | 4,744 | 41.0 | 2  |
| 72. | P0A6P1 | 4,652 | 59.7 | 17 |
| 73. | P0A7K6 | 4,528 | 32.2 | 4  |
| 74. | P04128 | 4,464 | 40.7 | 4  |
| 75. | P0A9D8 | 4,342 | 34.7 | 8  |
| 76. | P0A7V8 | 4,235 | 33.0 | 9  |
| 77. | P0A7M6 | 4,225 | 49.2 | 3  |
| 78. | P0ABB0 | 4,190 | 62.8 | 26 |
| 79. | P0A858 | 4,114 | 52.9 | 13 |

**Documentation of Peptide and Protein Identifications**  
*2D Clean-Up Kit (see Table 2A)*

|      |        |       |      |    |
|------|--------|-------|------|----|
| 80.  | P0AEU7 | 4,113 | 41.6 | 6  |
| 81.  | P0A717 | 4,102 | 47.6 | 13 |
| 82.  | P45578 | 4,085 | 40.9 | 6  |
| 83.  | P0A7R1 | 4,020 | 70.5 | 11 |
| 84.  | P61714 | 3,936 | 59.6 | 8  |
| 85.  | P0A7D4 | 3,878 | 47.2 | 18 |
| 86.  | P60723 | 3,707 | 27.9 | 4  |
| 87.  | P0A8E7 | 3,695 | 78.5 | 11 |
| 88.  | P0AD61 | 3,610 | 52.6 | 17 |
| 89.  | P0A7D7 | 3,579 | 41.4 | 13 |
| 90.  | P39177 | 3,550 | 33.8 | 3  |
| 91.  | P0AFG8 | 3,526 | 47.0 | 37 |
| 92.  | P0AEK2 | 3,516 | 51.6 | 10 |
| 93.  | P0A7W1 | 3,507 | 52.1 | 7  |
| 94.  | P0AC59 | 3,478 | 56.3 | 11 |
| 95.  | P0AAH0 | 3,453 | 43.6 | 10 |
| 96.  | P0A7J7 | 3,439 | 43.7 | 5  |
| 97.  | P12758 | 3,249 | 52.6 | 10 |
| 98.  | P0A7S9 | 3,244 | 50.0 | 8  |
| 99.  | P0A7L0 | 3,219 | 41.0 | 8  |
| 100. | P00509 | 3,203 | 59.9 | 20 |
| 101. | P0A836 | 3,166 | 45.4 | 17 |
| 102. | P0C0S1 | 3,112 | 37.8 | 8  |
| 103. | P08839 | 3,103 | 42.8 | 21 |
| 104. | P0AB14 | 3,043 | 41.3 | 2  |
| 105. | P13979 | 2,888 | 36.5 | 9  |
| 106. | P0AG86 | 2,864 | 28.4 | 4  |
| 107. | P23538 | 2,765 | 39.7 | 26 |
| 108. | P0A953 | 2,720 | 31.8 | 12 |
| 109. | P0ABH7 | 2,694 | 38.4 | 12 |
| 110. | P76402 | 2,677 | 31.8 | 3  |
| 111. | P0ACF4 | 2,672 | 60.0 | 6  |
| 112. | P0A707 | 2,546 | 56.7 | 11 |
| 113. | P21367 | 2,487 | 59.1 | 9  |
| 114. | P0ADW3 | 2,482 | 45.5 | 6  |
| 115. | P0A805 | 2,479 | 44.9 | 7  |
| 116. | P0A8V2 | 2,407 | 31.0 | 37 |
| 117. | P0A9K7 | 2,400 | 61.0 | 15 |
| 118. | P23843 | 2,385 | 28.4 | 16 |
| 119. | P0ABP8 | 2,378 | 43.5 | 14 |
| 120. | P0A9Q7 | 2,360 | 40.3 | 35 |

**Documentation of Peptide and Protein Identifications**  
*2D Clean-Up Kit (see Table 2A)*

|      |        |       |      |    |
|------|--------|-------|------|----|
| 121. | P0A955 | 2,343 | 37.1 | 5  |
| 122. | P0AFH8 | 2,313 | 50.8 | 9  |
| 123. | P0A7V3 | 2,311 | 39.9 | 9  |
| 124. | P02932 | 2,300 | 43.6 | 15 |
| 125. | P0A991 | 2,238 | 33.7 | 10 |
| 126. | P25553 | 2,182 | 43.6 | 19 |
| 127. | P0AGE9 | 2,174 | 33.2 | 7  |
| 128. | P69411 | 2,169 | 60.5 | 7  |
| 129. | P12994 | 2,168 | 13.3 | 1  |
| 130. | P0ACA3 | 2,164 | 51.9 | 9  |
| 131. | P0A6X7 | 2,140 | 29.3 | 4  |
| 132. | P21599 | 2,118 | 34.4 | 15 |
| 133. | P61175 | 2,052 | 45.5 | 4  |
| 134. | P0A7W7 | 2,039 | 36.9 | 7  |
| 135. | P0A9C5 | 2,019 | 45.2 | 15 |
| 136. | P0A9K9 | 2,011 | 11.7 | 2  |
| 137. | P0A7T3 | 1,879 | 15.9 | 1  |
| 138. | P23721 | 1,872 | 27.4 | 10 |
| 139. | P0A715 | 1,869 | 18.3 | 4  |
| 140. | P0A6Y1 | 1,850 | 19.2 | 3  |
| 141. | P23869 | 1,817 | 53.1 | 9  |
| 142. | P30859 | 1,800 | 43.2 | 8  |
| 143. | P0ACJ8 | 1,787 | 35.7 | 10 |
| 144. | P0A9Q1 | 1,747 | 40.8 | 10 |
| 145. | P0A6Z3 | 1,741 | 43.0 | 23 |
| 146. | P0AG67 | 1,740 | 31.1 | 24 |
| 147. | P0AE12 | 1,705 | 29.3 | 10 |
| 148. | P00934 | 1,695 | 39.0 | 12 |
| 149. | P06959 | 1,680 | 31.6 | 18 |
| 150. | P0ADY7 | 1,677 | 36.0 | 7  |
| 151. | P62399 | 1,605 | 31.3 | 6  |
| 152. | P0AA16 | 1,594 | 46.9 | 13 |
| 153. | Q46857 | 1,584 | 19.3 | 4  |
| 154. | P23847 | 1,568 | 35.1 | 16 |
| 155. | P0A9T0 | 1,555 | 21.2 | 8  |
| 156. | P0AE52 | 1,550 | 21.8 | 2  |
| 157. | P0ABJ1 | 1,547 | 31.8 | 8  |
| 158. | P60422 | 1,547 | 26.7 | 9  |
| 159. | P0A8L1 | 1,528 | 34.7 | 12 |
| 160. | P0AAI9 | 1,527 | 21.7 | 4  |
| 161. | P0AEZ9 | 1,483 | 32.9 | 7  |



**Documentation of Peptide and Protein Identifications**  
*2D Clean-Up Kit (see Table 2A)*

|      |        |       |      |    |
|------|--------|-------|------|----|
| 162. | P0ADY3 | 1,467 | 38.2 | 5  |
| 163. | P33602 | 1,432 | 24.2 | 18 |
| 164. | P02930 | 1,429 | 23.9 | 11 |
| 165. | P0AA10 | 1,395 | 47.9 | 7  |
| 166. | P28304 | 1,380 | 29.1 | 6  |
| 167. | P31658 | 1,371 | 25.4 | 12 |
| 168. | P0A8T7 | 1,341 | 24.7 | 41 |
| 169. | P0ABD5 | 1,315 | 19.1 | 6  |
| 170. | P25516 | 1,292 | 24.1 | 18 |
| 171. | P0ABD8 | 1,261 | 35.3 | 5  |
| 172. | P0A6A3 | 1,260 | 33.3 | 10 |
| 173. | P0A7T7 | 1,187 | 37.3 | 3  |
| 174. | P0A9Q9 | 1,155 | 31.3 | 9  |
| 175. | P0A8M0 | 1,151 | 27.7 | 14 |
| 176. | P0AEQ3 | 1,131 | 28.6 | 6  |
| 177. | P0A8W8 | 1,130 | 35.4 | 11 |
| 178. | P52697 | 1,109 | 21.2 | 5  |
| 179. | P63235 | 1,108 | 8.6  | 6  |
| 180. | P0AAX8 | 1,094 | 21.6 | 6  |
| 181. | P15288 | 1,086 | 14.9 | 9  |
| 182. | P09551 | 1,086 | 43.5 | 14 |
| 183. | P0AG30 | 1,061 | 13.8 | 8  |
| 184. | P39173 | 1,051 | 11.6 | 6  |
| 185. | P05791 | 999   | 23.2 | 15 |
| 186. | P61517 | 982   | 28.6 | 7  |
| 187. | P0AEP3 | 978   | 25.8 | 9  |
| 188. | P0A6H5 | 969   | 29.6 | 17 |
| 189. | P0A6K6 | 968   | 21.1 | 11 |
| 190. | P0AEM9 | 955   | 33.1 | 13 |
| 191. | P0A9M8 | 940   | 24.8 | 17 |
| 192. | P75691 | 939   | 24.6 | 11 |
| 193. | P0A908 | 931   | 5.2  | 4  |
| 194. | P02358 | 926   | 17.8 | 5  |
| 195. | P69441 | 925   | 34.6 | 7  |
| 196. | P25665 | 917   | 16.1 | 16 |
| 197. | P0AED0 | 912   | 9.0  | 2  |
| 198. | P0A6F3 | 903   | 21.5 | 13 |
| 199. | P0AGE6 | 901   | 46.3 | 4  |
| 200. | P0AFG3 | 889   | 14.9 | 13 |
| 201. | P0A855 | 870   | 12.1 | 8  |
| 202. | P0A6T1 | 866   | 22.0 | 16 |

**Documentation of Peptide and Protein Identifications**  
*2D Clean-Up Kit (see Table 2A)*

|      |        |     |      |    |
|------|--------|-----|------|----|
| 203. | P0AET8 | 854 | 31.8 | 9  |
| 204. | P36659 | 851 | 26.1 | 6  |
| 205. | P0AGJ9 | 828 | 22.4 | 11 |
| 206. | P27302 | 824 | 14.3 | 18 |
| 207. | P37095 | 819 | 23.7 | 13 |
| 208. | P39831 | 810 | 17.7 | 8  |
| 209. | P37666 | 792 | 11.7 | 5  |
| 210. | P31663 | 786 | 20.9 | 14 |
| 211. | P0ACG1 | 774 | 33.6 | 5  |
| 212. | P37194 | 740 | 24.5 | 3  |
| 213. | P07813 | 731 | 21.2 | 16 |
| 214. | P0AAC0 | 731 | 23.1 | 7  |
| 215. | P0A903 | 718 | 31.4 | 9  |
| 216. | P0A9A6 | 716 | 34.2 | 9  |
| 217. | P0AG07 | 712 | 28.0 | 5  |
| 218. | P0AG48 | 691 | 15.5 | 3  |
| 219. | P76015 | 675 | 24.4 | 9  |
| 220. | P00561 | 669 | 16.7 | 18 |
| 221. | P0ABJ9 | 664 | 10.5 | 9  |
| 222. | P0AFD1 | 664 | 19.9 | 5  |
| 223. | P0C0V0 | 664 | 17.1 | 14 |
| 224. | P05055 | 660 | 16.3 | 14 |
| 225. | P06999 | 652 | 16.5 | 4  |
| 226. | P0AG84 | 647 | 16.3 | 4  |
| 227. | P0ACE7 | 646 | 25.2 | 3  |
| 228. | P0AE06 | 643 | 14.6 | 6  |
| 229. | P0A7Z0 | 635 | 13.7 | 4  |
| 230. | P0A7G6 | 628 | 21.0 | 10 |
| 231. | P0ADG7 | 625 | 17.4 | 9  |
| 232. | P15877 | 621 | 13.9 | 13 |
| 233. | P0A9X4 | 608 | 18.4 | 9  |
| 234. | P0ADX7 | 605 | 22.6 | 6  |
| 235. | P77804 | 604 | 21.9 | 17 |
| 236. | P02413 | 602 | 24.3 | 9  |
| 237. | P05793 | 598 | 22.6 | 14 |
| 238. | P0AB80 | 598 | 14.9 | 8  |
| 239. | P76108 | 591 | 25.2 | 10 |
| 240. | P26646 | 587 | 11.1 | 5  |
| 241. | P0ABF6 | 585 | 17.4 | 6  |
| 242. | P0AFF6 | 583 | 19.4 | 11 |
| 243. | P10907 | 577 | 9.0  | 5  |

**Documentation of Peptide and Protein Identifications**  
*2D Clean-Up Kit (see Table 2A)*

|      |        |     |      |    |
|------|--------|-----|------|----|
| 244. | P0AAI3 | 576 | 11.3 | 12 |
| 245. | P00959 | 568 | 18.2 | 20 |
| 246. | P25526 | 560 | 17.2 | 9  |
| 247. | P00961 | 558 | 16.7 | 23 |
| 248. | P0AF28 | 557 | 19.9 | 3  |
| 249. | P0A8N3 | 552 | 9.1  | 12 |
| 250. | P0AC53 | 545 | 25.3 | 15 |
| 251. | P0ACU5 | 538 | 25.6 | 12 |
| 252. | P00888 | 534 | 22.2 | 10 |
| 253. | P33599 | 534 | 15.1 | 15 |
| 254. | Q46856 | 533 | 10.6 | 4  |
| 255. | P31979 | 533 | 18.7 | 12 |
| 256. | P76422 | 533 | 22.2 | 6  |
| 257. | P04079 | 517 | 11.1 | 9  |
| 258. | P0AEZ3 | 506 | 13.7 | 8  |
| 259. | P00957 | 505 | 13.4 | 19 |
| 260. | P33570 | 491 | 13.5 | 13 |
| 261. | P15639 | 487 | 25.0 | 13 |
| 262. | P45523 | 483 | 14.4 | 8  |
| 263. | P21889 | 476 | 15.4 | 20 |
| 264. | P16659 | 472 | 8.0  | 7  |
| 265. | P07913 | 469 | 8.5  | 5  |
| 266. | P15034 | 467 | 21.1 | 10 |
| 267. | P39377 | 465 | 14.4 | 9  |
| 268. | P21179 | 461 | 12.4 | 13 |
| 269. | P17169 | 459 | 18.9 | 11 |
| 270. | P00864 | 456 | 17.7 | 25 |
| 271. | P25714 | 453 | 14.4 | 9  |
| 272. | P76658 | 449 | 17.8 | 10 |
| 273. | P22106 | 448 | 11.4 | 16 |
| 274. | P0A7I4 | 445 | 11.5 | 13 |
| 275. | P36683 | 430 | 14.6 | 15 |
| 276. | P42620 | 427 | 24.7 | 10 |
| 277. | P0A8N5 | 427 | 10.3 | 12 |
| 278. | P0A940 | 422 | 15.3 | 17 |
| 279. | P33360 | 422 | 19.8 | 3  |
| 280. | P0AAI5 | 421 | 21.8 | 10 |
| 281. | P00956 | 418 | 12.7 | 22 |
| 282. | P0ACJ0 | 417 | 13.4 | 5  |
| 283. | P00960 | 416 | 15.5 | 4  |
| 284. | P46144 | 415 | 18.2 | 2  |

**Documentation of Peptide and Protein Identifications**  
*2D Clean-Up Kit (see Table 2A)*

|      |        |     |      |    |
|------|--------|-----|------|----|
| 285. | P11557 | 414 | 10.8 | 8  |
| 286. | P17846 | 407 | 8.4  | 15 |
| 287. | P76113 | 405 | 14.5 | 7  |
| 288. | P0A8P3 | 404 | 15.4 | 2  |
| 289. | P0AC41 | 401 | 12.2 | 11 |
| 290. | P09831 | 400 | 12.6 | 31 |
| 291. | P0AES6 | 392 | 15.1 | 17 |
| 292. | P37689 | 391 | 16.9 | 9  |
| 293. | P27298 | 390 | 11.5 | 12 |
| 294. | P0ACY3 | 386 | 20.5 | 19 |
| 295. | P0A7A7 | 384 | 9.8  | 16 |
| 296. | P31677 | 379 | 8.9  | 7  |
| 297. | P30178 | 376 | 15.5 | 4  |
| 298. | P00954 | 372 | 12.6 | 6  |
| 299. | P00370 | 371 | 12.5 | 9  |
| 300. | P10408 | 368 | 18.7 | 24 |
| 301. | P76116 | 366 | 11.6 | 6  |
| 302. | P07650 | 364 | 8.2  | 10 |
| 303. | P27278 | 362 | 14.9 | 6  |
| 304. | P0A9M2 | 358 | 38.2 | 8  |
| 305. | P75882 | 354 | 5.7  | 13 |
| 306. | P39293 | 350 | 7.8  | 6  |
| 307. | P00914 | 347 | 6.6  | 11 |
| 308. | P02931 | 344 | 14.4 | 7  |
| 309. | P07003 | 344 | 14.9 | 13 |
| 310. | P15640 | 343 | 13.3 | 6  |
| 311. | P00968 | 337 | 12.2 | 22 |
| 312. | P0A9M0 | 328 | 8.6  | 20 |
| 313. | P0A7E5 | 327 | 4.6  | 5  |
| 314. | P68767 | 327 | 8.8  | 9  |
| 315. | P0A9C3 | 324 | 9.0  | 5  |
| 316. | P68066 | 324 | 27.6 | 6  |
| 317. | P24171 | 322 | 9.5  | 13 |
| 318. | P77774 | 321 | 14.0 | 10 |
| 319. | P76316 | 318 | 4.6  | 5  |
| 320. | P08312 | 310 | 24.5 | 12 |
| 321. | P76335 | 310 | 9.3  | 6  |
| 322. | P04846 | 308 | 21.3 | 5  |
| 323. | P0A6L2 | 303 | 14.7 | 7  |
| 324. | P17445 | 300 | 15.9 | 12 |
| 325. | P15254 | 299 | 13.7 | 19 |

**Documentation of Peptide and Protein Identifications**  
*2D Clean-Up Kit (see Table 2A)*

|      |        |     |      |    |
|------|--------|-----|------|----|
| 326. | P0A921 | 294 | 10.4 | 5  |
| 327. | P0A9V1 | 293 | 16.2 | 5  |
| 328. | P42915 | 292 | 5.1  | 8  |
| 329. | P10371 | 290 | 6.1  | 2  |
| 330. | Q46834 | 289 | 10.8 | 8  |
| 331. | P0ABU0 | 288 | 8.1  | 5  |
| 332. | P76558 | 285 | 9.6  | 9  |
| 333. | P37647 | 281 | 4.9  | 4  |
| 334. | P04825 | 275 | 13.3 | 22 |
| 335. | P04951 | 273 | 26.2 | 6  |
| 336. | P07001 | 266 | 7.3  | 6  |
| 337. | P52647 | 266 | 7.7  | 18 |
| 338. | P37349 | 265 | 9.1  | 2  |
| 339. | P09980 | 251 | 4.6  | 12 |
| 340. | P39360 | 250 | 13.4 | 4  |
| 341. | P33195 | 246 | 11.7 | 16 |
| 342. | P75828 | 246 | 3.6  | 8  |
| 343. | P77306 | 245 | 9.8  | 12 |
| 344. | P31120 | 245 | 7.2  | 9  |

## Documentation of Peptide and Protein Identifications

*eFASP-0.1%*n*OG* (see Table 3A)

### **eFASP-0.1%*n*OG** (see Table 3A)

|     | Accession | Score  | Coverage, % | Peptide matches |
|-----|-----------|--------|-------------|-----------------|
| 1.  | P0A6N1    | 67,292 | 79.4        | 26              |
| 2.  | P0ABT2    | 58,092 | 68.9        | 12              |
| 3.  | P0AEH5    | 48,112 | 50.5        | 4               |
| 4.  | P69776    | 40,775 | 48.7        | 3               |
| 5.  | P0A910    | 39,222 | 68.8        | 20              |
| 6.  | P69783    | 35,478 | 64.5        | 9               |
| 7.  | P0ACF0    | 32,848 | 63.3        | 4               |
| 8.  | P0A9B2    | 30,442 | 57.4        | 20              |
| 9.  | P0AG82    | 29,904 | 76.3        | 24              |
| 10. | P0ADB7    | 29,140 | 39.6        | 1               |
| 11. | P64581    | 27,540 | 36.6        | 3               |
| 12. | P0ACF8    | 25,276 | 59.9        | 9               |
| 13. | P0AET2    | 22,569 | 64.8        | 5               |
| 14. | P0A862    | 21,939 | 78.6        | 10              |
| 15. | P0ABD3    | 21,669 | 60.8        | 7               |
| 16. | P62707    | 19,770 | 48.4        | 11              |
| 17. | P06996    | 17,545 | 62.7        | 19              |
| 18. | P0A799    | 16,073 | 43.9        | 17              |
| 19. | P28635    | 15,916 | 69.0        | 14              |
| 20. | P0C0L2    | 15,893 | 57.3        | 8               |
| 21. | P0A8G6    | 14,011 | 59.1        | 13              |
| 22. | P0A6P9    | 13,337 | 53.7        | 19              |
| 23. | P0A6F5    | 13,329 | 57.3        | 25              |
| 24. | P0AG86    | 12,275 | 25.2        | 3               |
| 25. | P0AA25    | 12,094 | 62.4        | 6               |
| 26. | P00634    | 10,963 | 63.9        | 25              |
| 27. | P0ABK5    | 10,507 | 57.9        | 14              |
| 28. | P0A917    | 10,451 | 39.8        | 7               |
| 29. | P0AE08    | 9,027  | 30.5        | 4               |
| 30. | P0A6Y8    | 8,847  | 79.9        | 40              |
| 31. | P0A6M8    | 8,777  | 52.1        | 30              |
| 32. | P69910    | 8,634  | 46.1        | 18              |
| 33. | P63284    | 7,677  | 58.0        | 41              |
| 34. | P0A9Y6    | 7,664  | 78.3        | 7               |
| 35. | P0A6A8    | 7,514  | 33.3        | 3               |
| 36. | P77717    | 7,462  | 76.8        | 6               |
| 37. | P0A905    | 7,027  | 34.8        | 5               |
| 38. | P08200    | 7,013  | 35.8        | 12              |

**Documentation of Peptide and Protein Identifications**  
*eFASP-0.1%*n*OG (see Table 3A)*

|     |        |       |      |    |
|-----|--------|-------|------|----|
| 39. | P68699 | 7,005 | 11.4 | 1  |
| 40. | P0AG55 | 6,753 | 36.7 | 5  |
| 41. | P00761 | 6,617 | 16.5 | 5  |
| 42. | P09372 | 6,476 | 27.9 | 7  |
| 43. | P0A9D8 | 6,435 | 24.1 | 5  |
| 44. | P0A7V3 | 6,426 | 22.3 | 5  |
| 45. | P0ADE6 | 6,284 | 65.1 | 8  |
| 46. | P0A7K2 | 6,254 | 68.6 | 11 |
| 47. | P0A9P0 | 6,051 | 33.8 | 14 |
| 48. | P0A7R5 | 5,974 | 48.5 | 4  |
| 49. | Q2M7R5 | 5,971 | 65.2 | 3  |
| 50. | P0ABB4 | 5,788 | 42.4 | 16 |
| 51. | P0A7D7 | 5,670 | 38.8 | 11 |
| 52. | P02359 | 5,632 | 33.0 | 7  |
| 53. | P0A7J3 | 5,431 | 46.1 | 7  |
| 54. | P0A858 | 5,098 | 58.0 | 12 |
| 55. | P0AGD3 | 5,093 | 26.9 | 3  |
| 56. | P0A6X7 | 4,972 | 20.2 | 4  |
| 57. | P0AB71 | 4,959 | 24.0 | 8  |
| 58. | P60723 | 4,955 | 32.3 | 6  |
| 59. | P0A715 | 4,777 | 26.8 | 10 |
| 60. | P0A7S9 | 4,742 | 34.8 | 4  |
| 61. | P0AD61 | 4,730 | 44.7 | 18 |
| 62. | P0A850 | 4,695 | 44.4 | 20 |
| 63. | P0A7V8 | 4,625 | 35.0 | 7  |
| 64. | P0A805 | 4,465 | 43.2 | 8  |
| 65. | P09373 | 4,435 | 42.9 | 28 |
| 66. | P0ABB0 | 4,434 | 42.9 | 23 |
| 67. | P0A7V0 | 4,406 | 35.7 | 6  |
| 68. | P0A7J7 | 4,366 | 57.0 | 6  |
| 69. | P0A836 | 4,236 | 32.7 | 9  |
| 70. | P0AFG8 | 4,140 | 45.4 | 35 |
| 71. | P0ABD8 | 3,892 | 18.6 | 2  |
| 72. | P08839 | 3,715 | 35.3 | 19 |
| 73. | P00509 | 3,478 | 39.1 | 18 |
| 74. | P0A6P1 | 3,472 | 56.2 | 16 |
| 75. | P00448 | 3,428 | 48.5 | 7  |
| 76. | P06959 | 3,420 | 31.8 | 21 |
| 77. | P0ABP8 | 3,184 | 29.7 | 7  |
| 78. | P0A9Q9 | 3,142 | 21.0 | 6  |
| 79. | P0A7L0 | 3,115 | 38.5 | 9  |

**Documentation of Peptide and Protein Identifications**  
*eFASP-0.1%*n*OG (see Table 3A)*

|      |        |       |      |    |
|------|--------|-------|------|----|
| 80.  | P0A7X3 | 3,102 | 16.9 | 5  |
| 81.  | P13979 | 3,081 | 33.6 | 8  |
| 82.  | P0A9C5 | 3,050 | 47.8 | 16 |
| 83.  | P0ADW3 | 2,896 | 50.0 | 5  |
| 84.  | P0AG67 | 2,894 | 29.3 | 16 |
| 85.  | P0A7R1 | 2,851 | 52.4 | 10 |
| 86.  | P00489 | 2,756 | 31.6 | 31 |
| 87.  | P0A870 | 2,695 | 41.3 | 13 |
| 88.  | P0A6F9 | 2,546 | 27.8 | 2  |
| 89.  | P02358 | 2,437 | 43.7 | 6  |
| 90.  | P0AG30 | 2,412 | 24.6 | 15 |
| 91.  | P0AEK4 | 2,280 | 50.8 | 14 |
| 92.  | P0AEQ3 | 2,254 | 38.7 | 11 |
| 93.  | P0A8T5 | 2,221 | 85.6 | 5  |
| 94.  | P61889 | 2,166 | 33.0 | 10 |
| 95.  | P0AGE9 | 2,158 | 31.8 | 8  |
| 96.  | P61714 | 2,153 | 37.8 | 4  |
| 97.  | P0AFH8 | 2,152 | 28.9 | 6  |
| 98.  | P0A7R9 | 2,104 | 48.8 | 6  |
| 99.  | P0AG80 | 2,062 | 24.7 | 14 |
| 100. | P0A991 | 2,027 | 25.1 | 6  |
| 101. | P0AFG6 | 2,017 | 23.7 | 10 |
| 102. | P0ACA3 | 2,003 | 20.8 | 4  |
| 103. | P0AG48 | 1,977 | 24.3 | 2  |
| 104. | P00350 | 1,973 | 43.2 | 17 |
| 105. | P0A8T7 | 1,965 | 27.1 | 30 |
| 106. | P69441 | 1,959 | 28.5 | 10 |
| 107. | P0ABD5 | 1,946 | 32.0 | 11 |
| 108. | P0ACA7 | 1,881 | 9.1  | 5  |
| 109. | P37051 | 1,804 | 23.2 | 8  |
| 110. | P0A6Y1 | 1,778 | 11.7 | 2  |
| 111. | P0ADB1 | 1,726 | 27.7 | 4  |
| 112. | P31663 | 1,709 | 21.9 | 8  |
| 113. | P31658 | 1,655 | 19.8 | 9  |
| 114. | P0A7Z4 | 1,642 | 38.9 | 15 |
| 115. | P0A8V2 | 1,584 | 30.3 | 43 |
| 116. | P0A7W1 | 1,519 | 42.5 | 9  |
| 117. | P0AC59 | 1,502 | 46.1 | 11 |
| 118. | P0A953 | 1,446 | 21.9 | 11 |
| 119. | P0A6T9 | 1,405 | 19.4 | 3  |
| 120. | P0AAC0 | 1,364 | 17.4 | 6  |



**Documentation of Peptide and Protein Identifications**  
*eFASP-0.1%*n*OG (see Table 3A)*

|      |        |       |      |    |
|------|--------|-------|------|----|
| 121. | P0ADN2 | 1,360 | 30.4 | 7  |
| 122. | P0AAI3 | 1,323 | 16.2 | 18 |
| 123. | P0ACE7 | 1,287 | 25.2 | 3  |
| 124. | P60438 | 1,283 | 30.1 | 9  |
| 125. | P39199 | 1,267 | 8.7  | 2  |
| 126. | P0A912 | 1,264 | 39.9 | 6  |
| 127. | P0ADG7 | 1,232 | 19.3 | 15 |
| 128. | P62768 | 1,224 | 34.4 | 8  |
| 129. | P69407 | 1,220 | 13.4 | 4  |
| 130. | P06999 | 1,134 | 26.5 | 5  |
| 131. | P23721 | 1,126 | 27.4 | 13 |
| 132. | P0A867 | 1,120 | 26.9 | 8  |
| 133. | P0AEU7 | 1,110 | 22.4 | 6  |
| 134. | P02932 | 1,092 | 33.1 | 12 |
| 135. | P0ABH7 | 1,089 | 17.1 | 12 |
| 136. | P0A825 | 1,076 | 17.8 | 12 |
| 137. | P39831 | 1,060 | 32.7 | 9  |
| 138. | P0A6Z3 | 1,037 | 12.2 | 17 |
| 139. | P33599 | 1,012 | 13.8 | 13 |
| 140. | P0A6H1 | 1,010 | 16.3 | 11 |
| 141. | P67910 | 1,003 | 20.0 | 11 |
| 142. | P21889 | 993   | 13.6 | 19 |
| 143. | P0AAN9 | 982   | 31.4 | 2  |
| 144. | P0A7D4 | 969   | 28.0 | 15 |
| 145. | P0A8M0 | 966   | 14.8 | 15 |
| 146. | P0A9M8 | 964   | 11.6 | 17 |
| 147. | P77774 | 946   | 8.9  | 7  |
| 148. | P0ACG1 | 926   | 29.1 | 5  |
| 149. | P63235 | 923   | 7.2  | 3  |
| 150. | P62399 | 882   | 20.1 | 3  |
| 151. | P21179 | 878   | 9.3  | 13 |
| 152. | P05793 | 842   | 19.8 | 17 |
| 153. | P0A9V8 | 839   | 36.6 | 10 |
| 154. | P75691 | 833   | 18.3 | 7  |
| 155. | P0A707 | 821   | 27.2 | 9  |
| 156. | P0A6E9 | 819   | 5.6  | 3  |
| 157. | P0AD96 | 809   | 21.5 | 7  |
| 158. | P0AEK2 | 795   | 27.9 | 8  |
| 159. | P45523 | 792   | 28.9 | 6  |
| 160. | P0A877 | 782   | 15.3 | 8  |
| 161. | P0A955 | 765   | 27.7 | 2  |

**Documentation of Peptide and Protein Identifications**  
*eFASP-0.1%*n*OG (see Table 3A)*

|      |           |     |      |    |
|------|-----------|-----|------|----|
| 162. | P27306    | 732 | 17.0 | 11 |
| 163. | P23843    | 706 | 12.3 | 10 |
| 164. | P0A8L1    | 705 | 17.4 | 12 |
| 165. | P11989    | 702 | 31.3 | 7  |
| 166. | P15034    | 700 | 17.7 | 9  |
| 167. | P0A6K6    | 700 | 11.8 | 6  |
| 168. | P37902    | 700 | 29.8 | 6  |
| 169. | P0C0V0    | 699 | 6.8  | 7  |
| 170. | P17846    | 683 | 10.7 | 11 |
| 171. | P52643    | 681 | 19.2 | 6  |
| 172. | P77337    | 679 | 9.6  | 12 |
| 173. | P00962    | 678 | 8.1  | 15 |
| 174. | P0A6G7    | 642 | 21.7 | 4  |
| 175. | P25665    | 635 | 8.1  | 15 |
| 176. | P05055    | 635 | 12.0 | 18 |
| 177. | P0AFL3    | 632 | 31.1 | 5  |
| 178. | P77245    | 624 | 20.7 | 9  |
| 179. | P0AAI9    | 623 | 19.1 | 3  |
| 180. | P27848    | 603 | 29.7 | 8  |
| 181. | P0A7G6    | 602 | 9.9  | 10 |
| 182. | P0A9Q7    | 599 | 16.7 | 20 |
| 183. | P0A717    | 597 | 15.9 | 5  |
| 184. | P0ABA6    | 594 | 13.6 | 6  |
| 185. | P0A8N3    | 592 | 8.5  | 8  |
| 186. | P0A855    | 590 | 6.1  | 13 |
| 187. | P05791    | 577 | 10.7 | 11 |
| 188. | P76158    | 577 | 15.2 | 6  |
| 189. | P0A6R0    | 568 | 15.1 | 8  |
| 190. | P0AFF6    | 565 | 16.8 | 14 |
| 191. | P04805    | 563 | 8.5  | 6  |
| 192. | P0AEE1    | 536 | 16.8 | 2  |
| 193. | P0A705    | 524 | 14.4 | 20 |
| 194. | P30177    | 521 | 16.6 | 14 |
| 195. | P0AEW6    | 508 | 10.4 | 7  |
| 196. | P0AG76    | 504 | 16.3 | 7  |
| 197. | P76658    | 502 | 8.8  | 9  |
| 198. | P38051    | 501 | 2.1  | 6  |
| 199. | P37624    | 137 | 0.7  | 1  |
| 200. | P42632    | 59  | 1.4  | 1  |
| 201. | RANDOM468 | 15  | 0.0  | 1  |
| 202. | P0A8N5    | 42  | 2.2  | 3  |

## Documentation of Peptide and Protein Identifications

*eFASP-0.1%DCA (see Table 3A)*

### **eFASP-0.1%DCA** (see Table 3A)

|     | Accession | Score  | Coverage, % | Peptide matches |
|-----|-----------|--------|-------------|-----------------|
| 1.  | P0A6N1    | 86,992 | 73.9        | 25              |
| 2.  | P69776    | 71,659 | 65.4        | 6               |
| 3.  | P0ACF0    | 59,949 | 57.8        | 5               |
| 4.  | P0ADB7    | 55,093 | 39.6        | 1               |
| 5.  | P0A9B2    | 39,960 | 58.3        | 16              |
| 6.  | P0ACF8    | 39,930 | 59.9        | 9               |
| 7.  | P0A6P9    | 32,678 | 66.2        | 21              |
| 8.  | P0ABT2    | 30,569 | 63.5        | 13              |
| 9.  | P69783    | 30,318 | 62.7        | 9               |
| 10. | P0AG82    | 29,262 | 54.6        | 20              |
| 11. | P0A910    | 27,313 | 48.6        | 16              |
| 12. | P08200    | 23,808 | 53.1        | 19              |
| 13. | P0ABD3    | 23,225 | 58.2        | 9               |
| 14. | P0AEH5    | 21,184 | 45.5        | 4               |
| 15. | P0A862    | 19,651 | 58.3        | 6               |
| 16. | P0A799    | 18,456 | 64.3        | 19              |
| 17. | P06996    | 17,499 | 82.3        | 23              |
| 18. | P0A917    | 16,388 | 34.5        | 6               |
| 19. | P0C0L2    | 16,153 | 47.6        | 6               |
| 20. | P64581    | 15,712 | 31.7        | 2               |
| 21. | P0AA25    | 15,496 | 39.5        | 3               |
| 22. | P0A6Y8    | 13,711 | 59.7        | 34              |
| 23. | P0A6F5    | 13,594 | 75.2        | 31              |
| 24. | P0A6A8    | 12,831 | 33.3        | 3               |
| 25. | P0A8G6    | 12,249 | 40.4        | 6               |
| 26. | P0AET2    | 12,104 | 50.9        | 6               |
| 27. | P0AE08    | 11,199 | 44.9        | 7               |
| 28. | P0ABK5    | 11,181 | 67.8        | 14              |
| 29. | P00634    | 11,062 | 61.8        | 25              |
| 30. | P0AG86    | 10,667 | 31.6        | 3               |
| 31. | P60723    | 10,399 | 45.8        | 8               |
| 32. | P0A6M8    | 9,128  | 42.9        | 25              |
| 33. | P63284    | 9,119  | 56.0        | 39              |
| 34. | P0AFG6    | 8,655  | 31.1        | 10              |
| 35. | P69908    | 8,363  | 24.3        | 11              |
| 36. | P69910    | 8,282  | 22.1        | 8               |
| 37. | P0A905    | 8,265  | 38.7        | 6               |
| 38. | P21367    | 8,220  | 63.5        | 7               |

**Documentation of Peptide and Protein Identifications**  
*eFASP-0.1%DCA (see Table 3A)*

|     |        |       |      |    |
|-----|--------|-------|------|----|
| 39. | P0AD61 | 7,776 | 40.9 | 17 |
| 40. | P61889 | 7,543 | 70.8 | 17 |
| 41. | P0AEU7 | 7,509 | 44.7 | 8  |
| 42. | P0A7K2 | 7,493 | 45.5 | 9  |
| 43. | P00761 | 7,304 | 38.5 | 5  |
| 44. | P28635 | 7,260 | 66.8 | 15 |
| 45. | P09372 | 7,209 | 48.7 | 7  |
| 46. | P0A7V0 | 7,055 | 51.5 | 8  |
| 47. | P0AG55 | 6,904 | 44.1 | 7  |
| 48. | P0ABB4 | 6,286 | 45.4 | 17 |
| 49. | P0A7J7 | 6,254 | 57.8 | 5  |
| 50. | P0A7V3 | 6,146 | 29.6 | 7  |
| 51. | P0AF93 | 5,947 | 54.7 | 3  |
| 52. | P0AB71 | 5,915 | 34.5 | 9  |
| 53. | P00448 | 5,637 | 51.0 | 10 |
| 54. | P0A9D8 | 5,620 | 33.2 | 10 |
| 55. | P77717 | 5,582 | 76.8 | 5  |
| 56. | P00350 | 5,575 | 42.1 | 21 |
| 57. | P0AFG8 | 5,464 | 48.5 | 35 |
| 58. | P09373 | 5,438 | 52.2 | 33 |
| 59. | P0A870 | 5,302 | 42.0 | 13 |
| 60. | P62707 | 5,231 | 30.0 | 9  |
| 61. | P02359 | 5,025 | 58.1 | 12 |
| 62. | P0A9P0 | 4,784 | 44.1 | 16 |
| 63. | Q2M7R5 | 4,549 | 42.0 | 2  |
| 64. | P0A6X7 | 4,539 | 43.4 | 4  |
| 65. | P0A912 | 4,332 | 47.4 | 7  |
| 66. | P0A9Q9 | 4,307 | 32.4 | 8  |
| 67. | P0ACF4 | 4,245 | 24.4 | 2  |
| 68. | P00509 | 4,236 | 44.2 | 18 |
| 69. | P0ABB0 | 4,230 | 38.8 | 18 |
| 70. | P00489 | 3,814 | 48.3 | 38 |
| 71. | P0AGD3 | 3,760 | 30.6 | 5  |
| 72. | P0A8E7 | 3,755 | 42.3 | 6  |
| 73. | P0A7J3 | 3,735 | 41.2 | 6  |
| 74. | P0A7R1 | 3,563 | 38.9 | 6  |
| 75. | P08839 | 3,535 | 47.8 | 21 |
| 76. | P0A9C5 | 3,299 | 28.4 | 14 |
| 77. | P0A836 | 3,232 | 36.3 | 17 |
| 78. | P0A858 | 3,220 | 31.8 | 6  |
| 79. | P23721 | 3,162 | 35.9 | 14 |

**Documentation of Peptide and Protein Identifications**  
*eFASP-0.1%DCA (see Table 3A)*

|      |        |       |      |    |
|------|--------|-------|------|----|
| 80.  | P45470 | 3,128 | 14.5 | 3  |
| 81.  | P0A7L0 | 2,958 | 46.6 | 10 |
| 82.  | P0A991 | 2,954 | 55.1 | 15 |
| 83.  | P0AF70 | 2,895 | 48.7 | 3  |
| 84.  | P0AEQ3 | 2,858 | 37.9 | 9  |
| 85.  | P0A7X3 | 2,844 | 49.2 | 5  |
| 86.  | P0AG30 | 2,715 | 28.4 | 12 |
| 87.  | P0A7S9 | 2,653 | 34.8 | 6  |
| 88.  | P06959 | 2,618 | 30.8 | 15 |
| 89.  | P0AC59 | 2,578 | 55.8 | 11 |
| 90.  | P0ADE6 | 2,564 | 69.1 | 9  |
| 91.  | P0AEK2 | 2,557 | 21.3 | 4  |
| 92.  | P0A717 | 2,528 | 20.6 | 6  |
| 93.  | P69441 | 2,515 | 20.6 | 5  |
| 94.  | P56614 | 2,501 | 17.5 | 1  |
| 95.  | P0A825 | 2,501 | 32.4 | 11 |
| 96.  | P0A715 | 2,456 | 39.4 | 9  |
| 97.  | P0A867 | 2,420 | 46.8 | 15 |
| 98.  | P02358 | 2,419 | 34.8 | 4  |
| 99.  | P37051 | 2,360 | 44.3 | 8  |
| 100. | P0A850 | 2,343 | 32.2 | 15 |
| 101. | P23538 | 2,330 | 15.3 | 18 |
| 102. | P0A7D7 | 2,300 | 32.9 | 8  |
| 103. | P0A7W1 | 2,263 | 37.7 | 4  |
| 104. | P02932 | 2,232 | 40.7 | 16 |
| 105. | P0AG44 | 2,190 | 46.5 | 8  |
| 106. | P0A6P1 | 2,174 | 39.6 | 15 |
| 107. | P0ABD8 | 2,169 | 47.4 | 7  |
| 108. | P0AAN9 | 2,158 | 31.4 | 2  |
| 109. | P0ABH7 | 2,098 | 26.7 | 9  |
| 110. | P0A7V8 | 2,084 | 34.0 | 10 |
| 111. | P0AFH8 | 2,080 | 23.4 | 9  |
| 112. | P0A8X0 | 2,048 | 16.9 | 2  |
| 113. | P0A8V2 | 2,027 | 36.2 | 43 |
| 114. | P0A7Z4 | 2,027 | 37.7 | 13 |
| 115. | P0A6F9 | 2,008 | 38.1 | 4  |
| 116. | P0AGE9 | 1,996 | 33.2 | 8  |
| 117. | P0AB80 | 1,989 | 20.7 | 8  |
| 118. | P0AE12 | 1,935 | 26.2 | 14 |
| 119. | P0A6T9 | 1,921 | 17.8 | 2  |
| 120. | P0A8T7 | 1,913 | 34.8 | 50 |

**Documentation of Peptide and Protein Identifications**  
*eFASP-0.1%DCA (see Table 3A)*

|      |        |       |      |    |
|------|--------|-------|------|----|
| 121. | P0A953 | 1,913 | 40.6 | 11 |
| 122. | P0A707 | 1,850 | 25.6 | 6  |
| 123. | P13979 | 1,810 | 21.7 | 7  |
| 124. | P0A7R9 | 1,739 | 21.7 | 2  |
| 125. | P05791 | 1,663 | 39.6 | 20 |
| 126. | P39177 | 1,642 | 60.6 | 6  |
| 127. | P28304 | 1,622 | 15.3 | 6  |
| 128. | P0AG80 | 1,620 | 39.0 | 18 |
| 129. | P0AG67 | 1,608 | 13.1 | 14 |
| 130. | P25665 | 1,502 | 15.0 | 19 |
| 131. | P21420 | 1,500 | 21.6 | 9  |
| 132. | P0ACA3 | 1,497 | 22.2 | 9  |
| 133. | P45523 | 1,485 | 13.0 | 6  |
| 134. | P0ADB1 | 1,472 | 27.7 | 3  |
| 135. | P0A908 | 1,447 | 5.2  | 2  |
| 136. | P0C0V0 | 1,417 | 19.2 | 10 |
| 137. | P0AAC0 | 1,405 | 13.0 | 5  |
| 138. | P0AEK4 | 1,376 | 23.7 | 10 |
| 139. | P0AG18 | 1,349 | 28.4 | 3  |
| 140. | P0A9A6 | 1,330 | 19.6 | 10 |
| 141. | P65556 | 1,306 | 28.9 | 4  |
| 142. | P0ABJ9 | 1,292 | 16.3 | 8  |
| 143. | P0AAI3 | 1,271 | 12.9 | 12 |
| 144. | P31663 | 1,202 | 13.4 | 4  |
| 145. | P15288 | 1,197 | 14.2 | 8  |
| 146. | P0AGE6 | 1,193 | 37.2 | 4  |
| 147. | P0AGE0 | 1,184 | 31.5 | 7  |
| 148. | P0A9Y6 | 1,183 | 78.3 | 6  |
| 149. | P0ACJ8 | 1,168 | 26.2 | 10 |
| 150. | P0AEZ3 | 1,164 | 21.5 | 6  |
| 151. | P0A6Y1 | 1,142 | 11.7 | 4  |
| 152. | P63235 | 1,125 | 5.1  | 5  |
| 153. | P0A9Q7 | 1,106 | 30.5 | 32 |
| 154. | P0AFG3 | 1,089 | 25.0 | 27 |
| 155. | P0AE52 | 1,081 | 30.8 | 4  |
| 156. | P21362 | 1,046 | 32.5 | 3  |
| 157. | P0A9M8 | 1,044 | 18.6 | 20 |
| 158. | P0A8M0 | 1,041 | 21.7 | 13 |
| 159. | P23843 | 1,015 | 32.8 | 17 |
| 160. | P76121 | 1,008 | 28.0 | 3  |
| 161. | P0ABA6 | 991   | 22.7 | 11 |

**Documentation of Peptide and Protein Identifications**  
*eFASP-0.1%DCA (see Table 3A)*

|      |        |     |      |    |
|------|--------|-----|------|----|
| 162. | P25516 | 978 | 16.2 | 24 |
| 163. | P0ACX3 | 977 | 26.7 | 3  |
| 164. | P25553 | 955 | 19.2 | 11 |
| 165. | P0AAI9 | 922 | 12.0 | 9  |
| 166. | P0AD96 | 913 | 40.6 | 15 |
| 167. | P0AEE5 | 895 | 5.7  | 13 |
| 168. | P77747 | 882 | 16.5 | 7  |
| 169. | P0ABU2 | 877 | 16.8 | 11 |
| 170. | P61714 | 877 | 27.6 | 5  |
| 171. | P0A7D1 | 860 | 6.7  | 3  |
| 172. | P76014 | 855 | 26.2 | 8  |
| 173. | P00961 | 855 | 15.1 | 20 |
| 174. | P0A6K6 | 852 | 13.3 | 11 |
| 175. | P0AET8 | 851 | 15.3 | 6  |
| 176. | P60757 | 840 | 26.4 | 10 |
| 177. | P06986 | 833 | 11.0 | 7  |
| 178. | P15639 | 805 | 22.7 | 14 |
| 179. | P0C0S1 | 797 | 14.0 | 4  |
| 180. | P60438 | 796 | 18.2 | 5  |
| 181. | P0A6B7 | 786 | 17.6 | 8  |
| 182. | P32144 | 785 | 15.7 | 5  |
| 183. | P00962 | 766 | 14.6 | 13 |
| 184. | P39199 | 766 | 5.8  | 2  |
| 185. | P0AE06 | 763 | 14.6 | 11 |
| 186. | Q47141 | 755 | 21.0 | 7  |
| 187. | P06999 | 748 | 10.7 | 6  |
| 188. | P0ADE8 | 745 | 12.3 | 11 |
| 189. | P00934 | 737 | 11.5 | 11 |
| 190. | P05793 | 735 | 19.8 | 17 |
| 191. | P0A903 | 731 | 8.7  | 4  |
| 192. | P0A8F0 | 690 | 8.2  | 4  |
| 193. | P0A7Z0 | 689 | 19.2 | 4  |
| 194. | P17446 | 688 | 16.4 | 6  |
| 195. | P16682 | 685 | 11.8 | 11 |
| 196. | P07017 | 682 | 16.1 | 8  |
| 197. | P22255 | 671 | 26.8 | 5  |
| 198. | P76335 | 660 | 11.6 | 7  |
| 199. | P09551 | 660 | 6.5  | 9  |
| 200. | P33599 | 650 | 10.7 | 12 |
| 201. | P77804 | 645 | 14.3 | 16 |
| 202. | P09996 | 643 | 21.2 | 3  |

**Documentation of Peptide and Protein Identifications**  
*eFASP-0.1%DCA (see Table 3A)*

|      |        |     |      |    |
|------|--------|-----|------|----|
| 203. | P02930 | 628 | 9.9  | 10 |
| 204. | P0A805 | 625 | 18.9 | 4  |
| 205. | P0A9T0 | 623 | 9.3  | 12 |
| 206. | P77395 | 622 | 10.6 | 4  |
| 207. | P0A705 | 621 | 13.0 | 18 |
| 208. | P15877 | 619 | 8.4  | 7  |
| 209. | P75797 | 617 | 21.1 | 14 |
| 210. | P30011 | 614 | 21.2 | 4  |
| 211. | P05055 | 604 | 17.0 | 18 |
| 212. | P0A7D4 | 597 | 19.7 | 11 |
| 213. | P0ABP8 | 596 | 13.4 | 9  |
| 214. | P77714 | 596 | 12.4 | 2  |
| 215. | P02931 | 588 | 18.8 | 9  |
| 216. | P77269 | 582 | 29.7 | 12 |
| 217. | P0AEM9 | 581 | 35.7 | 11 |
| 218. | P0A6Z3 | 573 | 15.5 | 16 |
| 219. | P0AFF6 | 563 | 12.7 | 7  |
| 220. | P27298 | 555 | 10.7 | 13 |
| 221. | P0A9Q1 | 550 | 13.9 | 4  |
| 222. | P36683 | 549 | 9.8  | 19 |
| 223. | P24182 | 547 | 14.3 | 10 |
| 224. | P0A877 | 544 | 15.3 | 8  |
| 225. | P25714 | 534 | 15.2 | 6  |
| 226. | P00968 | 527 | 14.4 | 27 |
| 227. | P04335 | 524 | 12.8 | 10 |
| 228. | P0AEZ9 | 513 | 28.2 | 5  |
| 229. | P0A8L1 | 504 | 21.4 | 9  |
| 230. | P0AC41 | 502 | 10.7 | 11 |
| 231. | P00959 | 492 | 11.2 | 18 |
| 232. | P0ACU7 | 490 | 23.0 | 10 |
| 233. | P33602 | 489 | 13.9 | 18 |
| 234. | P0AE88 | 489 | 12.5 | 4  |
| 235. | P0A855 | 488 | 18.4 | 11 |
| 236. | P17888 | 487 | 14.9 | 11 |
| 237. | P0ACB4 | 483 | 20.4 | 5  |
| 238. | P0AF24 | 482 | 10.0 | 3  |
| 239. | P0ADG7 | 481 | 12.1 | 12 |
| 240. | P58036 | 478 | 29.9 | 3  |
| 241. | P52074 | 476 | 16.5 | 9  |
| 242. | P21599 | 464 | 20.0 | 12 |
| 243. | P0ADV7 | 463 | 15.2 | 5  |



**Documentation of Peptide and Protein Identifications**  
*eFASP-0.1%DCA (see Table 3A)*

|      |        |     |      |    |
|------|--------|-----|------|----|
| 244. | P14375 | 463 | 15.7 | 6  |
| 245. | P42632 | 446 | 13.4 | 21 |
| 246. | P23847 | 440 | 7.5  | 14 |
| 247. | P21165 | 440 | 7.5  | 9  |
| 248. | P02413 | 437 | 17.4 | 6  |
| 249. | P07118 | 430 | 8.7  | 20 |
| 250. | P0ACY3 | 426 | 11.8 | 15 |
| 251. | P0ADS6 | 424 | 4.1  | 7  |
| 252. | P96329 | 424 | 10.4 | 15 |
| 253. | P37624 | 205 | 0.7  | 1  |

## Documentation of Peptide and Protein Identifications

*eFASP-0.2%DCA (see Table 3A)*

### **eFASP-0.2%DCA** (see Table 3A)

|     | Accession | Score   | Coverage, % | Peptide matches |
|-----|-----------|---------|-------------|-----------------|
| 1.  | P0A6N1    | 103,234 | 66.5        | 22              |
| 2.  | P69776    | 71,204  | 62.8        | 4               |
| 3.  | P0ACF0    | 48,721  | 57.8        | 4               |
| 4.  | P0ABT2    | 47,424  | 64.1        | 11              |
| 5.  | P0ACF8    | 43,561  | 59.9        | 7               |
| 6.  | P0A9B2    | 43,240  | 63.1        | 20              |
| 7.  | P0A910    | 37,807  | 59.5        | 18              |
| 8.  | P0A6P9    | 35,868  | 71.3        | 21              |
| 9.  | P0ABD3    | 34,707  | 46.8        | 6               |
| 10. | P69783    | 33,750  | 62.7        | 9               |
| 11. | P0ADB7    | 32,697  | 45.8        | 2               |
| 12. | P0AG82    | 29,592  | 66.8        | 24              |
| 13. | P0AET2    | 27,918  | 63.0        | 6               |
| 14. | P0AA25    | 23,833  | 64.2        | 5               |
| 15. | P64581    | 22,977  | 33.7        | 3               |
| 16. | P0C0L2    | 21,955  | 35.7        | 4               |
| 17. | P06996    | 21,785  | 64.3        | 19              |
| 18. | P08200    | 20,185  | 54.1        | 20              |
| 19. | P0A862    | 18,680  | 58.3        | 6               |
| 20. | P0AEH5    | 17,686  | 28.7        | 3               |
| 21. | P0A6Y8    | 17,126  | 68.8        | 37              |
| 22. | P0A799    | 16,874  | 69.0        | 23              |
| 23. | P0A917    | 16,744  | 62.6        | 9               |
| 24. | P0A6F5    | 15,749  | 66.6        | 28              |
| 25. | P00634    | 14,879  | 81.5        | 28              |
| 26. | P0AE08    | 14,656  | 49.7        | 7               |
| 27. | P69908    | 14,493  | 42.3        | 19              |
| 28. | P69910    | 14,429  | 40.1        | 17              |
| 29. | P0A8G6    | 14,339  | 43.9        | 6               |
| 30. | P0AEU7    | 11,458  | 64.6        | 11              |
| 31. | P63284    | 11,279  | 56.1        | 41              |
| 32. | P0ABK5    | 11,143  | 52.0        | 14              |
| 33. | P21367    | 11,037  | 42.8        | 6               |
| 34. | P0A6M8    | 10,931  | 52.7        | 30              |
| 35. | P0AG86    | 10,614  | 29.7        | 3               |
| 36. | P02358    | 10,361  | 33.3        | 3               |
| 37. | P0A912    | 10,143  | 45.1        | 7               |
| 38. | P28635    | 9,118   | 80.8        | 18              |

**Documentation of Peptide and Protein Identifications**  
*eFASP-0.2%DCA (see Table 3A)*

|     |        |       |      |    |
|-----|--------|-------|------|----|
| 39. | P62707 | 9,103 | 41.6 | 11 |
| 40. | P0A9P0 | 8,829 | 47.9 | 17 |
| 41. | P0A7J3 | 8,512 | 57.0 | 8  |
| 42. | P0AB71 | 8,504 | 38.2 | 10 |
| 43. | P77717 | 7,844 | 64.2 | 5  |
| 44. | P09372 | 7,473 | 51.3 | 8  |
| 45. | P61889 | 7,425 | 54.2 | 12 |
| 46. | P0ABB4 | 7,025 | 66.7 | 23 |
| 47. | P0AD61 | 6,822 | 50.2 | 19 |
| 48. | P0AEK4 | 6,631 | 53.1 | 13 |
| 49. | P00761 | 6,560 | 52.8 | 7  |
| 50. | P0A905 | 6,337 | 42.6 | 5  |
| 51. | P09373 | 6,285 | 60.1 | 38 |
| 52. | P02932 | 6,229 | 57.6 | 19 |
| 53. | P0AGD3 | 6,220 | 43.5 | 9  |
| 54. | P0A7K2 | 6,065 | 61.2 | 9  |
| 55. | P0AFG8 | 6,008 | 43.1 | 31 |
| 56. | P00350 | 5,703 | 44.9 | 20 |
| 57. | P0A7V3 | 5,684 | 28.8 | 7  |
| 58. | P0A7V0 | 5,653 | 52.7 | 9  |
| 59. | P0A836 | 5,496 | 42.8 | 10 |
| 60. | P0A6P1 | 5,269 | 71.4 | 18 |
| 61. | P0A7R5 | 5,254 | 49.5 | 5  |
| 62. | P08839 | 5,199 | 40.2 | 20 |
| 63. | P0A6A8 | 5,160 | 12.8 | 3  |
| 64. | P0AGE6 | 5,050 | 50.5 | 4  |
| 65. | P0A858 | 4,930 | 67.8 | 14 |
| 66. | P00448 | 4,926 | 28.6 | 5  |
| 67. | P0A870 | 4,773 | 53.9 | 15 |
| 68. | P0AFG6 | 4,685 | 28.2 | 10 |
| 69. | P00489 | 4,569 | 51.6 | 44 |
| 70. | P0A9D8 | 4,539 | 29.6 | 8  |
| 71. | P0A715 | 4,510 | 33.1 | 7  |
| 72. | P60438 | 4,492 | 29.2 | 8  |
| 73. | P02359 | 4,451 | 26.8 | 5  |
| 74. | P0AG55 | 4,363 | 27.7 | 4  |
| 75. | P0A7J7 | 4,345 | 62.0 | 6  |
| 76. | P0A850 | 4,194 | 40.7 | 18 |
| 77. | P0ABB0 | 4,182 | 36.5 | 16 |
| 78. | P0A6X7 | 4,181 | 19.2 | 2  |
| 79. | P0ACF4 | 4,178 | 24.4 | 2  |

**Documentation of Peptide and Protein Identifications**  
*eFASP-0.2%DCA (see Table 3A)*

|      |        |       |      |    |
|------|--------|-------|------|----|
| 80.  | P0C0S1 | 4,171 | 34.3 | 8  |
| 81.  | P0A6F9 | 4,158 | 68.0 | 6  |
| 82.  | P60723 | 4,039 | 39.8 | 9  |
| 83.  | P0A8E7 | 4,033 | 57.7 | 9  |
| 84.  | P0AG30 | 3,956 | 20.1 | 8  |
| 85.  | P23721 | 3,916 | 54.7 | 20 |
| 86.  | P0A7R1 | 3,906 | 40.9 | 7  |
| 87.  | P0A717 | 3,904 | 37.1 | 10 |
| 88.  | P0A9C5 | 3,714 | 37.1 | 11 |
| 89.  | P06959 | 3,714 | 37.9 | 21 |
| 90.  | P0A9Q9 | 3,480 | 24.8 | 7  |
| 91.  | P0ADB1 | 3,463 | 48.2 | 4  |
| 92.  | P0A7V8 | 3,423 | 43.2 | 10 |
| 93.  | P0A7U7 | 3,098 | 34.5 | 5  |
| 94.  | P0AEQ3 | 3,083 | 31.5 | 7  |
| 95.  | P00509 | 3,080 | 61.6 | 21 |
| 96.  | P0A7D4 | 3,045 | 38.9 | 11 |
| 97.  | P0AF36 | 2,954 | 69.1 | 5  |
| 98.  | P0A7Z4 | 2,906 | 30.1 | 10 |
| 99.  | P0ABP8 | 2,887 | 13.4 | 7  |
| 100. | P0A7D7 | 2,847 | 34.2 | 11 |
| 101. | P0AG80 | 2,796 | 43.2 | 18 |
| 102. | P69441 | 2,754 | 40.7 | 9  |
| 103. | P0A7W1 | 2,750 | 42.5 | 7  |
| 104. | P0AEK2 | 2,668 | 29.1 | 5  |
| 105. | P68699 | 2,593 | 20.3 | 2  |
| 106. | P0A8T7 | 2,582 | 28.1 | 41 |
| 107. | P0AB80 | 2,538 | 20.7 | 10 |
| 108. | P37051 | 2,518 | 36.8 | 8  |
| 109. | P15288 | 2,508 | 34.9 | 14 |
| 110. | P0ADW3 | 2,501 | 55.3 | 6  |
| 111. | P0AG48 | 2,434 | 21.4 | 2  |
| 112. | P0AFH8 | 2,423 | 50.3 | 7  |
| 113. | P0ACA3 | 2,316 | 38.7 | 10 |
| 114. | P0A825 | 2,314 | 29.7 | 15 |
| 115. | P0AG44 | 2,308 | 37.8 | 6  |
| 116. | P0A7T7 | 2,303 | 40.0 | 5  |
| 117. | P0AFX0 | 2,299 | 67.4 | 3  |
| 118. | P0AAN9 | 2,287 | 62.8 | 2  |
| 119. | P0AC59 | 2,267 | 38.6 | 8  |
| 120. | P0ADE6 | 2,252 | 57.1 | 9  |

**Documentation of Peptide and Protein Identifications**  
*eFASP-0.2%DCA (see Table 3A)*

|      |        |       |      |    |
|------|--------|-------|------|----|
| 121. | P31658 | 2,232 | 17.3 | 8  |
| 122. | P0ABH7 | 2,208 | 20.6 | 10 |
| 123. | P0AFJ5 | 2,149 | 14.9 | 2  |
| 124. | P28304 | 2,118 | 18.7 | 6  |
| 125. | P0AG67 | 2,101 | 20.5 | 20 |
| 126. | P0AE12 | 2,009 | 22.1 | 8  |
| 127. | P0ACJ8 | 1,942 | 28.1 | 5  |
| 128. | P0A7L0 | 1,940 | 33.3 | 7  |
| 129. | P0A6T9 | 1,912 | 31.0 | 3  |
| 130. | P0A8V2 | 1,881 | 31.2 | 50 |
| 131. | P0AB14 | 1,862 | 25.3 | 1  |
| 132. | P39177 | 1,818 | 38.0 | 6  |
| 133. | P36659 | 1,801 | 30.1 | 9  |
| 134. | P0A991 | 1,799 | 26.0 | 10 |
| 135. | P31663 | 1,672 | 17.7 | 6  |
| 136. | P05791 | 1,658 | 20.3 | 12 |
| 137. | P0A8M0 | 1,639 | 15.0 | 7  |
| 138. | P0ABA0 | 1,624 | 28.2 | 8  |
| 139. | P21420 | 1,582 | 39.2 | 11 |
| 140. | P23538 | 1,553 | 15.2 | 19 |
| 141. | P13979 | 1,542 | 30.3 | 6  |
| 142. | P0A8W8 | 1,499 | 17.7 | 8  |
| 143. | P0C0V0 | 1,481 | 31.4 | 14 |
| 144. | P76014 | 1,473 | 34.8 | 8  |
| 145. | P0A9A6 | 1,437 | 22.2 | 13 |
| 146. | P0A8L1 | 1,432 | 26.7 | 12 |
| 147. | P0A6K3 | 1,423 | 29.6 | 6  |
| 148. | P0AEZ3 | 1,382 | 19.6 | 6  |
| 149. | P0AAX8 | 1,299 | 30.7 | 10 |
| 150. | P0A908 | 1,281 | 11.3 | 3  |
| 151. | P0A9Q7 | 1,271 | 27.5 | 27 |
| 152. | P0A7L3 | 1,262 | 22.9 | 5  |
| 153. | P0ADV7 | 1,251 | 28.4 | 8  |
| 154. | P75691 | 1,243 | 21.8 | 7  |
| 155. | P0A867 | 1,233 | 27.9 | 8  |
| 156. | P77747 | 1,198 | 25.2 | 15 |
| 157. | P24182 | 1,161 | 20.7 | 14 |
| 158. | P33602 | 1,155 | 21.3 | 18 |
| 159. | P0AEM9 | 1,105 | 23.7 | 12 |
| 160. | P37194 | 1,097 | 20.2 | 2  |
| 161. | P0AAI3 | 1,094 | 14.4 | 17 |

**Documentation of Peptide and Protein Identifications**  
*eFASP-0.2%DCA (see Table 3A)*

|      |        |       |      |    |
|------|--------|-------|------|----|
| 162. | P0A7R9 | 1,088 | 20.9 | 4  |
| 163. | P0A6H1 | 1,086 | 23.1 | 13 |
| 164. | P25516 | 1,077 | 19.3 | 25 |
| 165. | P08506 | 1,070 | 16.0 | 14 |
| 166. | P0A9M8 | 1,065 | 29.6 | 20 |
| 167. | P0ABD5 | 1,063 | 26.7 | 8  |
| 168. | Q46857 | 1,047 | 19.6 | 8  |
| 169. | P0ACX3 | 1,045 | 14.9 | 3  |
| 170. | P0A7T3 | 1,041 | 19.5 | 2  |
| 171. | P0A6Z3 | 1,022 | 21.2 | 13 |
| 172. | P0A7W7 | 990   | 35.4 | 7  |
| 173. | P0AET8 | 979   | 12.9 | 6  |
| 174. | P63235 | 963   | 6.7  | 3  |
| 175. | P0ADE8 | 956   | 24.2 | 8  |
| 176. | P0A7D1 | 903   | 22.2 | 7  |
| 177. | P0A953 | 900   | 15.0 | 7  |
| 178. | P23843 | 865   | 11.4 | 10 |
| 179. | P37685 | 858   | 18.8 | 11 |
| 180. | P21599 | 857   | 15.4 | 13 |
| 181. | P0AF70 | 857   | 30.8 | 3  |
| 182. | P76177 | 845   | 21.3 | 10 |
| 183. | P04693 | 842   | 5.8  | 4  |
| 184. | P10907 | 841   | 11.2 | 7  |
| 185. | P0AFG3 | 835   | 16.8 | 20 |
| 186. | P0ABJ9 | 806   | 13.0 | 7  |
| 187. | P00961 | 802   | 17.7 | 22 |
| 188. | P0A9K7 | 793   | 23.2 | 5  |
| 189. | P60595 | 780   | 28.1 | 3  |
| 190. | Q46906 | 778   | 7.9  | 3  |
| 191. | P05793 | 764   | 25.7 | 19 |
| 192. | P25665 | 756   | 8.1  | 10 |
| 193. | P0A705 | 742   | 15.2 | 20 |
| 194. | P75893 | 715   | 27.4 | 5  |
| 195. | P0AFF6 | 708   | 11.9 | 10 |
| 196. | P16659 | 701   | 9.1  | 12 |
| 197. | P0AAC0 | 688   | 15.5 | 5  |
| 198. | P05055 | 688   | 15.1 | 16 |
| 199. | P06999 | 685   | 28.8 | 11 |
| 200. | P0AE06 | 682   | 22.2 | 9  |
| 201. | P76335 | 678   | 7.1  | 6  |
| 202. | P00957 | 677   | 22.7 | 30 |

**Documentation of Peptide and Protein Identifications**  
*eFASP-0.2%DCA (see Table 3A)*

|      |        |     |      |    |
|------|--------|-----|------|----|
| 203. | P77581 | 659 | 15.0 | 8  |
| 204. | P0A8V6 | 653 | 15.5 | 3  |
| 205. | P0A8F0 | 648 | 18.3 | 4  |
| 206. | P0AAH0 | 644 | 25.7 | 11 |
| 207. | P77804 | 639 | 18.1 | 17 |
| 208. | P02930 | 639 | 17.2 | 13 |
| 209. | P06986 | 624 | 10.4 | 5  |
| 210. | P27298 | 611 | 12.5 | 18 |
| 211. | P0AEP7 | 589 | 10.6 | 10 |
| 212. | P00962 | 588 | 12.5 | 18 |
| 213. | P39199 | 583 | 5.8  | 5  |
| 214. | P0A7I4 | 580 | 14.0 | 14 |
| 215. | P06987 | 579 | 15.8 | 13 |
| 216. | P0A7E5 | 576 | 4.2  | 10 |
| 217. | P37349 | 575 | 19.5 | 9  |
| 218. | P52132 | 573 | 21.6 | 8  |
| 219. | P04816 | 556 | 17.1 | 10 |
| 220. | P15639 | 555 | 21.6 | 13 |
| 221. | P39325 | 555 | 23.9 | 11 |
| 222. | P32056 | 553 | 28.3 | 7  |
| 223. | P09424 | 551 | 13.4 | 10 |
| 224. | P0A6T1 | 549 | 10.2 | 13 |
| 225. | P0A796 | 549 | 21.6 | 5  |
| 226. | P0A6R0 | 544 | 6.6  | 6  |
| 227. | P00960 | 530 | 14.9 | 4  |
| 228. | P60624 | 522 | 21.2 | 4  |
| 229. | P0AFP6 | 521 | 6.9  | 4  |
| 230. | P39379 | 518 | 17.6 | 2  |
| 231. | P0A903 | 511 | 12.8 | 7  |
| 232. | P0AE37 | 506 | 18.3 | 6  |
| 233. | P0A6K6 | 504 | 6.6  | 7  |
| 234. | P15877 | 500 | 10.9 | 14 |
| 235. | P0AA10 | 495 | 28.9 | 5  |
| 236. | P37689 | 491 | 10.3 | 12 |
| 237. | P25690 | 487 | 11.6 | 13 |
| 238. | P75830 | 486 | 14.8 | 9  |
| 239. | P45523 | 483 | 15.2 | 12 |
| 240. | P45463 | 479 | 11.9 | 9  |
| 241. | P0A6F3 | 478 | 12.6 | 9  |
| 242. | P0ADS9 | 478 | 29.7 | 9  |
| 243. | P0AF24 | 474 | 22.0 | 7  |

**Documentation of Peptide and Protein Identifications**  
*eFASP-0.2%DCA (see Table 3A)*

|      |        |     |      |    |
|------|--------|-----|------|----|
| 244. | P0A8I3 | 471 | 15.9 | 5  |
| 245. | P67910 | 471 | 23.2 | 9  |
| 246. | P04805 | 467 | 16.6 | 12 |
| 247. | P0AES6 | 467 | 8.3  | 20 |
| 248. | P77774 | 464 | 15.3 | 8  |
| 249. | P27306 | 461 | 18.5 | 10 |
| 250. | P0AFK9 | 458 | 4.9  | 8  |
| 251. | P69786 | 458 | 6.1  | 6  |
| 252. | P77439 | 16  | 0.0  | 1  |
| 253. | Q14525 | 89  | 4.7  | 3  |
| 254. | O76009 | 89  | 4.7  | 3  |
| 255. | O76011 | 73  | 1.8  | 2  |
| 256. | P02534 | 81  | 1.9  | 5  |



**Documentation of Peptide and Protein Identifications**  
*eFASP-0.1%DCA-0.1%nOG (see Table 3A)*

**eFASP-0.1%DCA-0.1%nOG** (see Table 3A)

|     | Accession | Score  | Coverage, % | Peptide matches |
|-----|-----------|--------|-------------|-----------------|
| 1.  | P69776    | 88,890 | 48.7        | 4               |
| 2.  | P0A6N1    | 88,441 | 67.8        | 20              |
| 3.  | P0ACF8    | 52,823 | 71.5        | 12              |
| 4.  | P0ADB7    | 50,238 | 85.4        | 2               |
| 5.  | P0ABT2    | 50,227 | 71.3        | 14              |
| 6.  | P0ACF0    | 40,748 | 57.8        | 5               |
| 7.  | P0A9B2    | 38,652 | 68.0        | 20              |
| 8.  | P0AG82    | 37,202 | 69.9        | 24              |
| 9.  | P69783    | 36,330 | 66.3        | 10              |
| 10. | P0A6P9    | 28,176 | 63.9        | 22              |
| 11. | P06996    | 26,493 | 74.1        | 24              |
| 12. | P0ABD3    | 24,860 | 58.2        | 7               |
| 13. | P0A862    | 23,040 | 48.8        | 6               |
| 14. | P64581    | 22,369 | 25.7        | 2               |
| 15. | P08200    | 22,137 | 56.0        | 22              |
| 16. | P0C0L2    | 21,361 | 51.8        | 6               |
| 17. | P0A7M6    | 19,128 | 58.7        | 4               |
| 18. | P0A799    | 16,567 | 78.0        | 22              |
| 19. | P0A910    | 16,205 | 61.9        | 19              |
| 20. | P0AG86    | 15,941 | 34.2        | 4               |
| 21. | P0AEH5    | 15,920 | 61.4        | 4               |
| 22. | P0A6F5    | 15,643 | 56.4        | 24              |
| 23. | P00761    | 14,550 | 31.6        | 5               |
| 24. | P0A6Y8    | 12,903 | 58.2        | 31              |
| 25. | P0A917    | 12,027 | 39.2        | 7               |
| 26. | P0AA25    | 11,418 | 36.7        | 3               |
| 27. | P00634    | 10,993 | 64.5        | 20              |
| 28. | P0AEU7    | 10,536 | 56.5        | 10              |
| 29. | P28635    | 10,441 | 78.2        | 14              |
| 30. | P63284    | 10,189 | 53.8        | 40              |
| 31. | P62707    | 10,101 | 50.4        | 10              |
| 32. | P0A8G6    | 9,827  | 37.4        | 7               |
| 33. | P0AGD3    | 9,279  | 44.6        | 7               |
| 34. | P0ABK5    | 9,271  | 52.3        | 13              |
| 35. | P69908    | 8,558  | 39.7        | 17              |
| 36. | P0AET2    | 8,457  | 37.0        | 3               |
| 37. | P69910    | 8,356  | 40.6        | 19              |

**Documentation of Peptide and Protein Identifications**  
*eFASP-0.1%DCA-0.1%nOG (see Table 3A)*

|     |        |       |      |    |
|-----|--------|-------|------|----|
| 38. | P0A6M8 | 8,119 | 60.1 | 32 |
| 39. | P0AE08 | 8,063 | 72.7 | 10 |
| 40. | P0A7K2 | 7,789 | 61.2 | 5  |
| 41. | P21367 | 7,318 | 53.9 | 7  |
| 42. | P0A6F9 | 7,313 | 41.2 | 3  |
| 43. | P0AD61 | 7,268 | 47.2 | 16 |
| 44. | P61889 | 7,123 | 58.7 | 13 |
| 45. | P0ACF4 | 7,044 | 21.1 | 2  |
| 46. | P0AFG6 | 6,965 | 46.4 | 16 |
| 47. | P09373 | 6,763 | 47.8 | 32 |
| 48. | P0A9P0 | 6,627 | 29.1 | 14 |
| 49. | P0AFG8 | 6,558 | 48.6 | 33 |
| 50. | P0A7J7 | 6,434 | 58.5 | 5  |
| 51. | P02932 | 6,391 | 51.9 | 15 |
| 52. | P0A7V3 | 6,194 | 26.6 | 7  |
| 53. | P68699 | 6,142 | 20.3 | 2  |
| 54. | P0AC59 | 6,132 | 52.6 | 8  |
| 55. | P0AB71 | 6,051 | 35.9 | 9  |
| 56. | P0A912 | 6,030 | 50.3 | 8  |
| 57. | P0A858 | 5,927 | 60.4 | 11 |
| 58. | P0ABB4 | 5,725 | 39.4 | 13 |
| 59. | P0AAN9 | 5,603 | 37.2 | 2  |
| 60. | P0A7V0 | 5,568 | 47.7 | 9  |
| 61. | P0A7R5 | 5,422 | 34.0 | 4  |
| 62. | P00350 | 5,274 | 52.6 | 18 |
| 63. | P0ABB0 | 5,250 | 59.8 | 26 |
| 64. | P00448 | 5,214 | 44.2 | 7  |
| 65. | P0A870 | 5,137 | 49.2 | 13 |
| 66. | P0A6X7 | 5,099 | 25.3 | 2  |
| 67. | P0A8E7 | 4,882 | 54.6 | 9  |
| 68. | P0A7V8 | 4,869 | 37.9 | 11 |
| 69. | P0ADE6 | 4,787 | 51.0 | 8  |
| 70. | P0AEK4 | 4,645 | 38.6 | 8  |
| 71. | P00489 | 4,609 | 44.1 | 39 |
| 72. | P0A9D8 | 4,541 | 41.6 | 8  |
| 73. | P0AFH8 | 4,413 | 37.8 | 6  |
| 74. | P0A7S9 | 4,340 | 54.2 | 5  |
| 75. | P0ACJ8 | 4,338 | 33.3 | 7  |
| 76. | P0AG44 | 4,303 | 44.9 | 6  |
| 77. | P77717 | 4,104 | 78.4 | 5  |
| 78. | P0A7Z4 | 3,952 | 39.5 | 13 |

**Documentation of Peptide and Protein Identifications**  
*eFASP-0.1%DCA-0.1%nOG (see Table 3A)*

|      |        |       |      |    |
|------|--------|-------|------|----|
| 79.  | P0AG55 | 3,887 | 41.8 | 5  |
| 80.  | P02358 | 3,861 | 16.3 | 3  |
| 81.  | P0A9Q9 | 3,842 | 24.3 | 8  |
| 82.  | P60723 | 3,821 | 32.3 | 5  |
| 83.  | P21420 | 3,786 | 33.7 | 14 |
| 84.  | P02359 | 3,759 | 45.8 | 8  |
| 85.  | P0AG30 | 3,724 | 38.9 | 14 |
| 86.  | P08839 | 3,641 | 47.0 | 17 |
| 87.  | P0A836 | 3,455 | 50.8 | 16 |
| 88.  | P0AG80 | 3,354 | 27.9 | 11 |
| 89.  | Q2M7R5 | 3,290 | 42.0 | 2  |
| 90.  | P0A7J3 | 3,267 | 32.7 | 9  |
| 91.  | P60438 | 3,204 | 41.6 | 6  |
| 92.  | P0A717 | 3,196 | 43.2 | 12 |
| 93.  | P0A850 | 3,139 | 32.2 | 15 |
| 94.  | P0A6P1 | 3,135 | 58.7 | 17 |
| 95.  | P69441 | 3,128 | 37.9 | 9  |
| 96.  | P00509 | 3,053 | 64.1 | 18 |
| 97.  | P0A715 | 2,928 | 25.7 | 7  |
| 98.  | P0AEK2 | 2,828 | 43.9 | 7  |
| 99.  | P0A825 | 2,828 | 45.3 | 14 |
| 100. | P06959 | 2,798 | 56.4 | 33 |
| 101. | P0A7R1 | 2,792 | 33.6 | 5  |
| 102. | P0A9C5 | 2,751 | 32.8 | 12 |
| 103. | P15288 | 2,687 | 20.4 | 10 |
| 104. | P0A7D7 | 2,633 | 43.0 | 13 |
| 105. | P0ADB1 | 2,565 | 40.2 | 2  |
| 106. | P23538 | 2,518 | 30.4 | 29 |
| 107. | P0A6Y1 | 2,487 | 22.3 | 4  |
| 108. | P56614 | 2,467 | 17.5 | 2  |
| 109. | P0A707 | 2,397 | 37.8 | 5  |
| 110. | P0AG67 | 2,391 | 23.9 | 15 |
| 111. | P0A991 | 2,253 | 42.0 | 12 |
| 112. | P0A8T7 | 2,156 | 30.9 | 38 |
| 113. | P0ABP8 | 2,133 | 38.5 | 15 |
| 114. | P28304 | 2,130 | 29.1 | 9  |
| 115. | P0AEQ3 | 1,965 | 32.7 | 7  |
| 116. | P0AAC0 | 1,924 | 37.7 | 7  |
| 117. | P23721 | 1,912 | 31.2 | 13 |
| 118. | P37051 | 1,871 | 20.7 | 3  |
| 119. | P31658 | 1,856 | 15.9 | 5  |

**Documentation of Peptide and Protein Identifications**  
*eFASP-0.1%DCA-0.1%nOG (see Table 3A)*

|      |        |       |      |    |
|------|--------|-------|------|----|
| 120. | P0A6T9 | 1,840 | 17.8 | 1  |
| 121. | P0ABH7 | 1,822 | 15.9 | 11 |
| 122. | P0A9L3 | 1,787 | 30.6 | 9  |
| 123. | P0ABD8 | 1,754 | 34.0 | 6  |
| 124. | P00934 | 1,668 | 25.2 | 9  |
| 125. | P0A953 | 1,621 | 21.9 | 8  |
| 126. | P00962 | 1,605 | 14.4 | 9  |
| 127. | P75691 | 1,510 | 23.2 | 8  |
| 128. | P0A8A0 | 1,495 | 20.3 | 7  |
| 129. | P0AAI9 | 1,494 | 31.7 | 7  |
| 130. | P0A7L0 | 1,469 | 44.0 | 9  |
| 131. | P0A7D4 | 1,454 | 29.2 | 15 |
| 132. | P0AB80 | 1,439 | 24.0 | 7  |
| 133. | P0AE12 | 1,402 | 17.2 | 11 |
| 134. | P0A867 | 1,399 | 25.3 | 9  |
| 135. | P0A8V2 | 1,376 | 28.9 | 34 |
| 136. | P0A905 | 1,375 | 59.4 | 7  |
| 137. | P0AGE6 | 1,373 | 21.8 | 2  |
| 138. | P0A998 | 1,367 | 13.9 | 3  |
| 139. | P0A6K6 | 1,330 | 15.5 | 9  |
| 140. | P0A7Z0 | 1,320 | 33.3 | 6  |
| 141. | P37194 | 1,319 | 25.0 | 3  |
| 142. | P09372 | 1,290 | 19.8 | 6  |
| 143. | P0A9Q7 | 1,273 | 24.2 | 25 |
| 144. | P0A9A6 | 1,261 | 35.5 | 14 |
| 145. | P0ABD5 | 1,255 | 24.8 | 12 |
| 146. | P76422 | 1,238 | 30.8 | 10 |
| 147. | P05791 | 1,228 | 20.9 | 15 |
| 148. | P77747 | 1,213 | 9.0  | 8  |
| 149. | P0A8L1 | 1,203 | 19.5 | 14 |
| 150. | P04128 | 1,189 | 26.9 | 2  |
| 151. | P0AAA1 | 1,149 | 7.4  | 1  |
| 152. | P60624 | 1,143 | 29.8 | 5  |
| 153. | P0AAI3 | 1,141 | 25.6 | 15 |
| 154. | P0ACA3 | 1,125 | 18.9 | 6  |
| 155. | P36995 | 1,108 | 43.7 | 9  |
| 156. | P0A9M8 | 1,085 | 25.5 | 20 |
| 157. | P0C0V0 | 1,078 | 22.2 | 13 |
| 158. | P02930 | 1,071 | 20.7 | 14 |
| 159. | P0A7W1 | 1,043 | 35.9 | 8  |
| 160. | P77395 | 1,042 | 15.9 | 3  |

**Documentation of Peptide and Protein Identifications**  
*eFASP-0.1%DCA-0.1%nOG (see Table 3A)*

|      |        |       |      |    |
|------|--------|-------|------|----|
| 161. | P0AGE9 | 1,008 | 10.4 | 4  |
| 162. | P0A9Q1 | 996   | 31.5 | 10 |
| 163. | P0AEZ3 | 983   | 10.0 | 5  |
| 164. | P0C5W2 | 972   | 48.8 | 3  |
| 165. | P05055 | 962   | 21.0 | 20 |
| 166. | P0A8W8 | 949   | 26.2 | 9  |
| 167. | P0ADE8 | 940   | 20.6 | 13 |
| 168. | P39199 | 926   | 5.8  | 2  |
| 169. | P45578 | 891   | 21.1 | 6  |
| 170. | P0A8X0 | 881   | 11.5 | 2  |
| 171. | P0A6X3 | 858   | 24.5 | 2  |
| 172. | P0AET8 | 858   | 19.2 | 7  |
| 173. | P25526 | 853   | 10.4 | 8  |
| 174. | P63235 | 850   | 5.1  | 4  |
| 175. | P13979 | 849   | 19.7 | 6  |
| 176. | P0AF36 | 837   | 44.4 | 3  |
| 177. | P0AED0 | 827   | 45.8 | 2  |
| 178. | P25553 | 825   | 19.8 | 13 |
| 179. | P25516 | 824   | 14.8 | 17 |
| 180. | P0AEE5 | 815   | 25.0 | 15 |
| 181. | P23869 | 811   | 24.4 | 4  |
| 182. | P0A805 | 804   | 19.5 | 7  |
| 183. | P0AFF6 | 804   | 26.7 | 16 |
| 184. | P06999 | 801   | 16.2 | 6  |
| 185. | P0AFG3 | 764   | 19.0 | 26 |
| 186. | P0AEM9 | 756   | 18.1 | 12 |
| 187. | P33602 | 751   | 14.4 | 15 |
| 188. | P31663 | 749   | 19.1 | 9  |
| 189. | P77804 | 739   | 21.5 | 16 |
| 190. | P23843 | 738   | 23.2 | 8  |
| 191. | P0A877 | 737   | 17.9 | 6  |
| 192. | P0A955 | 728   | 30.5 | 3  |
| 193. | P24182 | 725   | 15.8 | 13 |
| 194. | P04805 | 723   | 12.1 | 9  |
| 195. | P32141 | 714   | 23.3 | 7  |
| 196. | P0AA16 | 712   | 28.0 | 12 |
| 197. | P15639 | 711   | 39.9 | 23 |
| 198. | P00954 | 693   | 10.5 | 9  |
| 199. | P00961 | 691   | 16.1 | 16 |
| 200. | P32144 | 691   | 26.8 | 7  |
| 201. | P0AEP3 | 685   | 20.5 | 6  |

**Documentation of Peptide and Protein Identifications**  
*eFASP-0.1%DCA-0.1%nOG (see Table 3A)*

|      |        |     |      |    |
|------|--------|-----|------|----|
| 202. | P0A9T0 | 685 | 26.1 | 9  |
| 203. | Q9S4W7 | 683 | 24.1 | 3  |
| 204. | P0ADG7 | 682 | 24.8 | 10 |
| 205. | P76113 | 664 | 20.6 | 9  |
| 206. | P0AAH0 | 660 | 17.1 | 8  |
| 207. | P00561 | 652 | 14.0 | 21 |
| 208. | P31677 | 651 | 4.9  | 3  |
| 209. | Q47140 | 637 | 11.6 | 2  |
| 210. | P0A9M0 | 637 | 11.2 | 19 |
| 211. | P33599 | 637 | 11.4 | 15 |
| 212. | P0A855 | 633 | 17.4 | 14 |
| 213. | P36938 | 631 | 9.7  | 10 |
| 214. | P21599 | 629 | 24.0 | 14 |
| 215. | P76143 | 626 | 12.4 | 8  |
| 216. | P33570 | 625 | 20.2 | 12 |
| 217. | P0A7K6 | 623 | 33.0 | 4  |
| 218. | P22255 | 618 | 21.5 | 4  |
| 219. | P0A6H1 | 609 | 7.1  | 8  |
| 220. | P0A9K7 | 608 | 30.3 | 9  |
| 221. | P67910 | 585 | 17.1 | 8  |
| 222. | P42632 | 581 | 7.5  | 22 |
| 223. | P09831 | 579 | 12.1 | 37 |
| 224. | P60757 | 577 | 23.4 | 15 |
| 225. | P69407 | 564 | 11.1 | 4  |
| 226. | P09424 | 552 | 12.6 | 9  |
| 227. | P0A908 | 547 | 14.1 | 5  |
| 228. | P0A705 | 538 | 14.5 | 22 |
| 229. | P07017 | 511 | 19.0 | 7  |
| 230. | P23331 | 507 | 16.1 | 6  |
| 231. | P27298 | 507 | 9.6  | 16 |
| 232. | P12758 | 503 | 9.1  | 3  |
| 233. | P04846 | 502 | 19.1 | 5  |
| 234. | P07118 | 493 | 9.0  | 21 |
| 235. | P32681 | 492 | 16.0 | 6  |
| 236. | P15640 | 492 | 9.8  | 13 |
| 237. | P16689 | 489 | 14.3 | 11 |
| 238. | P15034 | 489 | 14.7 | 7  |
| 239. | P45463 | 474 | 9.7  | 8  |
| 240. | P37685 | 467 | 12.5 | 10 |
| 241. | P77774 | 466 | 12.8 | 8  |
| 242. | P32132 | 461 | 8.7  | 7  |

**Documentation of Peptide and Protein Identifications**  
*eFASP-0.1%DCA-0.1%nOG (see Table 3A)*

|      |        |     |      |    |
|------|--------|-----|------|----|
| 243. | P37624 | 458 | 10.4 | 21 |
| 244. | P0A817 | 458 | 8.6  | 7  |
| 245. | P0AEZ9 | 453 | 14.7 | 5  |
| 246. | Q9JMS0 | 451 | 21.1 | 6  |
| 247. | P0ADY1 | 449 | 6.9  | 12 |
| 248. | P0AAT9 | 443 | 22.5 | 6  |
| 249. | P76486 | 442 | 26.5 | 4  |

## Documentation of Peptide and Protein Identifications

*FASP* (see Table 4)

### **FASP** (see Table 4)

|     | Accession | Score  | Coverage, % | Peptide matches |
|-----|-----------|--------|-------------|-----------------|
| 1.  | P69776    | 12,358 | 48.7        | 5               |
| 2.  | P0A910    | 2,931  | 42.5        | 14              |
| 3.  | P64581    | 2,422  | 32.7        | 3               |
| 4.  | P0AEH5    | 1,827  | 40.6        | 6               |
| 5.  | P0A6N1    | 1,080  | 49.5        | 15              |
| 6.  | P0A9B2    | 954    | 50.2        | 14              |
| 7.  | P0AA04    | 831    | 31.8        | 6               |
| 8.  | P0ADE6    | 657    | 24.2        | 8               |
| 9.  | P00761    | 626    | 22.9        | 4               |
| 10. | P06996    | 613    | 30.0        | 10              |
| 11. | P0A7R5    | 573    | 35.0        | 8               |
| 12. | P0A6F9    | 545    | 42.3        | 3               |
| 13. | P0A912    | 472    | 12.7        | 6               |
| 14. | P0A6X7    | 467    | 22.2        | 7               |
| 15. | P69783    | 455    | 34.3        | 3               |
| 16. | P00489    | 426    | 25.2        | 33              |
| 17. | P00634    | 404    | 7.9         | 8               |
| 18. | P75948    | 381    | 18.6        | 5               |
| 19. | P0A7J7    | 368    | 25.4        | 8               |
| 20. | P0AG82    | 351    | 22.5        | 10              |
| 21. | P21420    | 16     | 0.0         | 1               |



**Documentation of Peptide and Protein Identifications**  
*FASP-T20 (see Table 4)*

**FASP-T20** (see Table 4)

|     | Accession | Score  | Coverage, % | Peptide matches |
|-----|-----------|--------|-------------|-----------------|
| 1.  | P69776    | 22,767 | 65.4        | 6               |
| 2.  | P0A910    | 6,150  | 59.8        | 17              |
| 3.  | P0A6N1    | 4,961  | 65.0        | 21              |
| 4.  | P0ACF0    | 4,335  | 54.4        | 4               |
| 5.  | P0AEH5    | 3,710  | 50.5        | 4               |
| 6.  | P64581    | 3,543  | 50.5        | 7               |
| 7.  | P0AG82    | 2,758  | 41.3        | 13              |
| 8.  | P0A9B2    | 2,526  | 54.1        | 15              |
| 9.  | P06996    | 1,958  | 40.3        | 13              |
| 10. | P0ADE6    | 1,929  | 43.0        | 10              |
| 11. | P0ADB7    | 1,896  | 39.6        | 1               |
| 12. | P0ABT2    | 1,748  | 70.1        | 10              |
| 13. | P0A6X7    | 1,656  | 38.4        | 7               |
| 14. | P0A6M8    | 1,177  | 37.9        | 26              |
| 15. | P69783    | 1,100  | 24.9        | 5               |
| 16. | P0A8G6    | 1,082  | 44.4        | 7               |
| 17. | P0A7R1    | 1,048  | 49.7        | 9               |
| 18. | P00634    | 1,025  | 35.9        | 17              |
| 19. | P0A6F5    | 985    | 33.8        | 21              |
| 20. | P0A6P9    | 980    | 30.6        | 16              |
| 21. | P0A6Y8    | 940    | 38.2        | 29              |
| 22. | P0A7V0    | 772    | 40.7        | 9               |
| 23. | P0AG55    | 756    | 6.8         | 3               |
| 24. | P0A7V3    | 686    | 19.3        | 6               |
| 25. | P28635    | 662    | 59.0        | 9               |
| 26. | P0A6F9    | 661    | 42.3        | 4               |
| 27. | P0AF93    | 612    | 10.2        | 2               |
| 28. | P0A7K2    | 597    | 50.4        | 7               |
| 29. | P0A799    | 562    | 21.5        | 9               |
| 30. | P0A7S3    | 501    | 16.9        | 5               |
| 31. | P0A7R5    | 491    | 23.3        | 4               |
| 32. | P00761    | 466    | 7.8         | 2               |
| 33. | P0A862    | 457    | 45.2        | 5               |
| 34. | P45531    | 438    | 26.1        | 2               |
| 35. | P0A836    | 417    | 19.6        | 13              |
| 36. | P0AFG6    | 415    | 21.2        | 8               |

## Documentation of Peptide and Protein Identifications

*FASP-T20 (see Table 4)*

|     |            |     |      |    |
|-----|------------|-----|------|----|
| 37. | P60723     | 390 | 26.9 | 7  |
| 38. | P09372     | 385 | 28.4 | 7  |
| 39. | P0ACF8     | 382 | 23.4 | 5  |
| 40. | P0ABK5     | 382 | 17.7 | 10 |
| 41. | P17854     | 359 | 15.6 | 7  |
| 42. | P0A7D4     | 352 | 22.0 | 11 |
| 43. | P0A9P0     | 349 | 12.2 | 13 |
| 44. | P0A912     | 342 | 9.8  | 8  |
| 45. | P0A7Z4     | 329 | 5.2  | 8  |
| 46. | P06959     | 321 | 14.3 | 15 |
| 47. | P08200     | 311 | 15.4 | 10 |
| 48. | P0AFH8     | 303 | 11.9 | 4  |
| 49. | P0A7L0     | 282 | 18.8 | 9  |
| 50. | P37690     | 282 | 17.9 | 23 |
| 51. | RANDOM3067 | 1   | 0.0  | 1  |
| 52. | P37624     | 71  | 0.8  | 2  |

**Documentation of Peptide and Protein Identifications**  
*eFASP-0.2%DCA (see Table 4)*

**eFASP-0.2%DCA** (see Table 4)

|     | Accession | Score  | Coverage, % | Peptide matches |
|-----|-----------|--------|-------------|-----------------|
| 1.  | P69776    | 85,232 | 48.7        | 5               |
| 2.  | P0A6N1    | 76,991 | 65.7        | 19              |
| 3.  | P0ABT2    | 49,901 | 76.1        | 12              |
| 4.  | P0A910    | 46,407 | 56.7        | 17              |
| 5.  | P0AG82    | 36,771 | 57.5        | 19              |
| 6.  | P0ACF0    | 36,620 | 62.2        | 6               |
| 7.  | P0A862    | 32,059 | 74.4        | 8               |
| 8.  | P0A9B2    | 31,982 | 71.0        | 18              |
| 9.  | P0AET2    | 30,755 | 57.4        | 5               |
| 10. | P0ACF8    | 28,945 | 59.9        | 10              |
| 11. | P69783    | 22,973 | 53.9        | 7               |
| 12. | P0ADB7    | 22,058 | 45.8        | 2               |
| 13. | P06996    | 19,685 | 55.9        | 17              |
| 14. | P0AEH5    | 19,616 | 36.6        | 3               |
| 15. | P0A799    | 19,292 | 55.6        | 19              |
| 16. | P0A6P9    | 18,578 | 54.6        | 20              |
| 17. | P0A6F5    | 16,981 | 76.8        | 32              |
| 18. | P0AES9    | 15,913 | 25.5        | 2               |
| 19. | P0A6F9    | 15,795 | 52.6        | 4               |
| 20. | P0ABD3    | 14,691 | 54.4        | 9               |
| 21. | P00634    | 14,643 | 70.7        | 22              |
| 22. | P0C0L2    | 14,357 | 50.4        | 5               |
| 23. | P08200    | 13,915 | 49.0        | 16              |
| 24. | P69910    | 13,204 | 55.6        | 18              |
| 25. | P69908    | 13,120 | 57.7        | 19              |
| 26. | P64581    | 12,805 | 25.7        | 2               |
| 27. | P0A917    | 11,368 | 62.6        | 7               |
| 28. | P0AB71    | 10,724 | 38.4        | 10              |
| 29. | P0AA25    | 10,697 | 55.1        | 6               |
| 30. | P0ABK5    | 10,668 | 64.1        | 14              |
| 31. | P0AE08    | 10,100 | 66.3        | 9               |
| 32. | P62707    | 10,072 | 30.8        | 7               |
| 33. | P0A6Y8    | 9,973  | 63.5        | 29              |
| 34. | P0AEU7    | 8,967  | 54.0        | 6               |
| 35. | P0A905    | 8,675  | 35.5        | 5               |
| 36. | P77717    | 8,192  | 83.2        | 6               |
| 37. | P0A6M8    | 8,153  | 56.4        | 34              |

**Documentation of Peptide and Protein Identifications**  
*eFASP-0.2%DCA (see Table 4)*

|     |        |       |      |    |
|-----|--------|-------|------|----|
| 38. | P21367 | 7,947 | 58.2 | 8  |
| 39. | P0ADE6 | 7,788 | 42.3 | 7  |
| 40. | P61889 | 7,521 | 57.4 | 14 |
| 41. | P0A870 | 7,188 | 64.4 | 17 |
| 42. | P28635 | 6,980 | 61.3 | 10 |
| 43. | P63284 | 6,911 | 56.5 | 36 |
| 44. | P0AEK4 | 6,527 | 48.5 | 12 |
| 45. | Q2M7R5 | 6,416 | 46.4 | 3  |
| 46. | P0A836 | 6,321 | 43.6 | 13 |
| 47. | P0A8G6 | 5,958 | 54.6 | 7  |
| 48. | P00350 | 5,807 | 58.6 | 21 |
| 49. | P0A7V3 | 5,732 | 51.9 | 10 |
| 50. | P00761 | 5,645 | 32.9 | 5  |
| 51. | P09373 | 5,532 | 52.8 | 28 |
| 52. | P0ABB4 | 5,510 | 60.0 | 19 |
| 53. | P0A9P0 | 5,418 | 30.6 | 9  |
| 54. | P0AF93 | 5,292 | 41.4 | 3  |
| 55. | P00448 | 5,161 | 30.1 | 7  |
| 56. | P0A6X7 | 5,018 | 56.6 | 7  |
| 57. | P0A7K2 | 4,996 | 44.6 | 6  |
| 58. | P0AFG6 | 4,855 | 33.8 | 12 |
| 59. | P0A991 | 4,774 | 51.7 | 14 |
| 60. | P0A7J3 | 4,696 | 54.6 | 7  |
| 61. | P0AD61 | 4,673 | 47.2 | 15 |
| 62. | P0A717 | 4,647 | 49.2 | 14 |
| 63. | P0A7R1 | 4,555 | 60.4 | 8  |
| 64. | P0A825 | 4,463 | 48.7 | 17 |
| 65. | P0A7D7 | 4,458 | 48.5 | 10 |
| 66. | P0AG55 | 4,454 | 35.0 | 5  |
| 67. | P0ACF4 | 4,451 | 25.6 | 2  |
| 68. | P0A6P1 | 4,414 | 40.3 | 12 |
| 69. | P0A9Y6 | 4,391 | 62.3 | 3  |
| 70. | P09372 | 4,143 | 32.5 | 3  |
| 71. | P0A7L0 | 4,024 | 29.5 | 7  |
| 72. | P0AC69 | 4,009 | 21.7 | 2  |
| 73. | P0A858 | 4,001 | 57.3 | 8  |
| 74. | P04128 | 3,944 | 40.7 | 3  |
| 75. | P21420 | 3,890 | 34.3 | 12 |
| 76. | P60723 | 3,773 | 24.4 | 3  |
| 77. | P0AFG8 | 3,723 | 40.4 | 27 |
| 78. | P0AAH0 | 3,630 | 42.8 | 9  |

**Documentation of Peptide and Protein Identifications**  
*eFASP-0.2%DCA (see Table 4)*

|      |        |       |      |    |
|------|--------|-------|------|----|
| 79.  | P02932 | 3,499 | 47.3 | 14 |
| 80.  | P0A9D8 | 3,442 | 39.4 | 9  |
| 81.  | P0A7V8 | 3,360 | 28.6 | 6  |
| 82.  | P0ACJ8 | 3,270 | 35.2 | 9  |
| 83.  | P0AFH8 | 3,165 | 39.3 | 6  |
| 84.  | P0AGD3 | 3,162 | 37.3 | 7  |
| 85.  | P0A8E7 | 3,077 | 48.5 | 6  |
| 86.  | P0AG80 | 3,053 | 44.5 | 15 |
| 87.  | P0A850 | 2,988 | 35.2 | 19 |
| 88.  | P00509 | 2,957 | 48.5 | 15 |
| 89.  | P0A7V0 | 2,924 | 48.6 | 9  |
| 90.  | P0A912 | 2,838 | 42.8 | 6  |
| 91.  | P0AG86 | 2,752 | 22.6 | 3  |
| 92.  | P0AF70 | 2,747 | 48.7 | 2  |
| 93.  | P0AB80 | 2,734 | 27.8 | 7  |
| 94.  | P0A867 | 2,700 | 25.6 | 7  |
| 95.  | P06959 | 2,699 | 38.4 | 21 |
| 96.  | P0AG44 | 2,686 | 33.9 | 7  |
| 97.  | P0A7L3 | 2,668 | 28.0 | 4  |
| 98.  | P0A715 | 2,608 | 41.2 | 9  |
| 99.  | P0A7J7 | 2,605 | 54.2 | 5  |
| 100. | P0A7W1 | 2,598 | 37.7 | 5  |
| 101. | P0AC62 | 2,597 | 57.8 | 4  |
| 102. | P31658 | 2,582 | 17.3 | 4  |
| 103. | P0A7S9 | 2,555 | 26.3 | 2  |
| 104. | P13979 | 2,538 | 34.0 | 14 |
| 105. | P0A7D4 | 2,377 | 37.0 | 13 |
| 106. | P0A7X3 | 2,303 | 38.5 | 7  |
| 107. | P0A9Q9 | 2,259 | 34.3 | 10 |
| 108. | P02359 | 2,224 | 38.6 | 7  |
| 109. | P0A9C5 | 2,221 | 44.1 | 15 |
| 110. | P0ABP8 | 2,205 | 42.7 | 9  |
| 111. | P0A6X3 | 2,201 | 12.8 | 1  |
| 112. | P0A9Q7 | 2,157 | 35.2 | 21 |
| 113. | P60438 | 2,143 | 14.4 | 4  |
| 114. | P0ADB1 | 2,033 | 77.7 | 6  |
| 115. | P0AAN9 | 1,970 | 31.4 | 1  |
| 116. | P08839 | 1,952 | 40.7 | 21 |
| 117. | P61175 | 1,946 | 47.3 | 4  |
| 118. | P68699 | 1,923 | 20.3 | 3  |
| 119. | P0A7R9 | 1,895 | 30.2 | 3  |

**Documentation of Peptide and Protein Identifications**  
*eFASP-0.2%DCA (see Table 4)*

|      |        |       |      |    |
|------|--------|-------|------|----|
| 120. | P0ABB0 | 1,893 | 29.4 | 19 |
| 121. | P61714 | 1,887 | 46.8 | 5  |
| 122. | P69441 | 1,858 | 38.3 | 8  |
| 123. | P0AAC0 | 1,827 | 28.2 | 4  |
| 124. | P62768 | 1,811 | 41.4 | 8  |
| 125. | P0C0V0 | 1,766 | 35.2 | 11 |
| 126. | P0AGE9 | 1,740 | 29.1 | 8  |
| 127. | P0AEK2 | 1,702 | 28.7 | 6  |
| 128. | P02413 | 1,661 | 25.7 | 7  |
| 129. | P0ABH7 | 1,613 | 31.4 | 11 |
| 130. | P0A8V2 | 1,571 | 28.8 | 34 |
| 131. | P23538 | 1,547 | 21.5 | 17 |
| 132. | P39177 | 1,535 | 37.3 | 4  |
| 133. | P0ADQ7 | 1,486 | 9.7  | 2  |
| 134. | P0AEZ3 | 1,463 | 28.5 | 9  |
| 135. | P28304 | 1,435 | 30.0 | 8  |
| 136. | P0AC59 | 1,342 | 27.4 | 6  |
| 137. | P0ACX3 | 1,329 | 14.9 | 2  |
| 138. | P0ABD5 | 1,323 | 40.4 | 10 |
| 139. | P23721 | 1,298 | 24.3 | 13 |
| 140. | P0AEZ9 | 1,293 | 34.1 | 5  |
| 141. | P0A805 | 1,283 | 25.4 | 6  |
| 142. | P0AE12 | 1,275 | 22.9 | 13 |
| 143. | P61517 | 1,257 | 16.4 | 8  |
| 144. | P0ADE8 | 1,249 | 31.9 | 12 |
| 145. | P0A955 | 1,237 | 30.1 | 5  |
| 146. | P0A8T7 | 1,212 | 23.1 | 36 |
| 147. | P0AEM9 | 1,200 | 42.1 | 9  |
| 148. | P02358 | 1,163 | 21.5 | 4  |
| 149. | P0AGE6 | 1,161 | 21.8 | 4  |
| 150. | P0AA10 | 1,148 | 28.2 | 4  |
| 151. | P0A998 | 1,139 | 7.9  | 2  |
| 152. | P75818 | 1,138 | 10.5 | 5  |
| 153. | P0AGE0 | 1,119 | 30.3 | 4  |
| 154. | P23843 | 1,110 | 19.0 | 9  |
| 155. | P06999 | 1,106 | 26.2 | 8  |
| 156. | P0AFG3 | 1,099 | 18.1 | 17 |
| 157. | P0AG30 | 1,085 | 27.7 | 13 |
| 158. | P0ACA3 | 1,032 | 26.9 | 6  |
| 159. | P0A8L1 | 1,031 | 29.8 | 10 |
| 160. | P05793 | 1,018 | 37.5 | 17 |

**Documentation of Peptide and Protein Identifications**  
*eFASP-0.2%DCA (see Table 4)*

|      |        |     |      |    |
|------|--------|-----|------|----|
| 161. | P0A953 | 988 | 17.7 | 8  |
| 162. | P33602 | 978 | 17.6 | 18 |
| 163. | P0ABJ9 | 972 | 19.0 | 9  |
| 164. | P0A6K6 | 931 | 17.7 | 10 |
| 165. | P0ABD8 | 888 | 21.8 | 2  |
| 166. | P21599 | 874 | 33.8 | 14 |
| 167. | P0ABF6 | 870 | 18.7 | 6  |
| 168. | P0A763 | 865 | 11.9 | 2  |
| 169. | P15288 | 847 | 25.4 | 13 |
| 170. | P0A9K7 | 843 | 26.1 | 6  |
| 171. | P10908 | 843 | 13.8 | 7  |
| 172. | P05791 | 841 | 19.3 | 17 |
| 173. | P0AG67 | 831 | 25.7 | 17 |
| 174. | P0A7Z4 | 825 | 23.7 | 8  |
| 175. | P33599 | 823 | 14.8 | 11 |
| 176. | P31979 | 819 | 16.4 | 11 |
| 177. | P00954 | 814 | 19.5 | 6  |
| 178. | P61949 | 784 | 35.8 | 4  |
| 179. | P0A6H5 | 778 | 21.7 | 13 |
| 180. | P25665 | 764 | 18.2 | 16 |
| 181. | P0A9T0 | 746 | 9.3  | 7  |
| 182. | P0A6Z3 | 738 | 17.0 | 18 |
| 183. | P61316 | 737 | 24.1 | 6  |
| 184. | P15639 | 734 | 20.0 | 18 |
| 185. | P0A9A6 | 712 | 25.1 | 11 |
| 186. | P09832 | 707 | 17.6 | 13 |
| 187. | P0ADG7 | 705 | 28.1 | 10 |
| 188. | P0ABA6 | 700 | 13.6 | 8  |
| 189. | P33570 | 694 | 7.5  | 12 |
| 190. | P0AAI3 | 682 | 18.0 | 16 |
| 191. | P0A705 | 663 | 19.1 | 20 |
| 192. | P0C0S1 | 654 | 3.9  | 3  |
| 193. | P0A7K6 | 644 | 13.0 | 3  |
| 194. | P00962 | 642 | 21.1 | 21 |
| 195. | P25516 | 631 | 14.7 | 21 |
| 196. | P37051 | 631 | 9.3  | 2  |
| 197. | P69924 | 615 | 9.0  | 7  |
| 198. | P45578 | 611 | 22.8 | 5  |
| 199. | P25553 | 605 | 13.8 | 14 |
| 200. | P75893 | 603 | 32.3 | 4  |
| 201. | P00961 | 599 | 21.6 | 17 |

**Documentation of Peptide and Protein Identifications**  
*eFASP-0.2%DCA (see Table 4)*

|      |        |     |      |    |
|------|--------|-----|------|----|
| 202. | P00957 | 596 | 15.1 | 18 |
| 203. | P02930 | 585 | 16.0 | 12 |
| 204. | P0A6T1 | 582 | 20.8 | 15 |
| 205. | P32141 | 577 | 29.1 | 9  |
| 206. | P0AEG4 | 570 | 12.0 | 4  |
| 207. | P0A8F0 | 567 | 19.7 | 7  |
| 208. | P0A855 | 553 | 14.7 | 10 |
| 209. | P40874 | 551 | 21.5 | 6  |
| 210. | P0A8N5 | 546 | 14.7 | 12 |
| 211. | P0ACU5 | 536 | 14.0 | 4  |
| 212. | P0ABA4 | 530 | 12.4 | 6  |
| 213. | P0A8N3 | 527 | 12.5 | 12 |
| 214. | P45523 | 524 | 25.9 | 10 |
| 215. | P10907 | 520 | 5.9  | 1  |
| 216. | P24182 | 496 | 17.4 | 15 |
| 217. | P0A7Z0 | 491 | 19.2 | 4  |
| 218. | P0AC84 | 487 | 8.8  | 1  |
| 219. | P76362 | 486 | 27.0 | 4  |
| 220. | P0AAH8 | 477 | 22.8 | 7  |
| 221. | P30178 | 475 | 19.9 | 6  |
| 222. | P62399 | 471 | 26.3 | 4  |
| 223. | P0AAI9 | 469 | 13.9 | 2  |
| 224. | P0A8M0 | 464 | 15.7 | 13 |
| 225. | P0A9X4 | 459 | 7.5  | 8  |
| 226. | P23847 | 453 | 15.3 | 12 |
| 227. | P0A8X0 | 451 | 15.9 | 4  |
| 228. | P63235 | 451 | 6.5  | 5  |
| 229. | P0A993 | 449 | 7.8  | 4  |
| 230. | P05055 | 447 | 8.2  | 18 |
| 231. | P15082 | 446 | 9.7  | 2  |
| 232. | P25534 | 443 | 13.0 | 9  |
| 233. | P76658 | 437 | 13.4 | 11 |
| 234. | P0A9M8 | 435 | 17.2 | 14 |
| 235. | P0A722 | 434 | 32.8 | 5  |
| 236. | P00968 | 424 | 16.1 | 29 |
| 237. | P24216 | 423 | 9.0  | 6  |
| 238. | P07650 | 423 | 18.0 | 7  |
| 239. | P04805 | 421 | 14.4 | 12 |
| 240. | P15877 | 418 | 10.2 | 11 |
| 241. | P0AEU0 | 415 | 21.9 | 7  |
| 242. | P0AAX8 | 405 | 17.3 | 4  |



**Documentation of Peptide and Protein Identifications**  
*eFASP-0.2%DCA (see Table 4)*

|      |        |     |      |    |
|------|--------|-----|------|----|
| 243. | P22106 | 399 | 11.9 | 19 |
| 244. | P04949 | 396 | 18.7 | 15 |
| 245. | P36659 | 395 | 11.8 | 4  |
| 246. | P0A6Q3 | 390 | 24.4 | 7  |
| 247. | P22255 | 388 | 12.6 | 6  |
| 248. | P25690 | 386 | 8.2  | 8  |
| 249. | P37127 | 69  | 2.9  | 1  |
| 250. | O76011 | 237 | 3.9  | 4  |
| 251. | O76013 | 56  | 1.9  | 1  |
| 252. | Q15323 | 213 | 4.1  | 3  |

## Documentation of Peptide and Protein Identifications

*eFASP-0.2%DCA-T20 (see Table 4)*

### **eFASP-0.2%DCA-T20** (see Table 4)

|     | Accession | Score  | Coverage, % | Peptide matches |
|-----|-----------|--------|-------------|-----------------|
| 1.  | P69776    | 84,712 | 60.3        | 4               |
| 2.  | P0A6N1    | 57,754 | 60.7        | 19              |
| 3.  | P0A910    | 38,888 | 58.1        | 17              |
| 4.  | P0ABT2    | 38,143 | 79.6        | 13              |
| 5.  | P0ACF0    | 37,042 | 62.2        | 6               |
| 6.  | P0ACF8    | 30,968 | 62.8        | 9               |
| 7.  | P0AG82    | 28,811 | 59.3        | 19              |
| 8.  | P0A9B2    | 25,020 | 71.9        | 21              |
| 9.  | P0A862    | 24,069 | 73.8        | 7               |
| 10. | P06996    | 22,728 | 64.6        | 21              |
| 11. | P0AET2    | 22,155 | 57.4        | 5               |
| 12. | P0ADB7    | 21,185 | 45.8        | 2               |
| 13. | P0A6P9    | 17,193 | 68.5        | 24              |
| 14. | P0A917    | 16,039 | 43.9        | 6               |
| 15. | P69783    | 15,754 | 50.3        | 7               |
| 16. | P0A6F5    | 15,470 | 70.8        | 32              |
| 17. | P0A799    | 15,407 | 50.9        | 17              |
| 18. | P64581    | 14,942 | 31.7        | 3               |
| 19. | P0ABD3    | 14,844 | 58.9        | 8               |
| 20. | P0AEH5    | 13,362 | 35.6        | 3               |
| 21. | P08200    | 13,178 | 47.8        | 17              |
| 22. | P0AES9    | 12,113 | 25.5        | 1               |
| 23. | P00634    | 11,848 | 71.6        | 25              |
| 24. | P0COL2    | 10,536 | 41.3        | 4               |
| 25. | P69910    | 10,341 | 43.6        | 14              |
| 26. | P0A6M8    | 8,911  | 63.4        | 34              |
| 27. | P62707    | 8,285  | 35.2        | 9               |
| 28. | P0A8G6    | 8,207  | 53.0        | 7               |
| 29. | P0AEU7    | 8,178  | 58.4        | 9               |
| 30. | P0AA25    | 8,166  | 46.8        | 4               |
| 31. | P0AB71    | 8,050  | 33.4        | 8               |
| 32. | P61889    | 8,039  | 77.6        | 18              |
| 33. | P0A7J3    | 7,230  | 66.1        | 8               |
| 34. | P0AE08    | 7,182  | 57.8        | 9               |
| 35. | P0A870    | 7,028  | 67.2        | 17              |
| 36. | P0ABK5    | 6,409  | 36.5        | 10              |
| 37. | P0A7S9    | 6,210  | 26.3        | 2               |

**Documentation of Peptide and Protein Identifications**  
*eFASP-0.2%DCA-T20 (see Table 4)*

|     |        |       |      |    |
|-----|--------|-------|------|----|
| 38. | P0A912 | 6,000 | 31.8 | 5  |
| 39. | P0A6Y8 | 5,999 | 56.4 | 28 |
| 40. | P28635 | 5,971 | 60.9 | 11 |
| 41. | P0A858 | 5,971 | 44.7 | 8  |
| 42. | P0A905 | 5,868 | 31.6 | 4  |
| 43. | Q2M7R5 | 5,786 | 42.0 | 2  |
| 44. | P0ABB4 | 5,709 | 46.7 | 15 |
| 45. | P0A7K2 | 5,697 | 54.6 | 5  |
| 46. | P0A7R1 | 5,679 | 55.0 | 8  |
| 47. | P0A7V3 | 5,652 | 29.6 | 5  |
| 48. | P0ADB1 | 5,575 | 57.1 | 3  |
| 49. | P21420 | 5,457 | 42.5 | 13 |
| 50. | P0ACF4 | 5,105 | 25.6 | 2  |
| 51. | P0A6F9 | 4,922 | 47.4 | 4  |
| 52. | P0A836 | 4,861 | 44.3 | 16 |
| 53. | P00761 | 4,827 | 29.4 | 5  |
| 54. | P63284 | 4,669 | 59.6 | 43 |
| 55. | P0AAN9 | 4,642 | 31.4 | 2  |
| 56. | P0AFG6 | 4,506 | 31.4 | 9  |
| 57. | P09372 | 4,433 | 39.6 | 4  |
| 58. | P00350 | 4,409 | 52.4 | 18 |
| 59. | P77717 | 4,306 | 74.7 | 5  |
| 60. | P0A7D7 | 4,279 | 38.8 | 11 |
| 61. | P0A991 | 4,225 | 41.1 | 12 |
| 62. | P0AC69 | 4,175 | 36.5 | 4  |
| 63. | P0A9P0 | 4,158 | 29.1 | 11 |
| 64. | P0A7L0 | 4,091 | 46.2 | 8  |
| 65. | P09373 | 3,955 | 54.7 | 32 |
| 66. | P0A7V0 | 3,806 | 48.6 | 10 |
| 67. | P0AEK4 | 3,790 | 50.4 | 14 |
| 68. | P0A717 | 3,757 | 41.6 | 9  |
| 69. | P60723 | 3,723 | 35.3 | 7  |
| 70. | P21367 | 3,524 | 35.1 | 5  |
| 71. | P0A6A8 | 3,483 | 41.0 | 3  |
| 72. | P60438 | 3,427 | 18.7 | 3  |
| 73. | P0A9Y6 | 3,215 | 17.4 | 1  |
| 74. | P0A7J7 | 3,209 | 43.7 | 5  |
| 75. | P0A7L3 | 3,164 | 39.8 | 4  |
| 76. | P0A825 | 3,119 | 26.6 | 11 |
| 77. | P0AGD3 | 3,105 | 22.3 | 6  |

**Documentation of Peptide and Protein Identifications**  
*eFASP-0.2%DCA-T20 (see Table 4)*

|      |        |       |      |    |
|------|--------|-------|------|----|
| 78.  | P0A850 | 3,069 | 40.3 | 18 |
| 79.  | P0ACJ8 | 3,054 | 31.4 | 8  |
| 80.  | P0AD61 | 3,038 | 37.9 | 19 |
| 81.  | P0A867 | 2,998 | 42.4 | 12 |
| 82.  | P0ADE6 | 2,980 | 51.0 | 8  |
| 83.  | P0A7T7 | 2,867 | 13.3 | 2  |
| 84.  | P0AFH8 | 2,847 | 62.7 | 8  |
| 85.  | P0A7V8 | 2,824 | 32.0 | 9  |
| 86.  | P02932 | 2,671 | 47.0 | 16 |
| 87.  | P0AG86 | 2,609 | 23.2 | 3  |
| 88.  | P0A6P1 | 2,607 | 64.7 | 16 |
| 89.  | P0AFG8 | 2,554 | 40.3 | 27 |
| 90.  | P0ABB0 | 2,487 | 40.9 | 19 |
| 91.  | P00448 | 2,422 | 25.2 | 5  |
| 92.  | P0A7D4 | 2,414 | 41.0 | 15 |
| 93.  | P0AG55 | 2,346 | 40.1 | 8  |
| 94.  | P0A6X7 | 2,345 | 43.4 | 7  |
| 95.  | P13979 | 2,290 | 33.6 | 6  |
| 96.  | P0ADY7 | 2,241 | 28.7 | 4  |
| 97.  | P0AA10 | 2,211 | 28.2 | 4  |
| 98.  | P0AG44 | 2,189 | 42.5 | 7  |
| 99.  | P0AEQ3 | 2,151 | 45.2 | 9  |
| 100. | P61714 | 2,110 | 39.7 | 4  |
| 101. | P69441 | 2,104 | 49.5 | 8  |
| 102. | P0A7R5 | 2,082 | 41.8 | 4  |
| 103. | P0A7W1 | 2,051 | 61.7 | 7  |
| 104. | P23721 | 2,047 | 48.9 | 18 |
| 105. | P08839 | 1,981 | 34.1 | 16 |
| 106. | P00509 | 1,961 | 42.4 | 15 |
| 107. | P0AB80 | 1,930 | 25.2 | 9  |
| 108. | P0A715 | 1,857 | 29.9 | 9  |
| 109. | P0AG80 | 1,837 | 30.1 | 13 |
| 110. | P0AGE9 | 1,814 | 41.5 | 9  |
| 111. | P06959 | 1,806 | 37.3 | 23 |
| 112. | P45578 | 1,789 | 41.5 | 9  |
| 113. | P0A9Q9 | 1,761 | 33.2 | 9  |
| 114. | P0AG48 | 1,707 | 27.2 | 4  |
| 115. | P0AAH0 | 1,653 | 29.2 | 8  |
| 116. | P0ABP8 | 1,626 | 22.2 | 7  |
| 117. | P0ABA0 | 1,599 | 34.6 | 9  |

**Documentation of Peptide and Protein Identifications**  
*eFASP-0.2%DCA-T20 (see Table 4)*

|      |        |       |      |    |
|------|--------|-------|------|----|
| 118. | P02413 | 1,557 | 43.1 | 8  |
| 119. | P0AEK2 | 1,513 | 42.6 | 11 |
| 120. | P61517 | 1,508 | 16.8 | 5  |
| 121. | P45523 | 1,505 | 33.0 | 11 |
| 122. | P0ADW3 | 1,483 | 35.6 | 7  |
| 123. | P77695 | 1,471 | 43.9 | 4  |
| 124. | P0A8P3 | 1,463 | 25.3 | 4  |
| 125. | P61175 | 1,457 | 47.3 | 5  |
| 126. | P0A6K6 | 1,436 | 36.4 | 14 |
| 127. | P06999 | 1,432 | 17.8 | 5  |
| 128. | P12994 | 1,420 | 22.8 | 2  |
| 129. | P0ABH7 | 1,397 | 15.0 | 13 |
| 130. | P0A9C5 | 1,392 | 22.0 | 9  |
| 131. | P31658 | 1,392 | 24.0 | 6  |
| 132. | P0AEZ9 | 1,371 | 27.7 | 4  |
| 133. | P0A8T7 | 1,366 | 29.6 | 38 |
| 134. | P0A763 | 1,314 | 21.7 | 4  |
| 135. | P0ABD5 | 1,284 | 36.1 | 10 |
| 136. | P0A9Q7 | 1,245 | 30.4 | 23 |
| 137. | P0AF70 | 1,237 | 30.8 | 3  |
| 138. | P0ABD8 | 1,228 | 32.7 | 4  |
| 139. | P0A9K7 | 1,225 | 22.8 | 8  |
| 140. | P04128 | 1,198 | 26.9 | 2  |
| 141. | P02359 | 1,155 | 27.9 | 9  |
| 142. | P37665 | 1,154 | 40.2 | 7  |
| 143. | P0A6H5 | 1,147 | 20.8 | 12 |
| 144. | P23843 | 1,137 | 17.1 | 12 |
| 145. | P0A8E7 | 1,136 | 45.4 | 6  |
| 146. | P0AG30 | 1,133 | 37.2 | 14 |
| 147. | P0ACX3 | 1,131 | 24.8 | 2  |
| 148. | P0AEP3 | 1,097 | 10.9 | 4  |
| 149. | P0A6Z6 | 1,089 | 38.4 | 3  |
| 150. | P0AC62 | 1,083 | 27.7 | 3  |
| 151. | P23538 | 1,077 | 23.2 | 15 |
| 152. | P0A7R9 | 1,076 | 21.7 | 2  |
| 153. | P0AE12 | 1,070 | 25.8 | 13 |
| 154. | P0AAC0 | 1,041 | 23.1 | 5  |
| 155. | P0A8V2 | 1,022 | 23.6 | 41 |
| 156. | P0A9M8 | 1,016 | 26.6 | 13 |
| 157. | P0AEM9 | 977   | 27.1 | 13 |

**Documentation of Peptide and Protein Identifications**  
*eFASP-0.2%DCA-T20 (see Table 4)*

|      |        |     |      |    |
|------|--------|-----|------|----|
| 158. | P0A7Z0 | 968 | 21.5 | 5  |
| 159. | P0AC59 | 960 | 20.0 | 5  |
| 160. | P0ACA3 | 960 | 20.3 | 6  |
| 161. | P0ADE8 | 932 | 16.6 | 7  |
| 162. | P0AEZ3 | 925 | 20.7 | 6  |
| 163. | P15288 | 919 | 25.8 | 13 |
| 164. | P0A8L1 | 918 | 17.0 | 13 |
| 165. | P0A7F3 | 889 | 25.5 | 2  |
| 166. | P0A7G6 | 883 | 39.7 | 10 |
| 167. | P0A8M0 | 862 | 16.5 | 12 |
| 168. | P0A955 | 861 | 25.4 | 6  |
| 169. | P22106 | 823 | 11.0 | 11 |
| 170. | P31663 | 821 | 11.0 | 4  |
| 171. | P02358 | 805 | 21.5 | 3  |
| 172. | P0A805 | 800 | 28.1 | 4  |
| 173. | P0ABU5 | 790 | 25.8 | 5  |
| 174. | P0A9T0 | 773 | 20.7 | 10 |
| 175. | P37051 | 759 | 17.1 | 5  |
| 176. | P0AFG3 | 747 | 14.8 | 18 |
| 177. | P0AB14 | 744 | 25.3 | 3  |
| 178. | P00957 | 712 | 15.0 | 24 |
| 179. | P31979 | 710 | 22.9 | 12 |
| 180. | P25665 | 706 | 16.1 | 15 |
| 181. | P0A953 | 704 | 14.8 | 10 |
| 182. | P28304 | 702 | 13.8 | 9  |
| 183. | P0AG67 | 700 | 18.7 | 13 |
| 184. | P76402 | 691 | 22.7 | 5  |
| 185. | P0A6Z3 | 681 | 19.9 | 17 |
| 186. | P0A7X3 | 672 | 16.9 | 3  |
| 187. | Q46834 | 654 | 21.5 | 12 |
| 188. | P0A9P4 | 648 | 20.6 | 6  |
| 189. | P67910 | 641 | 25.8 | 11 |
| 190. | P62399 | 641 | 38.6 | 8  |
| 191. | P00956 | 640 | 19.8 | 22 |
| 192. | P61949 | 636 | 10.8 | 2  |
| 193. | P0A9A6 | 635 | 23.0 | 10 |
| 194. | P33221 | 629 | 14.3 | 7  |
| 195. | P09832 | 628 | 24.4 | 15 |
| 196. | P68206 | 624 | 17.4 | 2  |
| 197. | P0AAX8 | 622 | 27.8 | 5  |

**Documentation of Peptide and Protein Identifications**  
*eFASP-0.2%DCA-T20 (see Table 4)*

|      |        |     |      |    |
|------|--------|-----|------|----|
| 198. | P21599 | 615 | 21.7 | 10 |
| 199. | P0AE52 | 614 | 27.6 | 6  |
| 200. | P0AEG4 | 612 | 10.1 | 4  |
| 201. | P00954 | 604 | 17.1 | 8  |
| 202. | P02930 | 602 | 11.4 | 10 |
| 203. | P52697 | 595 | 22.1 | 5  |
| 204. | P24182 | 590 | 16.3 | 13 |
| 205. | P07862 | 577 | 8.8  | 8  |
| 206. | P15639 | 574 | 27.6 | 16 |
| 207. | P0C0V0 | 569 | 15.2 | 10 |
| 208. | P39177 | 565 | 11.3 | 3  |
| 209. | P64557 | 563 | 20.5 | 6  |
| 210. | P60906 | 562 | 14.9 | 9  |
| 211. | P02081 | 560 | 23.5 | 5  |
| 212. | P0A8R0 | 548 | 6.8  | 3  |
| 213. | P17846 | 547 | 14.7 | 12 |
| 214. | P0AB40 | 545 | 25.9 | 1  |
| 215. | P21889 | 537 | 22.9 | 18 |
| 216. | P05791 | 533 | 15.9 | 13 |
| 217. | P0A908 | 527 | 17.3 | 3  |
| 218. | P33602 | 521 | 21.2 | 19 |
| 219. | P05793 | 510 | 15.9 | 15 |
| 220. | P0AG84 | 508 | 14.6 | 4  |
| 221. | P77433 | 491 | 14.3 | 7  |
| 222. | P0A855 | 488 | 13.0 | 11 |
| 223. | P27298 | 482 | 12.9 | 13 |
| 224. | P0A8F0 | 478 | 15.9 | 4  |
| 225. | P30137 | 477 | 15.2 | 5  |
| 226. | P76658 | 474 | 29.4 | 11 |
| 227. | P0AEZ1 | 471 | 22.6 | 6  |
| 228. | P75970 | 470 | 39.5 | 4  |
| 229. | P33570 | 469 | 10.6 | 12 |
| 230. | P77774 | 469 | 26.0 | 9  |
| 231. | P25553 | 465 | 17.8 | 10 |
| 232. | P31697 | 454 | 32.4 | 10 |
| 233. | P0A8N5 | 447 | 16.4 | 11 |
| 234. | P00968 | 441 | 14.8 | 25 |
| 235. | P0AGE6 | 440 | 5.9  | 2  |
| 236. | P30177 | 433 | 7.5  | 9  |
| 237. | P0A7Z4 | 426 | 11.9 | 6  |

**Documentation of Peptide and Protein Identifications**  
*eFASP-0.2%DCA-T20 (see Table 4)*

|      |        |     |      |    |
|------|--------|-----|------|----|
| 238. | P27302 | 426 | 10.4 | 9  |
| 239. | P37666 | 415 | 13.3 | 6  |
| 240. | P26646 | 410 | 16.7 | 7  |
| 241. | P12758 | 410 | 26.5 | 5  |
| 242. | P15877 | 407 | 16.0 | 11 |
| 243. | P0ACY3 | 407 | 14.6 | 17 |
| 244. | P05055 | 403 | 14.2 | 15 |
| 245. | P75736 | 402 | 7.1  | 3  |
| 246. | P02924 | 398 | 10.6 | 13 |
| 247. | P36683 | 395 | 12.0 | 15 |
| 248. | P0A998 | 392 | 33.3 | 4  |
| 249. | P0ADG7 | 388 | 7.0  | 7  |
| 250. | P23847 | 388 | 9.0  | 6  |
| 251. | Q46807 | 387 | 14.5 | 8  |
| 252. | P0A8N3 | 383 | 10.7 | 12 |
| 253. | P0A6A3 | 378 | 13.3 | 6  |
| 254. | P77747 | 375 | 5.8  | 4  |
| 255. | P0AE39 | 374 | 23.0 | 6  |
| 256. | P77269 | 372 | 14.1 | 8  |
| 257. | P00561 | 366 | 10.0 | 14 |
| 258. | P63235 | 363 | 6.7  | 3  |
| 259. | P77454 | 363 | 19.7 | 3  |
| 260. | P0A6N4 | 355 | 21.8 | 6  |
| 261. | P0A8W0 | 354 | 25.1 | 5  |
| 262. | P00934 | 351 | 12.4 | 4  |
| 263. | P0A6T1 | 349 | 5.7  | 12 |
| 264. | P0A6H1 | 347 | 12.0 | 4  |
| 265. | P0A705 | 345 | 12.1 | 20 |
| 266. | P0AG40 | 342 | 25.6 | 7  |
| 267. | P0AG07 | 336 | 24.0 | 5  |
| 268. | P0AET8 | 327 | 13.7 | 5  |
| 269. | P17169 | 323 | 13.0 | 16 |
| 270. | P00962 | 323 | 11.0 | 14 |
| 271. | P25516 | 318 | 12.0 | 21 |
| 272. | P0AC41 | 315 | 18.0 | 12 |
| 273. | P10408 | 315 | 11.9 | 20 |
| 274. | Q46857 | 314 | 11.3 | 9  |
| 275. | P22255 | 313 | 21.1 | 4  |
| 276. | P37685 | 313 | 19.1 | 10 |
| 277. | P33353 | 311 | 10.8 | 9  |



**Documentation of Peptide and Protein Identifications**  
*eFASP-0.2%DCA-T20 (see Table 4)*

|      |            |     |      |    |
|------|------------|-----|------|----|
| 278. | P0A817     | 310 | 19.8 | 8  |
| 279. | P64596     | 307 | 22.0 | 7  |
| 280. | P16682     | 306 | 8.9  | 10 |
| 281. | P0A6L2     | 303 | 21.6 | 7  |
| 282. | P0ADS2     | 303 | 22.9 | 6  |
| 283. | RANDOM3428 | 84  | 1.5  | 1  |
| 284. | P42632     | 128 | 1.4  | 2  |

**Documentation of Peptide and Protein Identifications**  
*eFASP-0.2%DCA-4VP (see Table S1)*

**eFASP-0.2%DCA-4VP** (see Table S1)

|     | Accession | Score  | Coverage, % | Peptide matches |
|-----|-----------|--------|-------------|-----------------|
| 1.  | P69776    | 64,184 | 48.7        | 4               |
| 2.  | P0A6N1    | 61,613 | 69.3        | 23              |
| 3.  | P0ACF0    | 46,936 | 62.2        | 6               |
| 4.  | P0ABT2    | 40,923 | 68.3        | 14              |
| 5.  | P0A910    | 36,655 | 73.4        | 18              |
| 6.  | P0AG82    | 32,807 | 69.4        | 23              |
| 7.  | P0A9B2    | 29,264 | 59.8        | 18              |
| 8.  | P0A862    | 24,689 | 48.8        | 6               |
| 9.  | P0AET2    | 21,100 | 57.4        | 6               |
| 10. | P0A917    | 18,608 | 39.2        | 5               |
| 11. | P0ADB7    | 17,493 | 39.6        | 1               |
| 12. | P69783    | 17,314 | 53.9        | 7               |
| 13. | P0ABD3    | 16,923 | 53.8        | 7               |
| 14. | P0ACF8    | 16,832 | 46.0        | 6               |
| 15. | P0A6P9    | 16,216 | 64.1        | 21              |
| 16. | P0AEH5    | 15,312 | 32.7        | 3               |
| 17. | P06996    | 14,546 | 58.0        | 19              |
| 18. | P08200    | 14,447 | 56.0        | 19              |
| 19. | P64581    | 14,112 | 27.7        | 3               |
| 20. | P0A799    | 14,096 | 63.3        | 17              |
| 21. | P0C0L2    | 13,494 | 28.7        | 3               |
| 22. | P0A6F9    | 13,451 | 52.6        | 4               |
| 23. | P0A6F5    | 12,257 | 57.3        | 23              |
| 24. | P0AEU7    | 11,281 | 33.5        | 5               |
| 25. | P0AB71    | 11,227 | 47.1        | 12              |
| 26. | P00634    | 11,150 | 68.8        | 23              |
| 27. | P62707    | 10,150 | 44.4        | 10              |
| 28. | P69910    | 9,045  | 32.2        | 11              |
| 29. | P0A8G6    | 9,028  | 55.1        | 8               |
| 30. | P0A6Y8    | 8,565  | 66.8        | 34              |
| 31. | P0AA25    | 8,428  | 51.4        | 5               |
| 32. | P0ABK5    | 7,674  | 71.8        | 18              |
| 33. | P0AE08    | 7,444  | 58.8        | 10              |
| 34. | P28635    | 6,383  | 51.7        | 8               |
| 35. | P0AC69    | 6,380  | 46.1        | 6               |
| 36. | P77717    | 6,316  | 78.4        | 6               |
| 37. | P0ABB4    | 6,106  | 44.8        | 15              |

**Documentation of Peptide and Protein Identifications**  
*eFASP-0.2%DCA-4VP (see Table S1)*

|     |        |       |      |    |
|-----|--------|-------|------|----|
| 38. | P0A6X7 | 6,091 | 53.5 | 7  |
| 39. | P0A7R1 | 5,983 | 47.7 | 6  |
| 40. | P63284 | 5,854 | 58.6 | 39 |
| 41. | P0A870 | 5,652 | 50.8 | 13 |
| 42. | P0A6M8 | 5,535 | 56.3 | 32 |
| 43. | P00761 | 5,408 | 25.1 | 4  |
| 44. | P0A912 | 5,172 | 32.4 | 6  |
| 45. | P0ADE6 | 5,079 | 35.6 | 5  |
| 46. | P0A7V0 | 5,068 | 52.7 | 7  |
| 47. | P0AEK4 | 4,881 | 32.8 | 7  |
| 48. | P0A836 | 4,842 | 43.3 | 14 |
| 49. | P0A7V3 | 4,758 | 36.9 | 7  |
| 50. | P0AG86 | 4,635 | 29.7 | 3  |
| 51. | P0AFG6 | 4,615 | 26.7 | 7  |
| 52. | P61889 | 4,474 | 62.8 | 14 |
| 53. | P0A905 | 4,350 | 31.0 | 3  |
| 54. | P0A7J3 | 4,244 | 40.0 | 6  |
| 55. | P0A7D7 | 4,153 | 39.2 | 11 |
| 56. | P0A7K2 | 4,140 | 61.2 | 8  |
| 57. | P09373 | 4,121 | 53.0 | 29 |
| 58. | P0A858 | 3,960 | 32.6 | 6  |
| 59. | P0A7L0 | 3,890 | 32.9 | 8  |
| 60. | P00448 | 3,644 | 25.7 | 7  |
| 61. | P21367 | 3,478 | 41.8 | 7  |
| 62. | P21420 | 3,407 | 32.6 | 11 |
| 63. | P00350 | 3,381 | 36.8 | 12 |
| 64. | P60723 | 3,284 | 32.3 | 5  |
| 65. | P0AFG8 | 3,232 | 35.2 | 22 |
| 66. | P0AGD3 | 3,129 | 39.9 | 7  |
| 67. | P0A7J7 | 3,100 | 47.2 | 9  |
| 68. | P0A9P0 | 3,038 | 35.0 | 13 |
| 69. | P0A991 | 3,008 | 36.6 | 11 |
| 70. | P0ADW3 | 2,982 | 21.2 | 2  |
| 71. | P0AG48 | 2,945 | 24.3 | 3  |
| 72. | P0AD61 | 2,940 | 31.9 | 13 |
| 73. | P0A717 | 2,938 | 37.8 | 10 |
| 74. | P0AES9 | 2,903 | 25.5 | 1  |
| 75. | P02932 | 2,890 | 37.0 | 12 |
| 76. | P09372 | 2,869 | 36.0 | 4  |
| 77. | P0ABP8 | 2,718 | 41.4 | 7  |

**Documentation of Peptide and Protein Identifications**  
*eFASP-0.2%DCA-4VP (see Table S1)*

|      |        |       |      |    |
|------|--------|-------|------|----|
| 78.  | P0A850 | 2,600 | 34.0 | 18 |
| 79.  | P0A7S9 | 2,532 | 33.1 | 3  |
| 80.  | P0A825 | 2,492 | 44.6 | 15 |
| 81.  | P0AG55 | 2,464 | 48.6 | 5  |
| 82.  | P60438 | 2,457 | 27.3 | 5  |
| 83.  | P0A7X3 | 2,441 | 33.9 | 5  |
| 84.  | P0A7R5 | 2,330 | 32.0 | 5  |
| 85.  | P0A6X3 | 2,293 | 24.5 | 2  |
| 86.  | P0ACJ8 | 2,273 | 26.7 | 7  |
| 87.  | P06959 | 2,257 | 32.4 | 20 |
| 88.  | P0ABB0 | 2,254 | 42.1 | 21 |
| 89.  | P0A9D8 | 2,250 | 14.2 | 7  |
| 90.  | P0AG80 | 2,194 | 42.5 | 16 |
| 91.  | P08839 | 2,189 | 41.4 | 18 |
| 92.  | P0A9Y6 | 2,185 | 31.9 | 2  |
| 93.  | P69441 | 2,178 | 37.9 | 8  |
| 94.  | P0AB80 | 2,144 | 36.6 | 7  |
| 95.  | P00509 | 2,040 | 25.0 | 12 |
| 96.  | P0A7V8 | 1,981 | 38.8 | 8  |
| 97.  | P0A7W1 | 1,906 | 35.3 | 6  |
| 98.  | P0AEQ3 | 1,833 | 39.1 | 7  |
| 99.  | P0A715 | 1,808 | 26.4 | 7  |
| 100. | P23721 | 1,766 | 42.5 | 13 |
| 101. | P23843 | 1,718 | 16.0 | 10 |
| 102. | P02358 | 1,609 | 35.6 | 7  |
| 103. | P0A867 | 1,608 | 23.4 | 8  |
| 104. | P0A6P1 | 1,590 | 35.7 | 13 |
| 105. | P28304 | 1,576 | 44.0 | 12 |
| 106. | P0A8E7 | 1,565 | 53.4 | 9  |
| 107. | P0A8V2 | 1,559 | 28.9 | 41 |
| 108. | P0A9C5 | 1,534 | 30.7 | 12 |
| 109. | P0ADY7 | 1,522 | 33.8 | 6  |
| 110. | P0ACA3 | 1,455 | 22.2 | 6  |
| 111. | P0A9A6 | 1,451 | 25.9 | 10 |
| 112. | P61714 | 1,436 | 27.6 | 3  |
| 113. | P0A8W8 | 1,384 | 23.8 | 5  |
| 114. | P13979 | 1,382 | 28.7 | 8  |
| 115. | P0ABD8 | 1,371 | 22.4 | 2  |
| 116. | P0ABH7 | 1,336 | 21.6 | 9  |
| 117. | P0A8L1 | 1,333 | 28.1 | 13 |

**Documentation of Peptide and Protein Identifications**  
*eFASP-0.2%DCA-4VP (see Table S1)*

|      |        |       |      |    |
|------|--------|-------|------|----|
| 118. | P0A8P3 | 1,317 | 52.8 | 5  |
| 119. | P0A7D4 | 1,312 | 34.7 | 17 |
| 120. | P21599 | 1,286 | 34.2 | 12 |
| 121. | P0A9Q9 | 1,258 | 22.3 | 9  |
| 122. | P02359 | 1,248 | 17.3 | 6  |
| 123. | P02413 | 1,231 | 23.6 | 4  |
| 124. | P0AFH8 | 1,207 | 20.4 | 6  |
| 125. | P0A9Q7 | 1,137 | 26.6 | 19 |
| 126. | P15288 | 1,126 | 25.4 | 16 |
| 127. | P0AG67 | 1,122 | 25.7 | 19 |
| 128. | P0AEZ3 | 1,112 | 29.6 | 6  |
| 129. | P76569 | 1,097 | 29.4 | 3  |
| 130. | P0AC59 | 1,066 | 38.1 | 10 |
| 131. | P0A9Q1 | 1,036 | 28.6 | 10 |
| 132. | P25553 | 1,009 | 20.5 | 15 |
| 133. | P0AEZ9 | 995   | 20.6 | 3  |
| 134. | P0C0V0 | 975   | 31.2 | 12 |
| 135. | P0AGE9 | 956   | 26.0 | 9  |
| 136. | P24182 | 940   | 27.6 | 16 |
| 137. | P0A8T7 | 934   | 21.2 | 40 |
| 138. | P0AG30 | 931   | 22.7 | 11 |
| 139. | P0A707 | 923   | 36.7 | 8  |
| 140. | P31658 | 912   | 25.1 | 9  |
| 141. | Q47679 | 875   | 18.8 | 6  |
| 142. | P0AEM9 | 839   | 29.3 | 15 |
| 143. | P0AGE6 | 826   | 27.1 | 3  |
| 144. | P0A9T0 | 814   | 10.2 | 6  |
| 145. | P0ABD5 | 790   | 22.9 | 8  |
| 146. | P02930 | 787   | 20.9 | 11 |
| 147. | P0AAI9 | 777   | 20.4 | 5  |
| 148. | P0A9D2 | 762   | 26.4 | 8  |
| 149. | Q46857 | 746   | 26.9 | 9  |
| 150. | P0AAC0 | 722   | 20.9 | 9  |
| 151. | P0ACX3 | 705   | 14.9 | 4  |
| 152. | P0AE12 | 703   | 14.9 | 7  |
| 153. | P0A7Z0 | 698   | 16.0 | 4  |
| 154. | P0A8N5 | 668   | 13.9 | 11 |
| 155. | P25516 | 668   | 15.8 | 15 |
| 156. | P13029 | 632   | 6.8  | 14 |
| 157. | P0ADE8 | 629   | 12.6 | 9  |

**Documentation of Peptide and Protein Identifications**  
*eFASP-0.2%DCA-4VP (see Table S1)*

|      |        |     |      |    |
|------|--------|-----|------|----|
| 158. | P0A8M0 | 627 | 18.5 | 7  |
| 159. | P0ADP2 | 626 | 7.1  | 3  |
| 160. | P0A953 | 619 | 11.8 | 8  |
| 161. | P0AFI5 | 613 | 19.4 | 6  |
| 162. | P0A6L2 | 612 | 29.8 | 7  |
| 163. | P04805 | 608 | 30.6 | 18 |
| 164. | P0ABA4 | 597 | 26.0 | 4  |
| 165. | P0AC53 | 594 | 18.3 | 17 |
| 166. | P60757 | 591 | 27.4 | 7  |
| 167. | P23538 | 616 | 21.8 | 22 |
| 168. | P0A6T1 | 577 | 18.8 | 14 |
| 169. | P63235 | 564 | 6.7  | 6  |
| 170. | P0A9P4 | 555 | 6.2  | 5  |
| 171. | P0ADV7 | 552 | 10.4 | 3  |
| 172. | P0A6X1 | 541 | 20.6 | 13 |
| 173. | P0A6Z3 | 536 | 9.5  | 11 |
| 174. | P33602 | 534 | 12.2 | 18 |
| 175. | P05793 | 522 | 13.9 | 15 |
| 176. | P00957 | 519 | 14.7 | 23 |
| 177. | P00960 | 514 | 11.6 | 5  |
| 178. | P0ADY3 | 511 | 7.3  | 4  |
| 179. | P10907 | 488 | 5.9  | 2  |
| 180. | P00934 | 488 | 22.9 | 10 |
| 181. | P0AFG3 | 484 | 12.8 | 17 |
| 182. | P76658 | 483 | 8.0  | 7  |
| 183. | P62399 | 481 | 34.6 | 7  |
| 184. | P76149 | 479 | 16.9 | 7  |
| 185. | P0A8N3 | 475 | 6.9  | 13 |
| 186. | P25665 | 472 | 6.9  | 12 |
| 187. | P0A855 | 465 | 10.0 | 7  |
| 188. | P0A9M8 | 463 | 9.7  | 10 |
| 189. | P21889 | 457 | 8.1  | 18 |
| 190. | P67910 | 453 | 22.9 | 11 |
| 191. | P0AC02 | 452 | 17.1 | 8  |
| 192. | P33599 | 448 | 17.0 | 11 |
| 193. | P0ACY3 | 447 | 10.3 | 12 |
| 194. | P0A9X4 | 447 | 15.6 | 6  |
| 195. | P0C0S1 | 442 | 10.1 | 3  |
| 196. | P60422 | 435 | 6.6  | 5  |
| 197. | P64524 | 434 | 30.7 | 4  |

**Documentation of Peptide and Protein Identifications**  
*eFASP-0.2%DCA-4VP (see Table S1)*

|      |        |     |      |    |
|------|--------|-----|------|----|
| 198. | P31979 | 433 | 22.3 | 14 |
| 199. | P0AAI3 | 427 | 14.4 | 16 |
| 200. | P45523 | 424 | 15.6 | 6  |
| 201. | P77425 | 419 | 10.7 | 8  |
| 202. | P0A6H5 | 384 | 12.4 | 10 |
| 203. | P0ACL2 | 383 | 13.2 | 4  |
| 204. | P0AAH0 | 379 | 6.6  | 6  |
| 205. | P0ABI4 | 374 | 12.0 | 4  |
| 206. | P27298 | 374 | 13.1 | 16 |
| 207. | P33232 | 373 | 16.2 | 9  |
| 208. | P00956 | 370 | 9.8  | 21 |
| 209. | P56580 | 370 | 11.6 | 5  |
| 210. | P42620 | 357 | 14.0 | 6  |
| 211. | P17169 | 357 | 20.7 | 9  |
| 212. | P05055 | 352 | 10.8 | 13 |
| 213. | P00962 | 350 | 4.5  | 11 |
| 214. | P37624 | 349 | 6.4  | 13 |
| 215. | P0AFY8 | 347 | 13.3 | 7  |
| 216. | P0A9C0 | 343 | 8.9  | 10 |
| 217. | P76000 | 330 | 20.4 | 6  |
| 218. | P0AAX8 | 329 | 8.8  | 4  |
| 219. | P04152 | 328 | 9.0  | 16 |
| 220. | P60716 | 326 | 11.8 | 5  |
| 221. | P0ADG7 | 325 | 14.6 | 9  |
| 222. | P14375 | 322 | 12.2 | 6  |
| 223. | P0AFI7 | 318 | 15.1 | 6  |
| 224. | P0A7Z4 | 316 | 10.6 | 10 |
| 225. | P07913 | 315 | 7.0  | 4  |
| 226. | P0A9L8 | 307 | 13.0 | 6  |
| 227. | P04079 | 307 | 13.5 | 13 |
| 228. | P77252 | 305 | 4.6  | 6  |
| 229. | P00370 | 305 | 8.5  | 11 |
| 230. | P00550 | 304 | 15.2 | 10 |
| 231. | P25526 | 302 | 17.2 | 9  |
| 232. | P0AEP7 | 300 | 8.9  | 5  |
| 233. | P15639 | 294 | 13.2 | 8  |
| 234. | P39173 | 292 | 5.4  | 4  |
| 235. | P09832 | 288 | 13.8 | 12 |
| 236. | P32721 | 280 | 7.7  | 12 |
| 237. | P76251 | 277 | 8.6  | 8  |

**Documentation of Peptide and Protein Identifications**  
*eFASP-0.2%DCA-4VP (see Table S1)*

|      |        |     |      |    |
|------|--------|-----|------|----|
| 238. | P37747 | 277 | 10.6 | 10 |
| 239. | P45750 | 275 | 14.2 | 4  |
| 240. | P09127 | 274 | 14.5 | 5  |
| 241. | P52143 | 134 | 1.0  | 1  |
